# Supplementary material for: Promzea: a pipeline for discovery of co-regulatory motifs in maize and other plant species and its application to the anthocyanin and phlobaphene biosynthetic pathways and the Maize Development Atlas
Source: PubMed Central journal article supplement (PMC3658923; doi:10.1186/1471-2229-13-42), 2013-03-15
Supplement: 1471-2229-13-42-S2.pdf [file 1471-2229-13-42-S2.pdf]

**Supplementary Table S1:** Summary of promoters and GO annotated genes incorporated into Promzea from maize, Arabidopsis and rice.

| species     | number of protein sequences | number of promoters | number of GO annotated genes in the genome | number of GO terms found in genome |
|-------------|-----------------------------|---------------------|--------------------------------------------|------------------------------------|
| Maize       | 63540                       | 39656               | 26737                                      | 1791                               |
| Arabidopsis | 35386                       | 27416               | 6534                                       | 286                                |
| Rice        | 68619                       | 58058               | 25430                                      | 98                                 |

**Supplementary Table S2.** Effectiveness of combining different motif discovery programs based on nucleotide sensitivity scores.

| tools               | average nSn | synthetic datasets (AM) |      | semi-synthetic datasets (AR) |      | real datasets (MR) |      |
|---------------------|-------------|-------------------------|------|------------------------------|------|--------------------|------|
|                     |             | nSn                     | C.I. | nSn                          | C.I. | nSn                | C.I. |
| Bioprospector       | 0.17        | 0.15                    | 0.07 | 0.16                         | 0.07 | 0.19               | 0.08 |
| Bioprospector filt. | 0.14        | 0.15                    | 0.06 | 0.12                         | 0.05 | 0.14               | 0.07 |
| MEME                | 0.16        | 0.23                    | 0.08 | 0.18                         | 0.07 | 0.08               | 0.04 |
| MEME filt.          | 0.16        | 0.23                    | 0.08 | 0.18                         | 0.07 | 0.06               | 0.04 |
| Weeder              | 0.36        | 0.39                    | 0.08 | 0.41                         | 0.09 | 0.29               | 0.08 |
| Weeder filt.        | 0.31        | 0.31                    | 0.02 | 0.36                         | 0.02 | 0.27               | 0.08 |
| Combined            | 0.49        | 0.53                    | 0.09 | 0.52                         | 0.09 | 0.42               | 0.09 |
| Combined filt.      | 0.44        | 0.47                    | 0.09 | 0.47                         | 0.09 | 0.37               | 0.09 |

Note: The Table shows the numbers illustrated in Figure 3D. C.I. is the 95% confidence interval of the mean.

**Supplementary Table S3.** The effect of applying different MNCP score cut-offs.

| MNCP threshold | nTP | nFN | nFP  | nSn  | nPPV | nSP  | nPC  | nCC    | nASP | nFDR |
|----------------|-----|-----|------|------|------|------|------|--------|------|------|
| combined       | 128 | 202 | 3341 | 0.39 | 0.04 | 0.92 | 0.03 | 0.0942 | 0.21 | 0.96 |
| mncp 1.5       | 112 | 218 | 3031 | 0.36 | 0.04 | 0.92 | 0.03 | 0.0896 | 0.20 | 0.92 |
| mncp 2         | 104 | 226 | 2602 | 0.35 | 0.04 | 0.93 | 0.04 | 0.0931 | 0.19 | 0.92 |
| mncp 3         | 82  | 248 | 1813 | 0.31 | 0.05 | 0.95 | 0.04 | 0.0944 | 0.18 | 0.83 |
| mncp 4         | 47  | 283 | 1151 | 0.22 | 0.03 | 0.96 | 0.02 | 0.0612 | 0.12 | 0.61 |
| mncp 5         | 40  | 290 | 769  | 0.18 | 0.05 | 0.97 | 0.04 | 0.0724 | 0.11 | 0.51 |

Note: The motifs were predicted from the Sandve et al. (2007) benchmark dataset using the filtered, combined motif discovery program. Each statistic represents the average of three runs. The abbreviations and corresponding formulas for each statistic are described in the Methods and in Sandve et al. (2007).

**Supplementary Table S4.** List of input cDNAs from the maize anthocyanin pathway used for Promzea searches.

| gene name | gene description                                         | cDNA genbank ID | cDNA annotation                       | genes Identified by BLAST in maize genome (www.maizesequences.org)                                                                                                                                                                                            | known gene not identified     |
|-----------|----------------------------------------------------------|-----------------|---------------------------------------|---------------------------------------------------------------------------------------------------------------------------------------------------------------------------------------------------------------------------------------------------------------|-------------------------------|
| PAL1      | phenylalanine ammonia-lyase                              | M95077.1        | PAL1, Phenylalanine Ammonia Lyase     | <a href="#">GRMZM2G074604</a> , <a href="#">GRMZM2G441347</a> , <a href="#">GRMZM2G170692</a> , <a href="#">GRMZM2G334660</a> , <a href="#">GRMZM2G063917</a> , <a href="#">GRMZM2G081582</a> , <a href="#">GRMZM2G029048</a> , <a href="#">GRMZM2G118345</a> |                               |
| C2        | Chalcone synthase C2 (Naringenin-chalcone synthase C2)   | BT042976.1      | C2, chalcone synthase                 | <a href="#">GRMZM2G422750</a> , <a href="#">GRMZM2G151227</a> , <a href="#">GRMZM2G175812</a> , <a href="#">GRMZM2G34609</a>                                                                                                                                  |                               |
| C2        | Chalcone synthase C2 (Naringenin-chalcone synthase C2)   | BT061979.1      | C2, chalcone synthase                 | <a href="#">GRMZM2G422750</a> , <a href="#">GRMZM2G151227</a> , <a href="#">GRMZM2G175812</a> , <a href="#">GRMZM2G34609</a>                                                                                                                                  |                               |
| CHI       | chalcone isomerase                                       | NM001156113.1   | CHI, Chalcone Isomerase               | <a href="#">GRMZM2G060011</a> , <a href="#">GRMZM2G357656</a>                                                                                                                                                                                                 |                               |
| CHI       | chalcone isomerase                                       | EU963832.1      | Chalcone isomerase                    | <a href="#">GRMZM2G060011</a> , <a href="#">GRMZM2G357656</a>                                                                                                                                                                                                 |                               |
| F3H       | flavanone 3-hydroxylase1                                 | NM_001112225.1  | F3H, putative flavonoid 3hydroxylase  | <a href="#">GRMZM2G062396</a> , <a href="#">GRMZM2G088795</a> , <a href="#">GRMZM2G702514</a>                                                                                                                                                                 | <a href="#">GRMZM2G175343</a> |
| A1        | Anthocyanidin 3-O-glucosyltransferase - anthocyaninless1 | BT034095.1      | A1, dihydroflavonol-4-reductase       | <a href="#">GRMZM2G026930</a> , <a href="#">GRMZM2G013726</a>                                                                                                                                                                                                 |                               |
| A1        | Anthocyanidin 3-O-glucosyltransferase - anthocyaninless1 | BT043174.1      | dihydroflavonol-4-reductase, putative | <a href="#">GRMZM2G026930</a> , <a href="#">GRMZM2G013726</a>                                                                                                                                                                                                 |                               |
| A1        | Anthocyanidin 3-O-glucosyltransferase - anthocyaninless1 | BT067630.1      | dihydroflavonol-4-reductase, putative | <a href="#">GRMZM2G026930</a> , <a href="#">GRMZM2G013726</a>                                                                                                                                                                                                 |                               |
| A2        | Leucoanthocyanidin dioxygenase - anthocyaninless2        | NM001112604.1   | A2                                    | <a href="#">GRMZM2G345717</a> , <a href="#">GRMZM2G058340</a> , <a href="#">GRMZM2G057891</a> , <a href="#">GRMZM5G869840</a>                                                                                                                                 |                               |
| Bz1       | UDP-glucose flavonoid 3-O-glucosyltransferase - Bronze-1 | DQ335126.1      | Bz1, Bronze1                          | <a href="#">GRMZM2G165390</a> , <a href="#">GRMZM2G022242</a> , <a href="#">GRMZM2G371345</a>                                                                                                                                                                 |                               |
| Bz2       | Probable glutathione S-transferase BZ2 -Bronze-2         | AF377543.1      | Bz2, Bronze2                          | <a href="#">GRMZM2G016241</a> , <a href="#">GRMZM2G146887</a> , <a href="#">GRMZM2G308687</a>                                                                                                                                                                 |                               |

The cDNA sequences were retrieved from Genbank. In this list, corresponding genes from MaizeSequence.org (red text, true loci ; blue text, closest paralogs). The BLAST cut off threshold was set at a percentage identity > 85% and a e-value is < 1e-50

**Additional Table S5. Gene lists and annotations found in genome-wide searches for Promzea-predicted motifs (M1-M5) from the maize anthocyanin biosynthetic pathway: Motif1**

| Gene ID          | Coordinate motif start | Annotation                                                                                                                                                                                                                                                              |
|------------------|------------------------|-------------------------------------------------------------------------------------------------------------------------------------------------------------------------------------------------------------------------------------------------------------------------|
| GRMZM2G465046    | -180                   | lipid metabolic process hydrolase activity, acting on ester bonds                                                                                                                                                                                                       |
| GRMZM2G465046    | -176                   | lipid metabolic process hydrolase activity, acting on ester bonds                                                                                                                                                                                                       |
| GRMZM2G077696    | -75                    | No Description                                                                                                                                                                                                                                                          |
| GRMZM2G434839    | -101                   | protein folding heat shock protein binding unfolded protein binding                                                                                                                                                                                                     |
| GRMZM5G869587    | -147                   | No Description                                                                                                                                                                                                                                                          |
| GRMZM5G820788    | -146                   | No Description                                                                                                                                                                                                                                                          |
| GRMZM2G095441    | -6                     | SNAP receptor activity protein binding intracellular protein transport membrane vesicle-mediated transport                                                                                                                                                              |
| GRMZM2G035749    | -182                   | polysaccharide catabolic process structural constituent of ribosome intracellular ribosome translation beta-amylose activity                                                                                                                                            |
| GRMZM2G371030    | -108                   | No Description                                                                                                                                                                                                                                                          |
| GRMZM2G178278    | -79                    | vesicle-mediated transport                                                                                                                                                                                                                                              |
| GRMZM2G348039    | -197                   | No Description                                                                                                                                                                                                                                                          |
| GRMZM2G113057    | -172                   | No Description                                                                                                                                                                                                                                                          |
| GRMZM2G055899    | -57                    | catalytic activity branched-chain-amino-acid transaminase activity metabolic process branched chain family amino acid metabolic process                                                                                                                                 |
| GRMZM2G472236    | -44                    | homoiothermy ice binding response to freezing                                                                                                                                                                                                                           |
| GRMZM2G432566    | -25                    | protein binding intracellular zinc ion binding                                                                                                                                                                                                                          |
| GRMZM5G890241    | -93                    | protein binding                                                                                                                                                                                                                                                         |
| GRMZM2G153536    | -6                     | catalytic activity branched-chain-amino-acid transaminase activity metabolic process branched chain family amino acid metabolic process                                                                                                                                 |
| AC19161.3 FG002  | -150                   | No Description                                                                                                                                                                                                                                                          |
| GRMZM2G142390    | -120                   | protein kinase activity protein serine/threonine kinase activity ATP binding protein amino acid phosphorylation                                                                                                                                                         |
| GRMZM2G142390    | -116                   | protein kinase activity protein serine/threonine kinase activity ATP binding protein amino acid phosphorylation                                                                                                                                                         |
| GRMZM2G143703    | -139                   | No Description                                                                                                                                                                                                                                                          |
| GRMZM2G058630    | -178                   | phosphatidylcholine-sterol O-acyltransferase activity lipid metabolic process                                                                                                                                                                                           |
| GRMZM2G315862    | -157                   | No Description                                                                                                                                                                                                                                                          |
| GRMZM2G459540    | -11                    | intracellular zinc ion binding                                                                                                                                                                                                                                          |
| GRMZM2G050273    | -67                    | No Description                                                                                                                                                                                                                                                          |
| GRMZM2G368827    | -178                   | membrane                                                                                                                                                                                                                                                                |
| AC206030.4 FG001 | -147                   | drug transmembrane transport drug transmembrane transporter activity antiporter activity membrane transmembrane transport                                                                                                                                               |
| GRMZM2G352381    | -67                    | No Description                                                                                                                                                                                                                                                          |
| GRMZM2G356718    | -169                   | DNA binding catalytic activity                                                                                                                                                                                                                                          |
| GRMZM2G176630    | -137                   | sugar binding protein amino acid glycosylation galactosyltransferase activity membrane homoiothermy ice binding response to freezing                                                                                                                                    |
| GRMZM2G085303    | -19                    | No Description                                                                                                                                                                                                                                                          |
| GRMZM2G312061    | -20                    | cysteine-type endopeptidase inhibitor activity                                                                                                                                                                                                                          |
| GRMZM2G394783    | -121                   | monooxygenase activity iron ion binding electron carrier activity heme binding oxidation reduction                                                                                                                                                                      |
| AC191692.3 FG001 | -136                   | No Description                                                                                                                                                                                                                                                          |
| GRMZM2G115775    | -121                   | protein binding membrane vesicle-mediated transport                                                                                                                                                                                                                     |
| AC217947.4 FG002 | -100                   | iron ion binding FMN binding oxidoreductase activity oxidation reduction                                                                                                                                                                                                |
| GRMZM2G459746    | -7                     | nucleic acid binding                                                                                                                                                                                                                                                    |
| GRMZM2G146207    | -105                   | No Description                                                                                                                                                                                                                                                          |
| GRMZM2G129979    | -154                   | nucleus                                                                                                                                                                                                                                                                 |
| GRMZM2G325575    | -47                    | cellular iron ion homeostasis ferric iron binding oxidoreductase activity transition metal ion binding oxidation reduction                                                                                                                                              |
| GRMZM2G109680    | -142                   | No Description                                                                                                                                                                                                                                                          |
| GRMZM2G163277    | -124                   | No Description                                                                                                                                                                                                                                                          |
| GRMZM2G071745    | -58                    | heme binding                                                                                                                                                                                                                                                            |
| GRMZM2G031996    | -87                    | No Description                                                                                                                                                                                                                                                          |
| GRMZM2G011383    | -183                   | No Description                                                                                                                                                                                                                                                          |
| GRMZM2G166719    | -195                   | protein kinase activity protein serine/threonine kinase activity ATP binding protein amino acid phosphorylation                                                                                                                                                         |
| GRMZM5G894340    | -197                   | No Description                                                                                                                                                                                                                                                          |
| GRMZM2G044348    | -20                    | aspartic-type endopeptidase activity integral to membrane                                                                                                                                                                                                               |
| GRMZM2G018403    | -95                    | RNA binding structural constituent of ribosome intracellular ribosome translation                                                                                                                                                                                       |
| GRMZM2G366434    | -191                   | DNA binding transcription factor activity regulation of transcription, DNA-dependent                                                                                                                                                                                    |
| GRMZM2G074604    | -170                   | catalytic activity cytoplasm L-phenylalanine catabolic process biosynthetic process ammonia-lyase activity                                                                                                                                                              |
| GRMZM2G075366    | -131                   | No Description                                                                                                                                                                                                                                                          |
| GRMZM2G038279    | -62                    | chromatin DNA binding nucleus regulation of transcription, DNA-dependent                                                                                                                                                                                                |
| GRMZM2G104920    | -193                   | ubiquitin ligase complex protein phosphatase type 2A complex ubiquitin-protein ligase activity protein binding signal transduction zinc ion binding protein phosphatase type 2A regulator activity protein ubiquitination homoiothermy ice binding response to freezing |
| GRMZM5G861978    | -163                   | structural constituent of ribosome intracellular ribosome translation                                                                                                                                                                                                   |
| GRMZM2G402797    | -65                    | No Description                                                                                                                                                                                                                                                          |
| AC191740.3 FG004 | -43                    | No Description                                                                                                                                                                                                                                                          |
| GRMZM2G42147     | -45                    | No Description                                                                                                                                                                                                                                                          |
| GRMZM2G106650    | -116                   | monooxygenase activity iron ion binding electron carrier activity heme binding oxidation reduction                                                                                                                                                                      |
| GRMZM2G176129    | -173                   | oxidoreductase activity, acting on NADH or NADPH, quinone or similar compound as acceptor oxidation reduction                                                                                                                                                           |
| GRMZM2G026095    | -27                    | metabolic process zinc ion binding hydrolase activity                                                                                                                                                                                                                   |
| GRMZM2G004188    | -189                   | DNA binding catalytic activity nuclease activity DNA repair                                                                                                                                                                                                             |
| GRMZM2G163297    | -171                   | nucleic acid binding RNA binding                                                                                                                                                                                                                                        |
| GRMZM2G146292    | -170                   | No Description                                                                                                                                                                                                                                                          |
| AC202534.2 FG007 | -191                   | No Description                                                                                                                                                                                                                                                          |
| GRMZM2G106604    | -89                    | No Description                                                                                                                                                                                                                                                          |
| GRMZM2G021051    | -165                   | iron ion binding oxidoreductase activity oxidation reduction                                                                                                                                                                                                            |
| GRMZM2G398758    | -66                    | DNA binding                                                                                                                                                                                                                                                             |
| GRMZM2G152370    | -118                   | No Description                                                                                                                                                                                                                                                          |
| GRMZM2G021243    | -9                     | No Description                                                                                                                                                                                                                                                          |
| GRMZM2G428905    | -176                   | No Description                                                                                                                                                                                                                                                          |
| GRMZM2G336879    | -19                    | ribonucleoside-diphosphate reductase activity ribonucleoside-diphosphate reductase complex DNA replication                                                                                                                                                              |
| GRMZM2G074373    | -19                    | DNA binding transcription factor activity nucleus transcription, DNA-dependent regulation of transcription, DNA-dependent sequence-specific DNA binding regulation of transcription protein dimerization activity                                                       |
| GRMZM2G005753    | -103                   | protein folding heat shock protein binding unfolded protein binding                                                                                                                                                                                                     |
| GRMZM2G016668    | -102                   | protein binding zinc ion binding                                                                                                                                                                                                                                        |
| GRMZM2G018022    | -99                    | metabolic process nucleotide transferase activity                                                                                                                                                                                                                       |
| GRMZM2G135095    | -103                   | structural constituent of ribosome intracellular ribosome translation                                                                                                                                                                                                   |
| GRMZM2G125216    | -59                    | No Description                                                                                                                                                                                                                                                          |
| AC209810.3 FG002 | -22                    | cysteine-type endopeptidase activity proteolysis cysteine-type peptidase activity                                                                                                                                                                                       |
| GRMZM2G013016    | -107                   | No Description                                                                                                                                                                                                                                                          |
| GRMZM2G113319    | -176                   | nucleotide binding motor activity ATP binding myosin complex nucleoside-triphosphatase activity                                                                                                                                                                         |
| AC155377.1 FG001 | -131                   | nucleotide binding motor activity ATP binding myosin complex nucleoside-triphosphatase activity                                                                                                                                                                         |
| GRMZM2G094490    | -114                   | nucleotide binding ATP-dependent peptidase activity serine-type endopeptidase activity ATP binding proteolysis membrane ATPase activity nucleoside-triphosphatase activity                                                                                              |

|                  |      |                                                                                                                                                                                                                                                                                      |
|------------------|------|--------------------------------------------------------------------------------------------------------------------------------------------------------------------------------------------------------------------------------------------------------------------------------------|
| GRMZM2G552418    | -128 | No Description                                                                                                                                                                                                                                                                       |
| GRMZM2G100568    | -189 | No Description                                                                                                                                                                                                                                                                       |
| GRMZM2G005622    | -11  | No Description                                                                                                                                                                                                                                                                       |
| GRMZM2G027253    | -197 | DNA binding regulation of transcription, DNA-dependent                                                                                                                                                                                                                               |
| GRMZM2G147245    | -35  | monooxygenase activity iron ion binding electron carrier activity heme binding oxidation reduction                                                                                                                                                                                   |
| GRMZM2G063961    | -199 | protein kinase activity protein serine/threonine kinase activity ATP binding protein amino acid phosphorylation                                                                                                                                                                      |
| GRMZM2G082037    | -13  | metabolic process transferase activity, transferring hexosyl groups                                                                                                                                                                                                                  |
| GRMZM2G381709    | -32  | small conjugating protein ligase activity post-translational protein modification regulation of protein metabolic process                                                                                                                                                            |
| GRMZM2G036837    | -125 | nucleic acid binding zinc ion binding                                                                                                                                                                                                                                                |
| GRMZM2G024674    | -136 | No Description                                                                                                                                                                                                                                                                       |
| GRMZM2G109627    | -10  | DNA binding regulation of transcription                                                                                                                                                                                                                                              |
| AC211474.3 FG006 | -132 | No Description                                                                                                                                                                                                                                                                       |
| AC211474.3 FG006 | -78  | No Description                                                                                                                                                                                                                                                                       |
| GRMZM2G074824    | -78  | catalytic activity                                                                                                                                                                                                                                                                   |
| GRMZM2G099052    | -131 | No Description                                                                                                                                                                                                                                                                       |
| GRMZM2G168675    | -38  | No Description                                                                                                                                                                                                                                                                       |
| GRMZM2G347471    | -197 | No Description                                                                                                                                                                                                                                                                       |
| GRMZM2G047412    | -134 | No Description                                                                                                                                                                                                                                                                       |
| GRMZM2G028986    | -10  | heme binding                                                                                                                                                                                                                                                                         |
| GRMZM2G361066    | -24  | nucleotide binding ATP-dependent peptidase activity serine-type endopeptidase activity ATP binding proteolysis membrane ATPase activity nucleoside-triphosphatase activity                                                                                                           |
| GRMZM2G025031    | -172 | uroporphyrinogen decarboxylase activity porphyrin biosynthetic process                                                                                                                                                                                                               |
| GRMZM2G169584    | -24  | ATP binding apoptosis                                                                                                                                                                                                                                                                |
| GRMZM2G047214    | -112 | No Description                                                                                                                                                                                                                                                                       |
| GRMZM2G074462    | -199 | catalytic activity carbohydrate metabolic process carbohydrate binding                                                                                                                                                                                                               |
| GRMZM2G085934    | -119 | No Description                                                                                                                                                                                                                                                                       |
| GRMZM2G170420    | -181 | No Description                                                                                                                                                                                                                                                                       |
| GRMZM2G125448    | -195 | transferase activity, transferring acyl groups other than amino-acyl groups                                                                                                                                                                                                          |
| GRMZM2G041388    | -178 | No Description                                                                                                                                                                                                                                                                       |
| GRMZM2G325008    | -122 | hydrolase activity, hydrolyzing O-glycosyl compounds carbohydrate metabolic process cellular process                                                                                                                                                                                 |
| GRMZM2G083555    | -195 | No Description                                                                                                                                                                                                                                                                       |
| GRMZM2G027851    | -173 | voltage-gated potassium channel activity cation transport potassium ion transport sodium ion transport regulation of pH voltage-gated potassium channel complex solute:hydrogen antiporter activity sodium:hydrogen antiporter activity integral to membrane transmembrane transport |
| GRMZM5G838435    | -45  | catalytic activity                                                                                                                                                                                                                                                                   |
| GRMZM2G115579    | -51  | No Description                                                                                                                                                                                                                                                                       |
| AC203972.3 FG001 | -59  | structural constituent of ribosome ATP binding intracellular ribosome translation apoptosis defense response                                                                                                                                                                         |
| GRMZM2G088140    | -51  | DNA binding transcription factor activity nucleus transcription, DNA-dependent regulation of transcription, DNA-dependent sequence-specific DNA binding regulation of transcription protein dimerization activity                                                                    |
| GRMZM2G405170    | -198 | DNA binding regulation of transcription, DNA-dependent                                                                                                                                                                                                                               |
| GRMZM2G043749    | -160 | No Description                                                                                                                                                                                                                                                                       |
| GRMZM2G314593    | -99  | No Description                                                                                                                                                                                                                                                                       |
| GRMZM2G110145    | -163 | membrane cellulose synthase (UDP-forming) activity cellulose biosynthetic process                                                                                                                                                                                                    |
| GRMZM2G021277    | -123 | cellular amino acid and derivative metabolic process carboxy-lyase activity carboxylic acid metabolic process pyridoxal phosphate binding                                                                                                                                            |
| GRMZM2G062541    | -88  | nucleus transcription regulator activity regulation of transcription                                                                                                                                                                                                                 |
| GRMZM2G062541    | -84  | nucleus transcription regulator activity regulation of transcription                                                                                                                                                                                                                 |
| GRMZM2G415579    | -103 | oxidoreductase activity oxidation reduction                                                                                                                                                                                                                                          |
| GRMZM2G027241    | -138 | No Description                                                                                                                                                                                                                                                                       |
| GRMZM2G107299    | -22  | No Description                                                                                                                                                                                                                                                                       |
| GRMZM2G070279    | -60  | alcohol dehydrogenase (NAD) activity metabolic process 2,3-dihydro-2,3-dihydroxybenzoate dehydrogenase activity enterobactin biosynthetic process oxidoreductase activity oxidation reduction                                                                                        |
| GRMZM2G018631    | -34  | protein binding zinc ion binding                                                                                                                                                                                                                                                     |
| GRMZM5G871174    | -138 | No Description                                                                                                                                                                                                                                                                       |

**Supplementary Table S5 (Continued) - Motif 2**

| Gene ID          | Coordinate motif start | Annotation                                                                                                                              |
|------------------|------------------------|-----------------------------------------------------------------------------------------------------------------------------------------|
| GRMZM2G465046    | -180                   | lipid metabolic process hydrolase activity, acting on ester bonds                                                                       |
| GRMZM2G465046    | -176                   | lipid metabolic process hydrolase activity, acting on ester bonds                                                                       |
| GRMZM2G077696    | -75                    | No Description                                                                                                                          |
| GRMZM2G434839    | -101                   | protein folding heat shock protein binding unfolded protein binding                                                                     |
| GRMZM5G869587    | -147                   | No Description                                                                                                                          |
| GRMZM5G820788    | -146                   | No Description                                                                                                                          |
| GRMZM2G095441    | -6                     | SNAP receptor activity protein binding intracellular protein transport membrane vesicle-mediated transport                              |
| GRMZM2G035749    | -182                   | polysaccharide catabolic process structural constituent of ribosome intracellular ribosome translation beta-amylase activity            |
| GRMZM2G371030    | -108                   | No Description                                                                                                                          |
| GRMZM2G178278    | -79                    | vesicle-mediated transport                                                                                                              |
| GRMZM2G348039    | -197                   | No Description                                                                                                                          |
| GRMZM2G113057    | -172                   | No Description                                                                                                                          |
| GRMZM2G055899    | -57                    | catalytic activity branched-chain-amino-acid transaminase activity metabolic process branched chain family amino acid metabolic process |
| GRMZM2G472236    | -44                    | homothermy ice binding response to freezing                                                                                             |
| GRMZM2G432566    | -25                    | protein binding intracellular zinc ion binding                                                                                          |
| GRMZM5G890241    | -93                    | protein binding                                                                                                                         |
| GRMZM2G153536    | -6                     | catalytic activity branched-chain-amino-acid transaminase activity metabolic process branched chain family amino acid metabolic process |
| AC196161.3 FG002 | -150                   | No Description                                                                                                                          |
| GRMZM2G142390    | -120                   | protein kinase activity protein serine/threonine kinase activity ATP binding protein amino acid phosphorylation                         |
| GRMZM2G142390    | -116                   | protein kinase activity protein serine/threonine kinase activity ATP binding protein amino acid phosphorylation                         |
| GRMZM2G143703    | -139                   | No Description                                                                                                                          |
| GRMZM2G058630    | -178                   | phosphatidylcholine-sterol O-acyltransferase activity lipid metabolic process                                                           |
| GRMZM2G315862    | -157                   | No Description                                                                                                                          |
| GRMZM2G459540    | -11                    | intracellular zinc ion binding                                                                                                          |
| GRMZM2G050273    | -67                    | No Description                                                                                                                          |
| GRMZM2G368827    | -178                   | membrane                                                                                                                                |
| AC206030.4 FG001 | -147                   | drug transmembrane transport drug transmembrane transporter activity antiporter activity membrane transmembrane transport               |
| GRMZM2G352381    | -67                    | No Description                                                                                                                          |
| GRMZM2G356718    | -169                   | DNA binding catalytic activity                                                                                                          |
| GRMZM2G176630    | -137                   | sugar binding protein amino acid glycosylation galactosyltransferase activity membrane homothermy ice binding response to freezing      |

|                  |      |                                                                                                                                                                                                                                                                                      |
|------------------|------|--------------------------------------------------------------------------------------------------------------------------------------------------------------------------------------------------------------------------------------------------------------------------------------|
| GRMZM2G085303    | -19  | No Description                                                                                                                                                                                                                                                                       |
| GRMZM2G312061    | -20  | cysteine-type endopeptidase inhibitor activity                                                                                                                                                                                                                                       |
| GRMZM2G394783    | -121 | monooxygenase activity iron ion binding electron carrier activity heme binding oxidation reduction                                                                                                                                                                                   |
| AC191692.3 FG001 | -136 | No Description                                                                                                                                                                                                                                                                       |
| GRMZM2G115775    | -121 | protein binding membrane vesicle-mediated transport                                                                                                                                                                                                                                  |
| AC217947.4 FG002 | -100 | iron ion binding FMN binding oxidoreductase activity oxidation reduction                                                                                                                                                                                                             |
| GRMZM2G459746    | -7   | nucleic acid binding                                                                                                                                                                                                                                                                 |
| GRMZM2G146207    | -105 | No Description                                                                                                                                                                                                                                                                       |
| GRMZM2G129979    | -154 | nucleus                                                                                                                                                                                                                                                                              |
| GRMZM2G325575    | -47  | cellular iron ion homeostasis ferric iron binding oxidoreductase activity transition metal ion binding oxidation reduction                                                                                                                                                           |
| GRMZM2G109680    | -142 | No Description                                                                                                                                                                                                                                                                       |
| GRMZM2G163277    | -124 | No Description                                                                                                                                                                                                                                                                       |
| GRMZM2G071745    | -58  | heme binding                                                                                                                                                                                                                                                                         |
| GRMZM2G031996    | -87  | No Description                                                                                                                                                                                                                                                                       |
| GRMZM2G011383    | -183 | No Description                                                                                                                                                                                                                                                                       |
| GRMZM2G166719    | -195 | protein kinase activity protein serine/threonine kinase activity ATP binding protein amino acid phosphorylation                                                                                                                                                                      |
| GRMZM5G894340    | -197 | No Description                                                                                                                                                                                                                                                                       |
| GRMZM2G044348    | -20  | aspartic-type endopeptidase activity integral to membrane                                                                                                                                                                                                                            |
| GRMZM2G018403    | -95  | RNA binding structural constituent of ribosome intracellular ribosome translation                                                                                                                                                                                                    |
| GRMZM2G366434    | -191 | DNA binding transcription factor activity regulation of transcription, DNA-dependent                                                                                                                                                                                                 |
| GRMZM2G074604    | -170 | catalytic activity cytoplasm L-phenylalanine catabolic process biosynthetic process ammonia-lyase activity                                                                                                                                                                           |
| GRMZM2G075366    | -131 | No Description                                                                                                                                                                                                                                                                       |
| GRMZM2G038279    | -62  | chromatin DNA binding nucleus regulation of transcription, DNA-dependent                                                                                                                                                                                                             |
| GRMZM2G104920    | -193 | ubiquitin ligase complex protein phosphatase type 2A complex ubiquitin-protein ligase activity protein binding signal transduction zinc ion binding protein phosphatase type 2A regulator activity protein ubiquitination homoiothermy ice binding response to freezing              |
| GRMZM5G861978    | -163 | structural constituent of ribosome intracellular ribosome translation                                                                                                                                                                                                                |
| GRMZM2G402797    | -65  | No Description                                                                                                                                                                                                                                                                       |
| AC197340.3 FG004 | -43  | No Description                                                                                                                                                                                                                                                                       |
| GRMZM2G422147    | -45  | No Description                                                                                                                                                                                                                                                                       |
| GRMZM2G106650    | -116 | monooxygenase activity iron ion binding electron carrier activity heme binding oxidation reduction                                                                                                                                                                                   |
| GRMZM2G176129    | -173 | oxidoreductase activity, acting on NADH or NADPH, quinone or similar compound as acceptor oxidation reduction                                                                                                                                                                        |
| GRMZM2G026095    | -27  | metabolic process zinc ion binding hydrolase activity                                                                                                                                                                                                                                |
| GRMZM2G004188    | -189 | DNA binding catalytic activity nuclease activity DNA repair                                                                                                                                                                                                                          |
| GRMZM2G163297    | -171 | nucleic acid binding RNA binding                                                                                                                                                                                                                                                     |
| GRMZM2G146292    | -170 | No Description                                                                                                                                                                                                                                                                       |
| AC202534.2 FG007 | -191 | No Description                                                                                                                                                                                                                                                                       |
| GRMZM2G106604    | -89  | No Description                                                                                                                                                                                                                                                                       |
| GRMZM2G021051    | -165 | iron ion binding oxidoreductase activity oxidation reduction                                                                                                                                                                                                                         |
| GRMZM2G398758    | -66  | DNA binding                                                                                                                                                                                                                                                                          |
| GRMZM2G152370    | -118 | No Description                                                                                                                                                                                                                                                                       |
| GRMZM2G021243    | -9   | No Description                                                                                                                                                                                                                                                                       |
| GRMZM2G428905    | -176 | No Description                                                                                                                                                                                                                                                                       |
| GRMZM2G336879    | -19  | ribonucleoside-diphosphate reductase activity ribonucleoside-diphosphate reductase complex DNA replication                                                                                                                                                                           |
| GRMZM2G074373    | -19  | DNA binding transcription factor activity nucleus transcription, DNA-dependent regulation of transcription, DNA-dependent sequence-specific DNA binding regulation of transcription protein dimerization activity                                                                    |
| GRMZM2G000573    | -103 | protein folding heat shock protein binding unfolded protein binding                                                                                                                                                                                                                  |
| GRMZM2G016668    | -102 | protein binding zinc ion binding                                                                                                                                                                                                                                                     |
| GRMZM2G018022    | -99  | metabolic process nucleotidyltransferase activity                                                                                                                                                                                                                                    |
| GRMZM2G135095    | -103 | structural constituent of ribosome intracellular ribosome translation                                                                                                                                                                                                                |
| GRMZM2G125216    | -59  | No Description                                                                                                                                                                                                                                                                       |
| AC209810.3 FG002 | -22  | cysteine-type endopeptidase activity proteolysis cysteine-type peptidase activity                                                                                                                                                                                                    |
| GRMZM2G013016    | -107 | No Description                                                                                                                                                                                                                                                                       |
| GRMZM2G113319    | -176 | nucleotide binding motor activity ATP binding myosin complex nucleoside-triphosphatase activity                                                                                                                                                                                      |
| AC155377.1 FG001 | -131 | nucleotide binding motor activity ATP binding myosin complex nucleoside-triphosphatase activity                                                                                                                                                                                      |
| GRMZM2G094490    | -114 | nucleotide binding ATP-dependent peptidase activity serine-type endopeptidase activity ATP binding proteolysis membrane ATPase activity nucleoside-triphosphatase activity                                                                                                           |
| GRMZM2G552418    | -128 | No Description                                                                                                                                                                                                                                                                       |
| GRMZM2G100568    | -189 | No Description                                                                                                                                                                                                                                                                       |
| GRMZM2G005622    | -11  | No Description                                                                                                                                                                                                                                                                       |
| GRMZM2G027253    | -197 | DNA binding regulation of transcription, DNA-dependent                                                                                                                                                                                                                               |
| GRMZM2G147245    | -35  | monooxygenase activity iron ion binding electron carrier activity heme binding oxidation reduction                                                                                                                                                                                   |
| GRMZM2G063961    | -199 | protein kinase activity protein serine/threonine kinase activity ATP binding protein amino acid phosphorylation                                                                                                                                                                      |
| GRMZM2G082037    | -13  | metabolic process transferase activity, transferring hexosyl groups                                                                                                                                                                                                                  |
| GRMZM2G381709    | -32  | small conjugating protein ligase activity post-translational protein modification regulation of protein metabolic process                                                                                                                                                            |
| GRMZM2G036837    | -125 | nucleic acid binding zinc ion binding                                                                                                                                                                                                                                                |
| GRMZM2G024674    | -136 | No Description                                                                                                                                                                                                                                                                       |
| GRMZM2G109627    | -10  | DNA binding regulation of transcription                                                                                                                                                                                                                                              |
| AC211474.3 FG006 | -132 | No Description                                                                                                                                                                                                                                                                       |
| AC211474.3 FG006 | -78  | No Description                                                                                                                                                                                                                                                                       |
| GRMZM2G074824    | -78  | catalytic activity                                                                                                                                                                                                                                                                   |
| GRMZM2G099052    | -131 | No Description                                                                                                                                                                                                                                                                       |
| GRMZM2G168675    | -38  | No Description                                                                                                                                                                                                                                                                       |
| GRMZM2G347471    | -197 | No Description                                                                                                                                                                                                                                                                       |
| GRMZM2G047412    | -134 | No Description                                                                                                                                                                                                                                                                       |
| GRMZM2G028986    | -10  | heme binding                                                                                                                                                                                                                                                                         |
| GRMZM2G361066    | -24  | nucleotide binding ATP-dependent peptidase activity serine-type endopeptidase activity ATP binding proteolysis membrane ATPase activity nucleoside-triphosphatase activity                                                                                                           |
| GRMZM2G025031    | -172 | uroporphyrinogen decarboxylase activity porphyrin biosynthetic process                                                                                                                                                                                                               |
| GRMZM2G169584    | -24  | ATP binding apoptosis                                                                                                                                                                                                                                                                |
| GRMZM2G047214    | -112 | No Description                                                                                                                                                                                                                                                                       |
| GRMZM2G074462    | -199 | catalytic activity carbohydrate metabolic process carbohydrate binding                                                                                                                                                                                                               |
| GRMZM2G085934    | -119 | No Description                                                                                                                                                                                                                                                                       |
| GRMZM2G170420    | -181 | No Description                                                                                                                                                                                                                                                                       |
| GRMZM2G125448    | -195 | transferase activity, transferring acyl groups other than amino-acyl groups                                                                                                                                                                                                          |
| GRMZM2G041388    | -178 | No Description                                                                                                                                                                                                                                                                       |
| GRMZM2G325008    | -122 | hydrolase activity, hydrolyzing O-glycosyl compounds carbohydrate metabolic process cellular process                                                                                                                                                                                 |
| GRMZM2G083555    | -195 | No Description                                                                                                                                                                                                                                                                       |
| GRMZM2G027851    | -173 | voltage-gated potassium channel activity cation transport potassium ion transport sodium ion transport regulation of pH voltage-gated potassium channel complex solute:hydrogen antiporter activity sodium:hydrogen antiporter activity integral to membrane transmembrane transport |
| GRMZM5G838435    | -45  | catalytic activity                                                                                                                                                                                                                                                                   |
| GRMZM2G115579    | -51  | No Description                                                                                                                                                                                                                                                                       |

|                  |      |                                                                                                                                                                                                                   |
|------------------|------|-------------------------------------------------------------------------------------------------------------------------------------------------------------------------------------------------------------------|
| AC203972.3_FG001 | -59  | structural constituent of ribosome ATP binding intracellular ribosome translation apoptosis defense response                                                                                                      |
| GRMZM2G088140    | -51  | DNA binding transcription factor activity nucleus transcription, DNA-dependent regulation of transcription, DNA-dependent sequence-specific DNA binding regulation of transcription protein dimerization activity |
| GRMZM2G405170    | -198 | DNA binding regulation of transcription, DNA-dependent                                                                                                                                                            |
| GRMZM2G043749    | -160 | No Description                                                                                                                                                                                                    |
| GRMZM2G314593    | -99  | No Description                                                                                                                                                                                                    |
| GRMZM2G110145    | -163 | membrane cellulose synthase (UDP-forming) activity cellulose biosynthetic process                                                                                                                                 |
| GRMZM2G021277    | -123 | cellular amino acid and derivative metabolic process carboxylase activity carboxylic acid metabolic process pyridoxal phosphate binding                                                                           |
| GRMZM2G062541    | -88  | nucleus transcription regulator activity regulation of transcription                                                                                                                                              |
| GRMZM2G062541    | -84  | nucleus transcription regulator activity regulation of transcription                                                                                                                                              |
| GRMZM2G415579    | -103 | oxidoreductase activity oxidation reduction                                                                                                                                                                       |
| GRMZM2G027241    | -138 | No Description                                                                                                                                                                                                    |
| GRMZM2G107299    | -22  | No Description                                                                                                                                                                                                    |
| GRMZM2G070279    | -60  | alcohol dehydrogenase (NAD) activity metabolic process 2,3-dihydro-2,3-dihydroxybenzoate dehydrogenase activity enterobactin biosynthetic process oxidoreductase activity oxidation reduction                     |
| GRMZM2G018631    | -34  | protein binding zinc ion binding                                                                                                                                                                                  |
| GRMZM5G871174    | -138 | No Description                                                                                                                                                                                                    |
| GRMZM2G352381    | -67  | No Description                                                                                                                                                                                                    |
| GRMZM2G161368    | -188 | No Description                                                                                                                                                                                                    |
| GRMZM2G169207    | -173 | No Description                                                                                                                                                                                                    |
| GRMZM5G836606    | -5   | No Description                                                                                                                                                                                                    |
| GRMZM2G003307    | -58  | No Description                                                                                                                                                                                                    |
| GRMZM2G064773    | -90  | protein serine/threonine kinase activity ATP binding protein amino acid phosphorylation                                                                                                                           |
| GRMZM2G053631    | -11  | nucleic acid binding intracellular nucleobase, nucleoside, nucleotide and nucleic acid metabolic process 3'-5' exonuclease activity                                                                               |
| GRMZM2G398758    | -66  | DNA binding                                                                                                                                                                                                       |
| GRMZM5G899656    | -86  | catalytic activity phosphoribosylamine-glycine ligase activity ATP binding purine base biosynthetic process                                                                                                       |
| GRMZM2G413044    | -16  | hydrolase activity, hydrolyzing O-glycosyl compounds cell wall carbohydrate metabolic process cellular glucan metabolic process xyloglucan:xyloglucosyl transferase activity apoplast                             |

**Supplementary Table S5 (Continued) - Motif 3**

| Gene ID          | Coordinate motif start | Annotation                                                                                                                                                                                                                                                                                                                                                                               |
|------------------|------------------------|------------------------------------------------------------------------------------------------------------------------------------------------------------------------------------------------------------------------------------------------------------------------------------------------------------------------------------------------------------------------------------------|
| GRMZM2G352381    | -67                    | No Description                                                                                                                                                                                                                                                                                                                                                                           |
| GRMZM2G131332    | -4                     | No Description                                                                                                                                                                                                                                                                                                                                                                           |
| GRMZM2G111300    | -56                    | zinc ion transmembrane transporter activity zinc ion transport membrane integral to membrane oxidoreductase activity, acting on paired donors, with incorporation or reduction of molecular oxygen, reduced pteridine as one donor, and incorporation of one atom of oxygen metal ion transport metal ion transmembrane transporter activity transmembrane transport oxidation reduction |
| GRMZM2G169207    | -173                   | No Description                                                                                                                                                                                                                                                                                                                                                                           |
| GRMZM2G430029    | -89                    | No Description                                                                                                                                                                                                                                                                                                                                                                           |
| GRMZM2G012127    | -115                   | No Description                                                                                                                                                                                                                                                                                                                                                                           |
| GRMZM2G355940    | -43                    | translation release factor activity translational termination                                                                                                                                                                                                                                                                                                                            |
| GRMZM2G398758    | -66                    | DNA binding                                                                                                                                                                                                                                                                                                                                                                              |
| GRMZM2G089343    | -13                    | No Description                                                                                                                                                                                                                                                                                                                                                                           |
| GRMZM2G134389    | -14                    | protein tyrosine phosphatase activity dephosphorylation phosphatase activity                                                                                                                                                                                                                                                                                                             |
| GRMZM2G028986    | -10                    | heme binding                                                                                                                                                                                                                                                                                                                                                                             |
| GRMZM2G027241    | -138                   | No Description                                                                                                                                                                                                                                                                                                                                                                           |
| GRMZM2G465046    | -180                   | lipid metabolic process hydrolase activity, acting on ester bonds                                                                                                                                                                                                                                                                                                                        |
| GRMZM2G465046    | -176                   | lipid metabolic process hydrolase activity, acting on ester bonds                                                                                                                                                                                                                                                                                                                        |
| GRMZM2G077696    | -75                    | No Description                                                                                                                                                                                                                                                                                                                                                                           |
| GRMZM2G434839    | -101                   | protein folding heat shock protein binding unfolded protein binding                                                                                                                                                                                                                                                                                                                      |
| GRMZM5G869587    | -147                   | No Description                                                                                                                                                                                                                                                                                                                                                                           |
| GRMZM5G820788    | -146                   | No Description                                                                                                                                                                                                                                                                                                                                                                           |
| GRMZM2G095441    | -6                     | SNAP receptor activity protein binding intracellular protein transport membrane vesicle-mediated transport                                                                                                                                                                                                                                                                               |
| GRMZM2G035749    | -182                   | polysaccharide catabolic process structural constituent of ribosome intracellular ribosome translation beta-amylase activity                                                                                                                                                                                                                                                             |
| GRMZM2G371030    | -108                   | No Description                                                                                                                                                                                                                                                                                                                                                                           |
| GRMZM2G178278    | -79                    | vesicle-mediated transport                                                                                                                                                                                                                                                                                                                                                               |
| GRMZM2G348039    | -197                   | No Description                                                                                                                                                                                                                                                                                                                                                                           |
| GRMZM2G113057    | -172                   | No Description                                                                                                                                                                                                                                                                                                                                                                           |
| GRMZM2G055899    | -57                    | catalytic activity branched-chain-amino-acid transaminase activity metabolic process branched chain family amino acid metabolic process                                                                                                                                                                                                                                                  |
| GRMZM2G472236    | -44                    | homiothermy ice binding response to freezing                                                                                                                                                                                                                                                                                                                                             |
| GRMZM2G432566    | -25                    | protein binding intracellular zinc ion binding                                                                                                                                                                                                                                                                                                                                           |
| GRMZM5G890241    | -93                    | protein binding                                                                                                                                                                                                                                                                                                                                                                          |
| GRMZM2G153536    | -6                     | catalytic activity branched-chain-amino-acid transaminase activity metabolic process branched chain family amino acid metabolic process                                                                                                                                                                                                                                                  |
| AC196161.3_FG002 | -150                   | No Description                                                                                                                                                                                                                                                                                                                                                                           |
| GRMZM2G142390    | -120                   | protein kinase activity protein serine/threonine kinase activity ATP binding protein amino acid phosphorylation                                                                                                                                                                                                                                                                          |
| GRMZM2G142390    | -116                   | protein kinase activity protein serine/threonine kinase activity ATP binding protein amino acid phosphorylation                                                                                                                                                                                                                                                                          |
| GRMZM2G143703    | -139                   | No Description                                                                                                                                                                                                                                                                                                                                                                           |
| GRMZM2G058630    | -178                   | phosphatidylcholine-sterol O-acyltransferase activity lipid metabolic process                                                                                                                                                                                                                                                                                                            |
| GRMZM2G315862    | -157                   | No Description                                                                                                                                                                                                                                                                                                                                                                           |
| GRMZM2G459540    | -11                    | intracellular zinc ion binding                                                                                                                                                                                                                                                                                                                                                           |
| GRMZM2G050273    | -67                    | No Description                                                                                                                                                                                                                                                                                                                                                                           |
| GRMZM2G368827    | -178                   | membrane                                                                                                                                                                                                                                                                                                                                                                                 |
| AC20630.4_FG001  | -147                   | drug transmembrane transport drug transmembrane transporter activity antiporter activity membrane transmembrane transport                                                                                                                                                                                                                                                                |
| GRMZM2G352381    | -67                    | No Description                                                                                                                                                                                                                                                                                                                                                                           |
| GRMZM2G356718    | -169                   | DNA binding catalytic activity                                                                                                                                                                                                                                                                                                                                                           |
| GRMZM2G176630    | -137                   | sugar binding protein amino acid glycosylation galactosyltransferase activity membrane homiothermy ice binding response to freezing                                                                                                                                                                                                                                                      |
| GRMZM2G085303    | -19                    | No Description                                                                                                                                                                                                                                                                                                                                                                           |
| GRMZM2G312061    | -20                    | cysteine-type endopeptidase inhibitor activity                                                                                                                                                                                                                                                                                                                                           |
| GRMZM2G394783    | -121                   | monooxygenase activity iron ion binding electron carrier activity heme binding oxidation reduction                                                                                                                                                                                                                                                                                       |
| AC191692.3_FG001 | -136                   | No Description                                                                                                                                                                                                                                                                                                                                                                           |
| GRMZM2G115775    | -121                   | protein binding membrane vesicle-mediated transport                                                                                                                                                                                                                                                                                                                                      |
| AC217947.4_FG002 | -100                   | iron ion binding FMN binding oxidoreductase activity oxidation reduction                                                                                                                                                                                                                                                                                                                 |
| GRMZM2G459746    | -7                     | nucleic acid binding                                                                                                                                                                                                                                                                                                                                                                     |
| GRMZM2G146207    | -105                   | No Description                                                                                                                                                                                                                                                                                                                                                                           |
| GRMZM2G129979    | -154                   | nucleus                                                                                                                                                                                                                                                                                                                                                                                  |
| GRMZM2G325575    | -47                    | cellular iron ion homeostasis ferric iron binding oxidoreductase activity transition metal ion binding oxidation reduction                                                                                                                                                                                                                                                               |
| GRMZM2G109680    | -142                   | No Description                                                                                                                                                                                                                                                                                                                                                                           |
| GRMZM2G163277    | -124                   | No Description                                                                                                                                                                                                                                                                                                                                                                           |
| GRMZM2G071745    | -58                    | heme binding                                                                                                                                                                                                                                                                                                                                                                             |

|                  |      |                                                                                                                                                                                                                                                                                      |
|------------------|------|--------------------------------------------------------------------------------------------------------------------------------------------------------------------------------------------------------------------------------------------------------------------------------------|
| GRMZM2G031996    | -87  | No Description                                                                                                                                                                                                                                                                       |
| GRMZM2G011383    | -183 | No Description                                                                                                                                                                                                                                                                       |
| GRMZM2G166719    | -195 | protein kinase activity protein serine/threonine kinase activity ATP binding protein amino acid phosphorylation                                                                                                                                                                      |
| GRMZM5G894340    | -197 | No Description                                                                                                                                                                                                                                                                       |
| GRMZM2G044348    | -20  | aspartic-type endopeptidase activity integral to membrane                                                                                                                                                                                                                            |
| GRMZM2G018403    | -95  | RNA binding structural constituent of ribosome intracellular ribosome translation                                                                                                                                                                                                    |
| GRMZM2G366434    | -191 | DNA binding transcription factor activity regulation of transcription, DNA-dependent                                                                                                                                                                                                 |
| GRMZM2G074604    | -170 | catalytic activity cytoplasm L-phenylalanine catabolic process biosynthetic process ammonia-lyase activity                                                                                                                                                                           |
| GRMZM2G075366    | -131 | No Description                                                                                                                                                                                                                                                                       |
| GRMZM2G083279    | -62  | chromatin DNA binding nucleus regulation of transcription, DNA-dependent                                                                                                                                                                                                             |
| GRMZM2G104920    | -193 | ubiquitin ligase complex protein phosphatase type 2A complex ubiquitin-protein ligase activity protein binding signal transduction zinc ion binding protein phosphatase type 2A regulator activity protein ubiquitination homoiothermy ice binding response to freezing              |
| GRMZM5G861978    | -163 | structural constituent of ribosome intracellular ribosome translation                                                                                                                                                                                                                |
| GRMZM2G402797    | -65  | No Description                                                                                                                                                                                                                                                                       |
| AC197340.3_FG004 | -43  | No Description                                                                                                                                                                                                                                                                       |
| GRMZM2G422147    | -45  | No Description                                                                                                                                                                                                                                                                       |
| GRMZM2G106650    | -116 | monooxygenase activity iron ion binding electron carrier activity heme binding oxidation reduction                                                                                                                                                                                   |
| GRMZM2G176129    | -173 | oxidoreductase activity, acting on NADH or NADPH, quinone or similar compound as acceptor oxidation reduction                                                                                                                                                                        |
| GRMZM2G026095    | -27  | metabolic process zinc ion binding hydrolase activity                                                                                                                                                                                                                                |
| GRMZM2G004188    | -189 | DNA binding catalytic activity nuclease activity DNA repair                                                                                                                                                                                                                          |
| GRMZM2G163297    | -171 | nucleic acid binding RNA binding                                                                                                                                                                                                                                                     |
| GRMZM2G146292    | -170 | No Description                                                                                                                                                                                                                                                                       |
| AC202534.2_FG007 | -191 | No Description                                                                                                                                                                                                                                                                       |
| GRMZM2G106604    | -89  | No Description                                                                                                                                                                                                                                                                       |
| GRMZM2G021051    | -165 | iron ion binding oxidoreductase activity oxidation reduction                                                                                                                                                                                                                         |
| GRMZM2G398758    | -66  | DNA binding                                                                                                                                                                                                                                                                          |
| GRMZM2G152370    | -118 | No Description                                                                                                                                                                                                                                                                       |
| GRMZM2G021243    | -9   | No Description                                                                                                                                                                                                                                                                       |
| GRMZM2G428905    | -176 | No Description                                                                                                                                                                                                                                                                       |
| GRMZM2G336879    | -19  | ribonucleoside-diphosphate reductase activity ribonucleoside-diphosphate reductase complex DNA replication                                                                                                                                                                           |
| GRMZM2G074373    | -19  | DNA binding transcription factor activity nucleus transcription, DNA-dependent regulation of transcription, DNA-dependent sequence-specific DNA binding regulation of transcription protein dimerization activity                                                                    |
| GRMZM2G005753    | -103 | protein folding heat shock protein binding unfolded protein binding                                                                                                                                                                                                                  |
| GRMZM2G016668    | -102 | protein binding zinc ion binding                                                                                                                                                                                                                                                     |
| GRMZM2G018022    | -99  | metabolic process nucleotidyltransferase activity                                                                                                                                                                                                                                    |
| GRMZM2G135095    | -103 | structural constituent of ribosome intracellular ribosome translation                                                                                                                                                                                                                |
| GRMZM2G125216    | -59  | No Description                                                                                                                                                                                                                                                                       |
| AC209810.3_FG002 | -22  | cysteine-type endopeptidase activity proteolysis cysteine-type peptidase activity                                                                                                                                                                                                    |
| GRMZM2G013016    | -107 | No Description                                                                                                                                                                                                                                                                       |
| GRMZM2G113319    | -176 | nucleotide binding motor activity ATP binding myosin complex nucleoside-triphosphatase activity                                                                                                                                                                                      |
| AC155377.1_FG001 | -131 | nucleotide binding motor activity ATP binding myosin complex nucleoside-triphosphatase activity                                                                                                                                                                                      |
| GRMZM2G094490    | -114 | nucleotide binding ATP-dependent peptidase activity serine-type endopeptidase activity ATP binding proteolysis membrane ATPase activity nucleoside-triphosphatase activity                                                                                                           |
| GRMZM2G552418    | -128 | No Description                                                                                                                                                                                                                                                                       |
| GRMZM2G100568    | -189 | No Description                                                                                                                                                                                                                                                                       |
| GRMZM2G005622    | -11  | No Description                                                                                                                                                                                                                                                                       |
| GRMZM2G027253    | -197 | DNA binding regulation of transcription, DNA-dependent                                                                                                                                                                                                                               |
| GRMZM2G147245    | -35  | monooxygenase activity iron ion binding electron carrier activity heme binding oxidation reduction                                                                                                                                                                                   |
| GRMZM2G063961    | -199 | protein kinase activity protein serine/threonine kinase activity ATP binding protein amino acid phosphorylation                                                                                                                                                                      |
| GRMZM2G082037    | -13  | metabolic process transferase activity, transferring hexosyl groups                                                                                                                                                                                                                  |
| GRMZM2G381709    | -32  | small conjugating protein ligase activity post-translational protein modification regulation of protein metabolic process                                                                                                                                                            |
| GRMZM2G036837    | -125 | nucleic acid binding zinc ion binding                                                                                                                                                                                                                                                |
| GRMZM2G024674    | -136 | No Description                                                                                                                                                                                                                                                                       |
| GRMZM2G109627    | -10  | DNA binding regulation of transcription                                                                                                                                                                                                                                              |
| AC211474.3_FG006 | -132 | No Description                                                                                                                                                                                                                                                                       |
| AC211474.3_FG006 | -78  | No Description                                                                                                                                                                                                                                                                       |
| GRMZM2G074824    | -78  | catalytic activity                                                                                                                                                                                                                                                                   |
| GRMZM2G099052    | -131 | No Description                                                                                                                                                                                                                                                                       |
| GRMZM2G168675    | -38  | No Description                                                                                                                                                                                                                                                                       |
| GRMZM2G347471    | -197 | No Description                                                                                                                                                                                                                                                                       |
| GRMZM2G047412    | -134 | No Description                                                                                                                                                                                                                                                                       |
| GRMZM2G028986    | -10  | heme binding                                                                                                                                                                                                                                                                         |
| GRMZM2G361066    | -24  | nucleotide binding ATP-dependent peptidase activity serine-type endopeptidase activity ATP binding proteolysis membrane ATPase activity nucleoside-triphosphatase activity                                                                                                           |
| GRMZM2G025031    | -172 | uroporphyrinogen decarboxylase activity porphyrin biosynthetic process                                                                                                                                                                                                               |
| GRMZM2G169584    | -24  | ATP binding apoptosis                                                                                                                                                                                                                                                                |
| GRMZM2G047214    | -112 | No Description                                                                                                                                                                                                                                                                       |
| GRMZM2G074462    | -199 | catalytic activity carbohydrate metabolic process carbohydrate binding                                                                                                                                                                                                               |
| GRMZM2G085934    | -119 | No Description                                                                                                                                                                                                                                                                       |
| GRMZM2G170420    | -181 | No Description                                                                                                                                                                                                                                                                       |
| GRMZM2G125448    | -195 | transferase activity, transferring acyl groups other than amino-acyl groups                                                                                                                                                                                                          |
| GRMZM2G041388    | -178 | No Description                                                                                                                                                                                                                                                                       |
| GRMZM2G325008    | -122 | hydrolase activity, hydrolyzing O-glycosyl compounds carbohydrate metabolic process cellular process                                                                                                                                                                                 |
| GRMZM2G083555    | -195 | No Description                                                                                                                                                                                                                                                                       |
| GRMZM2G027851    | -173 | voltage-gated potassium channel activity cation transport potassium ion transport sodium ion transport regulation of pH voltage-gated potassium channel complex solute:hydrogen antiporter activity sodium:hydrogen antiporter activity integral to membrane transmembrane transport |
| GRMZM5G838435    | -45  | catalytic activity                                                                                                                                                                                                                                                                   |
| GRMZM2G115579    | -51  | No Description                                                                                                                                                                                                                                                                       |
| AC203972.3_FG001 | -59  | structural constituent of ribosome ATP binding intracellular ribosome translation apoptosis defense response                                                                                                                                                                         |
| GRMZM2G088140    | -51  | DNA binding transcription factor activity nucleus transcription, DNA-dependent regulation of transcription, DNA-dependent sequence-specific DNA binding regulation of transcription protein dimerization activity                                                                    |
| GRMZM2G408170    | -198 | DNA binding regulation of transcription, DNA-dependent                                                                                                                                                                                                                               |
| GRMZM2G043749    | -160 | No Description                                                                                                                                                                                                                                                                       |
| GRMZM2G314593    | -99  | No Description                                                                                                                                                                                                                                                                       |
| GRMZM2G110145    | -163 | membrane cellulose synthase (UDP-forming) activity cellulose biosynthetic process                                                                                                                                                                                                    |
| GRMZM2G021277    | -123 | cellular amino acid and derivative metabolic process carboxy-lyase activity carboxylic acid metabolic process pyridoxal phosphate binding                                                                                                                                            |
| GRMZM2G062541    | -88  | nucleus transcription regulator activity regulation of transcription                                                                                                                                                                                                                 |
| GRMZM2G062541    | -84  | nucleus transcription regulator activity regulation of transcription                                                                                                                                                                                                                 |
| GRMZM2G415579    | -103 | oxidoreductase activity oxidation reduction                                                                                                                                                                                                                                          |
| GRMZM2G027241    | -138 | No Description                                                                                                                                                                                                                                                                       |
| GRMZM2G107299    | -22  | No Description                                                                                                                                                                                                                                                                       |



|                  |      |                                                                                                                                                                                                                                                          |
|------------------|------|----------------------------------------------------------------------------------------------------------------------------------------------------------------------------------------------------------------------------------------------------------|
| GRMZM2G070279    | -60  | alcohol dehydrogenase (NAD) activity metabolic process 2,3-dihydro-2,3-dihydroxybenzoate dehydrogenase activity enterobactin biosynthetic process oxidoreductase activity oxidation reduction                                                            |
| GRMZM2G018631    | -34  | protein binding zinc ion binding                                                                                                                                                                                                                         |
| GRMZM5G871174    | -138 | No Description                                                                                                                                                                                                                                           |
| GRMZM2G352381    | -67  | No Description                                                                                                                                                                                                                                           |
| GRMZM2G161368    | -188 | No Description                                                                                                                                                                                                                                           |
| GRMZM2G169207    | -173 | No Description                                                                                                                                                                                                                                           |
| GRMZM5G836606    | -5   | No Description                                                                                                                                                                                                                                           |
| GRMZM2G003307    | -58  | No Description                                                                                                                                                                                                                                           |
| GRMZM2G064773    | -90  | protein serine/threonine kinase activity ATP binding protein amino acid phosphorylation                                                                                                                                                                  |
| GRMZM2G053631    | -11  | nucleic acid binding intracellular nucleobase, nucleoside, nucleotide and nucleic acid metabolic process 3'-5' exonuclease activity                                                                                                                      |
| GRMZM2G398758    | -66  | DNA binding                                                                                                                                                                                                                                              |
| GRMZM5G899656    | -86  | catalytic activity phosphoribosylamine-glycine ligase activity ATP binding purine base biosynthetic process                                                                                                                                              |
| GRMZM2G413044    | -16  | hydrolase activity, hydrolyzing O-glycosyl compounds cell wall carbohydrate metabolic process cellular glucan metabolic process xyloglucan:xyloglucosyl transferase activity apoplast                                                                    |
| GRMZM2G082198    | -43  | nucleic acid binding                                                                                                                                                                                                                                     |
| GRMZM2G062318    | -99  | No Description                                                                                                                                                                                                                                           |
| GRMZM2G402156    | -48  | DNA binding                                                                                                                                                                                                                                              |
| AC197699_3 FG008 | -21  | No Description                                                                                                                                                                                                                                           |
| GRMZM2G448656    | -32  | No Description                                                                                                                                                                                                                                           |
| GRMZM2G083716    | -100 | protein binding ATP binding cytoplasm protein folding protein refolding cellular protein metabolic process                                                                                                                                               |
| AC187789_3 FG001 | -46  | No Description                                                                                                                                                                                                                                           |
| GRMZM2G455687    | -158 | No Description                                                                                                                                                                                                                                           |
| GRMZM2G138370    | -179 | No Description                                                                                                                                                                                                                                           |
| GRMZM2G134049    | -114 | No Description                                                                                                                                                                                                                                           |
| GRMZM2G047867    | -55  | catalytic activity                                                                                                                                                                                                                                       |
| GRMZM2G081474    | -22  | histone deacetylase activity histone deacetylation acetoin metabolic process                                                                                                                                                                             |
| GRMZM2G305238    | -51  | No Description                                                                                                                                                                                                                                           |
| GRMZM2G029690    | -186 | protein binding zinc ion binding                                                                                                                                                                                                                         |
| GRMZM2G028254    | -19  | No Description                                                                                                                                                                                                                                           |
| GRMZM2G451746    | -99  | No Description                                                                                                                                                                                                                                           |
| GRMZM2G116452    | -176 | peroxidase activity response to oxidative stress heme binding oxidation reduction                                                                                                                                                                        |
| GRMZM2G704352    | -113 | No Description                                                                                                                                                                                                                                           |
| GRMZM2G121360    | -179 | metal ion transport metal ion binding                                                                                                                                                                                                                    |
| GRMZM5G828123    | -18  | No Description                                                                                                                                                                                                                                           |
| GRMZM5G828987    | -59  | hydrolase activity, hydrolyzing O-glucosyl compounds carbohydrate metabolic process                                                                                                                                                                      |
| GRMZM2G126821    | -155 | structural constituent of ribosome intracellular ribosome translation small ribosomal subunit                                                                                                                                                            |
| GRMZM2G359931    | -174 | structural constituent of ribosome cyclic-dependent protein kinase inhibitor activity histamine receptor activity intracellular nucleus ribosome translation cell cycle arrest G-protein coupled receptor protein signaling pathway integral to membrane |
| GRMZM5G809743    | -135 | No Description                                                                                                                                                                                                                                           |
| GRMZM2G022907    | -18  | No Description                                                                                                                                                                                                                                           |
| GRMZM2G139852    | -93  | No Description                                                                                                                                                                                                                                           |
| GRMZM2G153536    | -8   | catalytic activity branched-chain-amino-acid transaminase activity metabolic process branched chain family amino acid metabolic process                                                                                                                  |
| GRMZM2G085427    | -131 | DNA binding                                                                                                                                                                                                                                              |
| AC231441_1 FG004 | -152 | No Description                                                                                                                                                                                                                                           |
| GRMZM2G161337    | -105 | tryptophan biosynthetic process anthranilate synthase activity biosynthetic process oxo-acid-lyase activity                                                                                                                                              |
| GRMZM2G345330    | -164 | No Description                                                                                                                                                                                                                                           |
| GRMZM2G174284    | -66  | transcription factor activity regulation of transcription, DNA-dependent sequence-specific DNA binding                                                                                                                                                   |
| GRMZM2G013299    | -16  | glutathione peroxidase activity response to oxidative stress oxidation reduction                                                                                                                                                                         |
| GRMZM2G552278    | -164 | No Description                                                                                                                                                                                                                                           |
| GRMZM5G828488    | -17  | No Description                                                                                                                                                                                                                                           |
| GRMZM2G030636    | -192 | No Description                                                                                                                                                                                                                                           |
| GRMZM2G089291    | -78  | iron ion binding sodium ion transport regulation of pH electron carrier activity sodium:hydrogen antiporter activity membrane integral to membrane oxidoreductase activity FAD binding oxidation reduction                                               |
| GRMZM2G001895    | -120 | binding heat shock protein binding                                                                                                                                                                                                                       |
| GRMZM5G841743    | -48  | No Description                                                                                                                                                                                                                                           |
| GRMZM2G030436    | -136 | transferase activity, transferring acyl groups other than amino-acyl groups                                                                                                                                                                              |
| GRMZM2G123418    | -20  | No Description                                                                                                                                                                                                                                           |
| GRMZM2G034680    | -59  | No Description                                                                                                                                                                                                                                           |
| GRMZM2G303010    | -190 | No Description                                                                                                                                                                                                                                           |
| GRMZM2G119339    | -22  | No Description                                                                                                                                                                                                                                           |
| GRMZM2G008250    | -116 | No Description                                                                                                                                                                                                                                           |
| GRMZM2G042313    | -44  | structural constituent of ribosome intracellular ribosome translation transport amino acid transport amino acid transmembrane transporter activity membrane transmembrane transport                                                                      |
| GRMZM2G093809    | -60  | protein kinase activity protein serine/threonine kinase activity protein binding ATP binding protein amino acid phosphorylation                                                                                                                          |
| GRMZM2G009117    | -190 | metal ion transport metal ion binding                                                                                                                                                                                                                    |
| GRMZM2G472671    | -90  | nucleus type I hypersensitivity transcription regulator activity regulation of transcription                                                                                                                                                             |
| GRMZM2G340305    | -56  | DNA binding regulation of transcription                                                                                                                                                                                                                  |
| GRMZM2G016439    | -106 | two-component signal transduction system (phosphorelay) signal transducer activity                                                                                                                                                                       |
| GRMZM2G449163    | -112 | protein tyrosine phosphatase activity dephosphorylation phosphatase activity                                                                                                                                                                             |
| GRMZM2G160560    | -21  | membrane                                                                                                                                                                                                                                                 |
| GRMZM2G564469    | -174 | No Description                                                                                                                                                                                                                                           |
| GRMZM2G101105    | -41  | RNA binding double-stranded RNA binding ribonuclease III activity intracellular RNA processing                                                                                                                                                           |
| GRMZM2G703910    | -101 | No Description                                                                                                                                                                                                                                           |
| GRMZM2G067626    | -18  | No Description                                                                                                                                                                                                                                           |
| GRMZM2G131591    | -187 | protein binding zinc ion binding                                                                                                                                                                                                                         |
| GRMZM2G135866    | -189 | protein binding zinc ion binding                                                                                                                                                                                                                         |
| GRMZM2G459291    | -22  | catalytic activity                                                                                                                                                                                                                                       |
| GRMZM5G830585    | -77  | No Description                                                                                                                                                                                                                                           |
| GRMZM2G145412    | -112 | No Description                                                                                                                                                                                                                                           |
| GRMZM2G163761    | -19  | transcription factor activity catalytic activity nucleus regulation of transcription, DNA-dependent transcription regulator activity sequence-specific DNA binding cellular metabolic process                                                            |
| GRMZM2G036505    | -151 | No Description                                                                                                                                                                                                                                           |
| GRMZM2G416426    | -134 | No Description                                                                                                                                                                                                                                           |
| GRMZM2G174083    | -115 | motor activity ATP binding myosin complex                                                                                                                                                                                                                |
| GRMZM2G053023    | -176 | cell redox homeostasis                                                                                                                                                                                                                                   |
| GRMZM2G022662    | -147 | translation elongation factor activity translational elongation                                                                                                                                                                                          |
| GRMZM2G104125    | -10  | protein kinase activity protein serine/threonine kinase activity calcium ion binding ATP binding protein amino acid phosphorylation                                                                                                                      |
| GRMZM2G347056    | -54  | methylene tetrahydrofolate reductase (NADPH) activity methionine metabolic process oxidation reduction                                                                                                                                                   |
| GRMZM2G016084    | -163 | RNA binding                                                                                                                                                                                                                                              |
| GRMZM2G023557    | -66  | DNA binding                                                                                                                                                                                                                                              |
| GRMZM2G339848    | -151 | transcription factor activity regulation of transcription, DNA-dependent sequence-specific DNA binding                                                                                                                                                   |

|                  |      |                                                                                                                                                                                                                                                                                                                                                                                                                                                                                                                                                                                                                           |
|------------------|------|---------------------------------------------------------------------------------------------------------------------------------------------------------------------------------------------------------------------------------------------------------------------------------------------------------------------------------------------------------------------------------------------------------------------------------------------------------------------------------------------------------------------------------------------------------------------------------------------------------------------------|
| GRMZM2G140527    | -121 | copper ion binding oxidoreductase activity oxidation reduction                                                                                                                                                                                                                                                                                                                                                                                                                                                                                                                                                            |
| GRMZM2G122498    | -180 | monoxygenase activity iron ion binding electron carrier activity heme binding oxidation reduction                                                                                                                                                                                                                                                                                                                                                                                                                                                                                                                         |
| AC218998.2 FG001 | -160 | monoxygenase activity iron ion binding electron carrier activity heme binding oxidation reduction                                                                                                                                                                                                                                                                                                                                                                                                                                                                                                                         |
| GRMZM2G434299    | -51  | No Description                                                                                                                                                                                                                                                                                                                                                                                                                                                                                                                                                                                                            |
| GRMZM2G011896    | -21  | protein kinase activity protein serine/threonine kinase activity protein binding ATP binding protein amino acid phosphorylation                                                                                                                                                                                                                                                                                                                                                                                                                                                                                           |
| GRMZM2G074293    | -28  | No Description                                                                                                                                                                                                                                                                                                                                                                                                                                                                                                                                                                                                            |
| GRMZM2G171420    | -73  | No Description                                                                                                                                                                                                                                                                                                                                                                                                                                                                                                                                                                                                            |
| AC209029.2 FG002 | -173 | No Description                                                                                                                                                                                                                                                                                                                                                                                                                                                                                                                                                                                                            |
| GRMZM2G702379    | -148 | No Description                                                                                                                                                                                                                                                                                                                                                                                                                                                                                                                                                                                                            |
| GRMZM2G170829    | -98  | manganese ion binding nutrient reservoir activity apoptosis                                                                                                                                                                                                                                                                                                                                                                                                                                                                                                                                                               |
| AC196475.3 FG004 | -175 | methyltransferase activity O-methyltransferase activity protein dimerization activity                                                                                                                                                                                                                                                                                                                                                                                                                                                                                                                                     |
| GRMZM2G055520    | -99  | No Description                                                                                                                                                                                                                                                                                                                                                                                                                                                                                                                                                                                                            |
| GRMZM2G354618    | -182 | nucleus transcription regulator activity regulation of transcription                                                                                                                                                                                                                                                                                                                                                                                                                                                                                                                                                      |
| GRMZM2G702419    | -190 | No Description                                                                                                                                                                                                                                                                                                                                                                                                                                                                                                                                                                                                            |
| GRMZM2G036217    | -8   | No Description                                                                                                                                                                                                                                                                                                                                                                                                                                                                                                                                                                                                            |
| GRMZM2G425999    | -181 | potassium ion transport potassium ion transmembrane transporter activity membrane                                                                                                                                                                                                                                                                                                                                                                                                                                                                                                                                         |
| AC205664.3 FG001 | -78  | No Description                                                                                                                                                                                                                                                                                                                                                                                                                                                                                                                                                                                                            |
| AC191692.3 FG001 | -138 | No Description                                                                                                                                                                                                                                                                                                                                                                                                                                                                                                                                                                                                            |
| GRMZM2G013214    | -131 | metabolic process oxidoreductase activity homoiothermy ice binding response to freezing oxidation reduction                                                                                                                                                                                                                                                                                                                                                                                                                                                                                                               |
| GRMZM2G168171    | -124 | No Description                                                                                                                                                                                                                                                                                                                                                                                                                                                                                                                                                                                                            |
| AC205269.3 FG003 | -19  | No Description                                                                                                                                                                                                                                                                                                                                                                                                                                                                                                                                                                                                            |
| GRMZM2G394945    | -49  | No Description                                                                                                                                                                                                                                                                                                                                                                                                                                                                                                                                                                                                            |
| GRMZM2G122979    | -138 | No Description                                                                                                                                                                                                                                                                                                                                                                                                                                                                                                                                                                                                            |
| GRMZM2G135132    | -198 | 6-phosphofructokinase activity adenosine kinase activity ribokinase activity 6-phosphofructokinase complex D-ribose metabolic process glycolysis purine ribonucleoside salvage                                                                                                                                                                                                                                                                                                                                                                                                                                            |
| GRMZM2G129675    | -66  | No Description                                                                                                                                                                                                                                                                                                                                                                                                                                                                                                                                                                                                            |
| GRMZM2G147780    | -70  | Rho guanyl-nucleotide exchange factor activity                                                                                                                                                                                                                                                                                                                                                                                                                                                                                                                                                                            |
| GRMZM2G076651    | -46  | hydrolyase activity                                                                                                                                                                                                                                                                                                                                                                                                                                                                                                                                                                                                       |
| GRMZM2G063276    | -9   | hydrolyase activity                                                                                                                                                                                                                                                                                                                                                                                                                                                                                                                                                                                                       |
| GRMZM2G081843    | -163 | transporter activity transport membrane integral to membrane transmembrane transport                                                                                                                                                                                                                                                                                                                                                                                                                                                                                                                                      |
| GRMZM2G108147    | -174 | catalytic activity                                                                                                                                                                                                                                                                                                                                                                                                                                                                                                                                                                                                        |
| GRMZM2G008819    | -158 | copper ion binding electron carrier activity                                                                                                                                                                                                                                                                                                                                                                                                                                                                                                                                                                              |
| GRMZM2G138949    | -61  | No Description                                                                                                                                                                                                                                                                                                                                                                                                                                                                                                                                                                                                            |
| GRMZM2G038479    | -24  | nucleus transcription regulator activity regulation of transcription                                                                                                                                                                                                                                                                                                                                                                                                                                                                                                                                                      |
| GRMZM2G406552    | -116 | No Description                                                                                                                                                                                                                                                                                                                                                                                                                                                                                                                                                                                                            |
| GRMZM2G131957    | -21  | nucleic acid binding structural constituent of cell wall                                                                                                                                                                                                                                                                                                                                                                                                                                                                                                                                                                  |
| GRMZM2G332505    | -198 | nucleosome DNA binding nucleus nucleosome assembly amino acid transport membrane                                                                                                                                                                                                                                                                                                                                                                                                                                                                                                                                          |
| GRMZM2G051541    | -55  | No Description                                                                                                                                                                                                                                                                                                                                                                                                                                                                                                                                                                                                            |
| GRMZM2G049839    | -138 | aspartic-type endopeptidase activity proteolysis                                                                                                                                                                                                                                                                                                                                                                                                                                                                                                                                                                          |
| GRMZM2G336761    | -30  | protein binding zinc ion binding                                                                                                                                                                                                                                                                                                                                                                                                                                                                                                                                                                                          |
| GRMZM2G143445    | -159 | No Description                                                                                                                                                                                                                                                                                                                                                                                                                                                                                                                                                                                                            |
| GRMZM2G010152    | -108 | DNA binding catalytic activity DNA topoisomerase (ATP-hydrolyzing) activity copper-exporting ATPase activity copper ion binding ATP binding chromosome DNA topological change ATP biosynthetic process copper ion transport metabolic process mercury ion transmembrane transporter activity ATPase activity, coupled to transmembrane movement of ions, phosphorylative mechanism mercury ion transport membrane integral to membrane hydrolyase activity, acting on acid anhydrides, catalyzing transmembrane movement of substances metal ion transport metal ion binding metal ion transmembrane transporter activity |
| GRMZM2G088258    | -11  | oxidoreductase activity                                                                                                                                                                                                                                                                                                                                                                                                                                                                                                                                                                                                   |
| GRMZM2G168888    | -195 | thiosulfate sulfurtransferase activity sulfate transport                                                                                                                                                                                                                                                                                                                                                                                                                                                                                                                                                                  |
| GRMZM2G119640    | -8   | nucleic acid binding zinc ion binding                                                                                                                                                                                                                                                                                                                                                                                                                                                                                                                                                                                     |
| GRMZM2G183217    | -196 | lipid metabolic process hydrolyase activity, acting on ester bonds                                                                                                                                                                                                                                                                                                                                                                                                                                                                                                                                                        |
| AC190636.3 FG005 | -116 | oxidoreductase activity                                                                                                                                                                                                                                                                                                                                                                                                                                                                                                                                                                                                   |
| GRMZM2G133481    | -56  | catalytic activity                                                                                                                                                                                                                                                                                                                                                                                                                                                                                                                                                                                                        |
| GRMZM2G002765    | -164 | catalytic activity                                                                                                                                                                                                                                                                                                                                                                                                                                                                                                                                                                                                        |
| GRMZM2G002765    | -161 | catalytic activity                                                                                                                                                                                                                                                                                                                                                                                                                                                                                                                                                                                                        |
| GRMZM2G110881    | -119 | catalytic activity 3-beta-hydroxy-delta5-steroid dehydrogenase activity steroid biosynthetic process metabolic process oxidoreductase activity cellular metabolic process coenzyme binding                                                                                                                                                                                                                                                                                                                                                                                                                                |
| GRMZM2G0810054   | -55  | No Description                                                                                                                                                                                                                                                                                                                                                                                                                                                                                                                                                                                                            |
| GRMZM2G701300    | -41  | No Description                                                                                                                                                                                                                                                                                                                                                                                                                                                                                                                                                                                                            |
| GRMZM2G171953    | -103 | No Description                                                                                                                                                                                                                                                                                                                                                                                                                                                                                                                                                                                                            |
| GRMZM2G077295    | -28  | protein binding intracellular protein transport ER to Golgi vesicle-mediated transport zinc ion binding COPII vesicle coat                                                                                                                                                                                                                                                                                                                                                                                                                                                                                                |
| GRMZM2G019958    | -196 | No Description                                                                                                                                                                                                                                                                                                                                                                                                                                                                                                                                                                                                            |
| GRMZM2G160664    | -20  | DNA binding ATP binding nucleus DNA replication DNA-dependent DNA replication initiation                                                                                                                                                                                                                                                                                                                                                                                                                                                                                                                                  |
| GRMZM2G102601    | -131 | two-component sensor activity ATP binding signal transduction membrane phosphorylation transferase activity, transferring phosphorus-containing groups                                                                                                                                                                                                                                                                                                                                                                                                                                                                    |
| AC194402.2 FG004 | -110 | No Description                                                                                                                                                                                                                                                                                                                                                                                                                                                                                                                                                                                                            |
| GRMZM2G018943    | -166 | cellular metabolic process                                                                                                                                                                                                                                                                                                                                                                                                                                                                                                                                                                                                |
| GRMZM2G388576    | -116 | No Description                                                                                                                                                                                                                                                                                                                                                                                                                                                                                                                                                                                                            |
| GRMZM2G403218    | -17  | No Description                                                                                                                                                                                                                                                                                                                                                                                                                                                                                                                                                                                                            |
| GRMZM2G162544    | -16  | SNAP receptor activity protein binding intracellular protein transport membrane vesicle-mediated transport                                                                                                                                                                                                                                                                                                                                                                                                                                                                                                                |
| GRMZM2G462081    | -14  | No Description                                                                                                                                                                                                                                                                                                                                                                                                                                                                                                                                                                                                            |
| GRMZM2G701448    | -177 | DNA binding DNA topoisomerase (ATP-hydrolyzing) activity ATP binding chromosome DNA topological change                                                                                                                                                                                                                                                                                                                                                                                                                                                                                                                    |
| GRMZM2G123097    | -186 | No Description                                                                                                                                                                                                                                                                                                                                                                                                                                                                                                                                                                                                            |
| GRMZM2G054745    | -191 | structural molecule activity viral capsid heat shock protein binding                                                                                                                                                                                                                                                                                                                                                                                                                                                                                                                                                      |
| GRMZM2G102447    | -37  | No Description                                                                                                                                                                                                                                                                                                                                                                                                                                                                                                                                                                                                            |
| AC185261.4 FG002 | -12  | No Description                                                                                                                                                                                                                                                                                                                                                                                                                                                                                                                                                                                                            |
| GRMZM2G109070    | -154 | No Description                                                                                                                                                                                                                                                                                                                                                                                                                                                                                                                                                                                                            |
| GRMZM2G023798    | -19  | catalytic activity intramolecular transferase activity                                                                                                                                                                                                                                                                                                                                                                                                                                                                                                                                                                    |
| GRMZM2G041878    | -127 | No Description                                                                                                                                                                                                                                                                                                                                                                                                                                                                                                                                                                                                            |
| GRMZM2G105331    | -176 | No Description                                                                                                                                                                                                                                                                                                                                                                                                                                                                                                                                                                                                            |
| GRMZM2G138423    | -53  | transporter activity binding mitochondrial inner membrane transport membrane transmembrane transport                                                                                                                                                                                                                                                                                                                                                                                                                                                                                                                      |
| GRMZM2G039089    | -15  | protein folding heat shock protein binding unfolded protein binding                                                                                                                                                                                                                                                                                                                                                                                                                                                                                                                                                       |
| GRMZM2G101523    | -43  | zinc ion binding                                                                                                                                                                                                                                                                                                                                                                                                                                                                                                                                                                                                          |
| GRMZM2G079682    | -100 | beta-1,4-mannosylglucosyltransferase activity protein amino acid N-linked glycosylation membrane                                                                                                                                                                                                                                                                                                                                                                                                                                                                                                                          |
| GRMZM2G128902    | -190 | No Description                                                                                                                                                                                                                                                                                                                                                                                                                                                                                                                                                                                                            |
| GRMZM2G0859330   | -33  | No Description                                                                                                                                                                                                                                                                                                                                                                                                                                                                                                                                                                                                            |
| GRMZM2G463711    | -90  | No Description                                                                                                                                                                                                                                                                                                                                                                                                                                                                                                                                                                                                            |
| GRMZM2G702126    | -41  | No Description                                                                                                                                                                                                                                                                                                                                                                                                                                                                                                                                                                                                            |
| GRMZM2G056762    | -40  | No Description                                                                                                                                                                                                                                                                                                                                                                                                                                                                                                                                                                                                            |
| GRMZM2G090419    | -25  | hydrolyase activity                                                                                                                                                                                                                                                                                                                                                                                                                                                                                                                                                                                                       |
| GRMZM2G130548    | -99  | No Description                                                                                                                                                                                                                                                                                                                                                                                                                                                                                                                                                                                                            |
| GRMZM2G072300    | -76  | heat shock protein binding                                                                                                                                                                                                                                                                                                                                                                                                                                                                                                                                                                                                |

|                  |      |                                                                                                                                                                                                                                                                                                                            |
|------------------|------|----------------------------------------------------------------------------------------------------------------------------------------------------------------------------------------------------------------------------------------------------------------------------------------------------------------------------|
| GRMZM2G086027    | -41  | No Description                                                                                                                                                                                                                                                                                                             |
| GRMZM2G119769    | -57  | homoiothermy ice binding response to freezing                                                                                                                                                                                                                                                                              |
| GRMZM2G465769    | -150 | No Description                                                                                                                                                                                                                                                                                                             |
| GRMZM2G017869    | -80  | lipid metabolic process hydrolase activity, acting on ester bonds                                                                                                                                                                                                                                                          |
| GRMZM2G385818    | -163 | chromatin DNA binding RNA binding structural constituent of ribosome nucleus regulation of transcription, DNA-dependent translation                                                                                                                                                                                        |
| GRMZM2G076212    | -22  | protein kinase activity protein serine/threonine kinase activity ATP binding protein amino acid phosphorylation                                                                                                                                                                                                            |
| GRMZM2G081886    | -182 | phosphopyruvate dehydrogenase activity L-serine biosynthetic process potassium ion transport metabolic process cation transmembrane transporter activity amino acid binding oxidoreductase activity, acting on the CH-OH group of donors, NAD or NADP as acceptor cofactor binding NAD or NADH binding oxidation reduction |
| GRMZM2G055844    | -194 | protein kinase activity protein serine/threonine kinase activity protein binding ATP binding protein amino acid phosphorylation                                                                                                                                                                                            |
| GRMZM2G106010    | -99  | No Description                                                                                                                                                                                                                                                                                                             |
| GRMZM2G0825909   | -68  | No Description                                                                                                                                                                                                                                                                                                             |
| GRMZM2G039711    | -20  | No Description                                                                                                                                                                                                                                                                                                             |
| GRMZM2G178709    | -64  | No Description                                                                                                                                                                                                                                                                                                             |
| GRMZM2G147268    | -171 | cellular amino acid metabolic process biosynthetic process transferase activity, transferring nitrogenous groups lyase activity pyridoxal phosphate binding                                                                                                                                                                |
| GRMZM2G457697    | -52  | No Description                                                                                                                                                                                                                                                                                                             |
| GRMZM2G138770    | -104 | nucleotide binding ATP binding nucleoside-triphosphatase activity                                                                                                                                                                                                                                                          |
| GRMZM2G441748    | -118 | No Description                                                                                                                                                                                                                                                                                                             |
| GRMZM2G050925    | -19  | No Description                                                                                                                                                                                                                                                                                                             |
| GRMZM2G147685    | -56  | nucleus transcription regulator activity regulation of transcription                                                                                                                                                                                                                                                       |
| GRMZM2G025042    | -66  | No Description                                                                                                                                                                                                                                                                                                             |
| GRMZM2G059030    | -154 | No Description                                                                                                                                                                                                                                                                                                             |
| GRMZM2G013357    | -99  | monooxygenase activity iron ion binding electron carrier activity heme binding oxidation reduction                                                                                                                                                                                                                         |
| GRMZM2G178199    | -32  | No Description                                                                                                                                                                                                                                                                                                             |
| GRMZM2G703185    | -70  | No Description                                                                                                                                                                                                                                                                                                             |
| GRMZM2G145666    | -49  | structural constituent of cell wall                                                                                                                                                                                                                                                                                        |
| GRMZM2G703193    | -31  | No Description                                                                                                                                                                                                                                                                                                             |
| GRMZM2G180691    | -188 | hydrolase activity                                                                                                                                                                                                                                                                                                         |
| GRMZM2G0503606   | -138 | No Description                                                                                                                                                                                                                                                                                                             |
| GRMZM2G066638    | -115 | motor activity ATP binding myosin complex                                                                                                                                                                                                                                                                                  |
| GRMZM2G067756    | -39  | No Description                                                                                                                                                                                                                                                                                                             |
| GRMZM2G146685    | -113 | No Description                                                                                                                                                                                                                                                                                                             |
| GRMZM2G037574    | -8   | intracellular zinc ion binding                                                                                                                                                                                                                                                                                             |
| GRMZM2G002053    | -27  | type I hypersensitivity homoiothermy ice binding response to freezing                                                                                                                                                                                                                                                      |
| GRMZM2G015409    | -87  | protein binding zinc ion binding                                                                                                                                                                                                                                                                                           |
| GRMZM2G379563    | -118 | No Description                                                                                                                                                                                                                                                                                                             |
| GRMZM2G158629    | -163 | cysteine-type endopeptidase activity fatty acid synthase activity fatty acid synthase complex proteolysis fatty acid biosynthetic process metabolic process oxidoreductase activity oxidation reduction                                                                                                                    |
| GRMZM2G703338    | -142 | No Description                                                                                                                                                                                                                                                                                                             |
| GRMZM2G016106    | -12  | nucleic acid binding                                                                                                                                                                                                                                                                                                       |
| AC219035.2 FG006 | -136 | No Description                                                                                                                                                                                                                                                                                                             |
| GRMZM2G128771    | -29  | GTPase activity protein binding GTP binding intracellular intracellular protein transport nucleocytoplasmic transport signal transduction small GTPase mediated signal transduction protein transport                                                                                                                      |
| GRMZM2G350773    | -12  | No Description                                                                                                                                                                                                                                                                                                             |
| GRMZM2G103881    | -131 | No Description                                                                                                                                                                                                                                                                                                             |
| GRMZM2G062019    | -134 | metabolic process hydrolase activity                                                                                                                                                                                                                                                                                       |
| GRMZM2G062019    | -128 | metabolic process hydrolase activity                                                                                                                                                                                                                                                                                       |
| GRMZM2G062019    | -122 | metabolic process hydrolase activity                                                                                                                                                                                                                                                                                       |
| GRMZM2G062019    | -116 | metabolic process hydrolase activity                                                                                                                                                                                                                                                                                       |
| GRMZM2G056329    | -82  | ATP binding                                                                                                                                                                                                                                                                                                                |
| GRMZM2G022763    | -137 | nucleic acid binding RNA binding nucleus mRNA processing                                                                                                                                                                                                                                                                   |
| GRMZM2G001388    | -63  | protein binding                                                                                                                                                                                                                                                                                                            |
| GRMZM2G398758    | -68  | DNA binding                                                                                                                                                                                                                                                                                                                |
| GRMZM2G345270    | -11  | sugar:hydrogen symporter activity transport phosphoenolpyruvate-dependent sugar phosphotransferase system                                                                                                                                                                                                                  |
| GRMZM2G035482    | -61  | No Description                                                                                                                                                                                                                                                                                                             |
| GRMZM2G308910    | -11  | DNA binding structural constituent of ribosome ligand-dependent nuclear receptor activity intracellular nucleus ribosome regulation of transcription, DNA-dependent translation                                                                                                                                            |
| GRMZM2G390236    | -180 | No Description                                                                                                                                                                                                                                                                                                             |
| GRMZM2G336879    | -21  | ribonucleoside-diphosphate reductase activity ribonucleoside-diphosphate reductase complex DNA replication                                                                                                                                                                                                                 |
| GRMZM2G336929    | -12  | transferase activity, transferring glycosyl groups                                                                                                                                                                                                                                                                         |
| GRMZM2G013471    | -30  | No Description                                                                                                                                                                                                                                                                                                             |
| GRMZM2G170307    | -31  | heat shock protein binding                                                                                                                                                                                                                                                                                                 |
| AC200904.3 FG003 | -42  | No Description                                                                                                                                                                                                                                                                                                             |
| GRMZM2G013971    | -135 | ubiquitin ligase complex ubiquitin-protein ligase activity protein binding zinc ion binding protein ubiquitination                                                                                                                                                                                                         |
| GRMZM2G046924    | -40  | transferase activity                                                                                                                                                                                                                                                                                                       |
| GRMZM2G010384    | -151 | No Description                                                                                                                                                                                                                                                                                                             |
| GRMZM2G081912    | -151 | ubiquitin ligase complex ubiquitin-protein ligase activity protein binding zinc ion binding protein ubiquitination                                                                                                                                                                                                         |
| GRMZM2G701533    | -191 | No Description                                                                                                                                                                                                                                                                                                             |
| GRMZM2G038356    | -71  | GTP binding intracellular intracellular protein transport small GTPase mediated signal transduction                                                                                                                                                                                                                        |
| AC205833.3 FG002 | -52  | No Description                                                                                                                                                                                                                                                                                                             |
| GRMZM2G457411    | -39  | protein binding zinc ion binding                                                                                                                                                                                                                                                                                           |
| GRMZM2G053692    | -61  | structural molecule activity protein binding retrograde vesicle-mediated transport, Golgi to ER COPI vesicle coat                                                                                                                                                                                                          |
| GRMZM2G138268    | -21  | nucleus regulation of transcription                                                                                                                                                                                                                                                                                        |
| GRMZM2G366142    | -91  | No Description                                                                                                                                                                                                                                                                                                             |
| GRMZM2G013016    | -109 | No Description                                                                                                                                                                                                                                                                                                             |
| GRMZM2G053284    | -49  | protein binding ATP binding                                                                                                                                                                                                                                                                                                |
| GRMZM2G177518    | -179 | No Description                                                                                                                                                                                                                                                                                                             |
| GRMZM2G004314    | -184 | No Description                                                                                                                                                                                                                                                                                                             |
| GRMZM2G065290    | -72  | transcription factor activity sequence-specific DNA binding regulation of transcription                                                                                                                                                                                                                                    |
| GRMZM2G031704    | -17  | dihydroorotase activity hydrolase activity hydrolase activity, acting on carbon-nitrogen (but not peptide) bonds, in cyclic amides pyrimidine base biosynthetic process                                                                                                                                                    |
| GRMZM2G039246    | -131 | two-component signal transduction system (phosphorelay) signal transducer activity                                                                                                                                                                                                                                         |
| GRMZM2G702144    | -71  | No Description                                                                                                                                                                                                                                                                                                             |
| GRMZM2G159724    | -17  | malic enzyme activity malate metabolic process oxidoreductase activity oxidoreductase activity, acting on the CH-OH group of donors, NAD or NADP as acceptor metal ion binding NAD or NADH binding oxidation reduction                                                                                                     |
| GRMZM2G0814782   | -186 | No Description                                                                                                                                                                                                                                                                                                             |
| GRMZM2G0814803   | -24  | No Description                                                                                                                                                                                                                                                                                                             |
| AC155377.1 FG002 | -55  | aspartic-type endopeptidase activity proteolysis                                                                                                                                                                                                                                                                           |
| GRMZM2G481362    | -119 | hydrolase activity                                                                                                                                                                                                                                                                                                         |
| GRMZM2G467147    | -154 | protein binding defense response                                                                                                                                                                                                                                                                                           |
| GRMZM2G066978    | -152 | No Description                                                                                                                                                                                                                                                                                                             |
| GRMZM2G130173    | -117 | structural constituent of ribosome intracellular ribosome translation homoiothermy metal ion binding ice binding response to freezing                                                                                                                                                                                      |

|                  |      |                                                                                                                                                                                                                                                                           |
|------------------|------|---------------------------------------------------------------------------------------------------------------------------------------------------------------------------------------------------------------------------------------------------------------------------|
| GRMZM5G844094    | -138 | zinc ion binding                                                                                                                                                                                                                                                          |
| AC203768.3 FG005 | -153 | metalloendopeptidase activity proteolysis membrane                                                                                                                                                                                                                        |
| GRMZM2G027253    | -199 | DNA binding regulation of transcription, DNA-dependent                                                                                                                                                                                                                    |
| GRMZM2G119865    | -9   | DNA binding transcription factor activity structural constituent of ribosome intracellular ribosome regulation of transcription, DNA-dependent translation                                                                                                                |
| GRMZM2G169333    | -146 | nucleic acid binding damaged DNA binding DNA-(apurinic or apyrimidinic site) lyase activity DNA repair base-excision repair nucleotide-excision repair zinc ion binding oxidized purine base lesion DNA N-glycosylase activity hydrolase activity, hydrolyzing N-glycosyl |
| GRMZM2G073470    | -156 | electron carrier activity                                                                                                                                                                                                                                                 |
| GRMZM2G406413    | -140 | DNA binding DNA-directed RNA polymerase activity nucleus transcription                                                                                                                                                                                                    |
| GRMZM2G095404    | -63  | peroxidase activity response to oxidative stress heme binding oxidation reduction                                                                                                                                                                                         |
| AC187885.3 FG002 | -72  | No Description                                                                                                                                                                                                                                                            |
| GRMZM2G127080    | -181 | No Description                                                                                                                                                                                                                                                            |
| GRMZM2G061492    | -30  | cysteine-type endopeptidase activity protein binding proteolysis                                                                                                                                                                                                          |
| GRMZM2G358491    | -90  | No Description                                                                                                                                                                                                                                                            |
| GRMZM2G378167    | -60  | No Description                                                                                                                                                                                                                                                            |
| GRMZM2G047607    | -190 | No Description                                                                                                                                                                                                                                                            |
| GRMZM2G322220    | -196 | transporter activity oligopeptide transport membrane                                                                                                                                                                                                                      |
| GRMZM2G070075    | -141 | No Description                                                                                                                                                                                                                                                            |
| GRMZM2G371058    | -152 | DNA binding zinc ion binding regulation of transcription                                                                                                                                                                                                                  |
| GRMZM5G804893    | -123 | DNA binding intracellular nucleus regulation of transcription, DNA-dependent sequence-specific DNA binding                                                                                                                                                                |
| GRMZM2G039173    | -63  | membrane                                                                                                                                                                                                                                                                  |
| AC226373.2 FG009 | -124 | No Description                                                                                                                                                                                                                                                            |
| GRMZM2G375904    | -14  | protein kinase activity protein serine/threonine kinase activity ATP binding protein amino acid phosphorylation                                                                                                                                                           |
| GRMZM2G440452    | -73  | type I hypersensitivity                                                                                                                                                                                                                                                   |
| GRMZM2G036837    | -125 | nucleic acid binding zinc ion binding                                                                                                                                                                                                                                     |
| GRMZM2G017285    | -171 | catalytic activity 3-beta-hydroxy-delta5-steroid dehydrogenase activity steroid biosynthetic process biosynthetic process cellular metabolic process coenzyme binding                                                                                                     |
| GRMZM2G056145    | -181 | nucleic acid binding zinc ion binding homiothermy ice binding response to freezing                                                                                                                                                                                        |
| GRMZM2G473485    | -76  | No Description                                                                                                                                                                                                                                                            |
| GRMZM2G111898    | -99  | No Description                                                                                                                                                                                                                                                            |
| GRMZM2G450228    | -197 | No Description                                                                                                                                                                                                                                                            |
| GRMZM2G107556    | -193 | No Description                                                                                                                                                                                                                                                            |
| GRMZM2G477221    | -186 | binding                                                                                                                                                                                                                                                                   |
| GRMZM2G035395    | -182 | binding                                                                                                                                                                                                                                                                   |
| GRMZM2G389510    | -10  | No Description                                                                                                                                                                                                                                                            |
| GRMZM2G372985    | -183 | No Description                                                                                                                                                                                                                                                            |
| GRMZM5G860590    | -26  | No Description                                                                                                                                                                                                                                                            |
| GRMZM2G154881    | -82  | hydrolase activity                                                                                                                                                                                                                                                        |
| GRMZM2G078723    | -21  | No Description                                                                                                                                                                                                                                                            |
| GRMZM2G142919    | -132 | tumor necrosis factor receptor binding immune response membrane transmembrane transport                                                                                                                                                                                   |
| GRMZM2G334105    | -22  | No Description                                                                                                                                                                                                                                                            |
| GRMZM2G447005    | -22  | No Description                                                                                                                                                                                                                                                            |
| GRMZM2G700569    | -18  | No Description                                                                                                                                                                                                                                                            |
| GRMZM2G349074    | -95  | No Description                                                                                                                                                                                                                                                            |
| GRMZM2G303168    | -19  | No Description                                                                                                                                                                                                                                                            |
| GRMZM5G856391    | -190 | No Description                                                                                                                                                                                                                                                            |
| GRMZM2G139574    | -152 | transferase activity, transferring qlvcosyl groups                                                                                                                                                                                                                        |
| GRMZM2G162868    | -151 | No Description                                                                                                                                                                                                                                                            |
| GRMZM2G479869    | -95  | No Description                                                                                                                                                                                                                                                            |
| GRMZM2G375222    | -171 | transcription elongation regulator activity membrane positive regulation of RNA elongation from RNA polymerase II promoter protein homooligomerization                                                                                                                    |
| GRMZM2G141873    | -17  | No Description                                                                                                                                                                                                                                                            |
| GRMZM2G456835    | -189 | response to stress                                                                                                                                                                                                                                                        |
| GRMZM2G100146    | -197 | ossification intracellular cell adhesion zinc ion binding                                                                                                                                                                                                                 |
| GRMZM2G361066    | -26  | nucleotide binding ATP-dependent peptidase activity serine-type endopeptidase activity ATP binding proteolysis membrane ATPase activity nucleoside-triphosphatase activity                                                                                                |
| GRMZM2G063672    | -121 | nucleotide binding ATP binding nucleoside-triphosphatase activity                                                                                                                                                                                                         |
| GRMZM2G014066    | -167 | No Description                                                                                                                                                                                                                                                            |
| GRMZM2G307756    | -75  | No Description                                                                                                                                                                                                                                                            |
| GRMZM5G873546    | -88  | No Description                                                                                                                                                                                                                                                            |
| GRMZM2G029292    | -189 | transcription factor activity sequence-specific DNA binding regulation of transcription                                                                                                                                                                                   |
| GRMZM5G806622    | -108 | No Description                                                                                                                                                                                                                                                            |
| GRMZM2G173868    | -198 | mannosyl-oligosaccharide 1,2-alpha-mannosidase activity calcium ion binding membrane                                                                                                                                                                                      |
| GRMZM2G076450    | -82  | protein binding                                                                                                                                                                                                                                                           |
| GRMZM2G116273    | -22  | No Description                                                                                                                                                                                                                                                            |
| GRMZM2G110714    | -136 | catalytic activity tricarboxylic acid cycle phosphoenolpyruvate carboxylase activity carbon fixation                                                                                                                                                                      |
| GRMZM2G420772    | -184 | No Description                                                                                                                                                                                                                                                            |
| GRMZM2G555108    | -16  | No Description                                                                                                                                                                                                                                                            |
| GRMZM2G012031    | -88  | protein binding                                                                                                                                                                                                                                                           |
| GRMZM2G107408    | -163 | No Description                                                                                                                                                                                                                                                            |
| GRMZM2G344323    | -161 | No Description                                                                                                                                                                                                                                                            |
| GRMZM5G884407    | -18  | No Description                                                                                                                                                                                                                                                            |
| GRMZM2G410033    | -189 | amino acid transport membrane                                                                                                                                                                                                                                             |
| GRMZM5G874483    | -165 | No Description                                                                                                                                                                                                                                                            |
| GRMZM2G396540    | -17  | No Description                                                                                                                                                                                                                                                            |
| GRMZM2G125175    | -185 | No Description                                                                                                                                                                                                                                                            |
| GRMZM2G109299    | -158 | No Description                                                                                                                                                                                                                                                            |
| GRMZM2G355631    | -102 | No Description                                                                                                                                                                                                                                                            |
| GRMZM2G024615    | -66  | catalytic activity membrane                                                                                                                                                                                                                                               |
| GRMZM2G315431    | -63  | ubiquitin ligase complex ubiquitin-protein ligase activity binding protein ubiquitination                                                                                                                                                                                 |
| GRMZM2G414813    | -30  | transporter activity transport membrane transmembrane transport                                                                                                                                                                                                           |
| GRMZM2G339214    | -135 | No Description                                                                                                                                                                                                                                                            |
| GRMZM2G146673    | -17  | protein folding heat shock protein binding unfolded protein binding                                                                                                                                                                                                       |
| GRMZM2G307588    | -131 | DNA binding nucleus                                                                                                                                                                                                                                                       |
| AC225790.2 FG003 | -86  | structural molecule activity cell adhesion actin cytoskeleton homiothermy ice binding response to freezing                                                                                                                                                                |
| GRMZM2G435015    | -164 | nucleus transcription regulator activity regulation of transcription                                                                                                                                                                                                      |
| AC212732.4 FG005 | -175 | No Description                                                                                                                                                                                                                                                            |
| AC191264.3 FG003 | -122 | No Description                                                                                                                                                                                                                                                            |
| GRMZM2G150683    | -17  | extracellular region iron ion transport cellular iron ion homeostasis ferric iron binding                                                                                                                                                                                 |
| GRMZM2G434696    | -180 | No Description                                                                                                                                                                                                                                                            |
| GRMZM2G702283    | -41  | No Description                                                                                                                                                                                                                                                            |

|                  |      |                                                                                                                                                                                                                                         |
|------------------|------|-----------------------------------------------------------------------------------------------------------------------------------------------------------------------------------------------------------------------------------------|
| GRMZM2G443939    | -33  | protein binding ATP binding apoptosis defense response                                                                                                                                                                                  |
| GRMZM2G003625    | -52  | protein binding ATP binding apoptosis defense response                                                                                                                                                                                  |
| GRMZM2G163550    | -184 | protein kinase activity ATP binding sugar binding protein amino acid phosphorylation recognition of pollen                                                                                                                              |
| GRMZM2G571844    | -121 | binding                                                                                                                                                                                                                                 |
| AC203316.3 FG003 | -108 | No Description                                                                                                                                                                                                                          |
| GRMZM2G142955    | -24  | No Description                                                                                                                                                                                                                          |
| GRMZM2G420774    | -14  | nucleic acid binding                                                                                                                                                                                                                    |
| GRMZM2G123644    | -141 | DNA binding RNA binding                                                                                                                                                                                                                 |
| GRMZM2G109142    | -154 | No Description                                                                                                                                                                                                                          |
| AC203570.4 FG005 | -186 | No Description                                                                                                                                                                                                                          |
| GRMZM2G481009    | -28  | No Description                                                                                                                                                                                                                          |
| GRMZM2G133233    | -81  | No Description                                                                                                                                                                                                                          |
| GRMZM2G396049    | -54  | RNA binding RNA processing                                                                                                                                                                                                              |
| GRMZM2G396049    | -47  | RNA binding RNA processing                                                                                                                                                                                                              |
| GRMZM2G315885    | -53  | RNA binding RNA processing                                                                                                                                                                                                              |
| GRMZM2G025243    | -188 | alcohol dehydrogenase (NAD) activity metabolic process 2,3-dihydro-2,3-dihydroxybenzoate dehydrogenase activity enterobactin biosynthetic process oxidoreductase activity oxidation reduction                                           |
| GRMZM5G896983    | -18  | No Description                                                                                                                                                                                                                          |
| GRMZM2G005456    | -9   | No Description                                                                                                                                                                                                                          |
| GRMZM2G059308    | -60  | monooxygenase activity iron ion binding electron carrier activity heme binding oxidation reduction                                                                                                                                      |
| GRMZM2G087806    | -88  | zinc ion binding                                                                                                                                                                                                                        |
| GRMZM2G316827    | -196 | No Description                                                                                                                                                                                                                          |
| GRMZM2G426229    | -50  | nucleic acid binding ATP binding                                                                                                                                                                                                        |
| GRMZM2G438722    | -178 | calcium ion binding zinc ion binding                                                                                                                                                                                                    |
| GRMZM2G024718    | -8   | ATP binding                                                                                                                                                                                                                             |
| GRMZM2G086934    | -180 | nucleic acid binding DNA binding nucleus DNA replication                                                                                                                                                                                |
| GRMZM2G386990    | -36  | acid phosphatase activity hydrolase activity metal ion binding                                                                                                                                                                          |
| GRMZM2G065259    | -18  | cysteine-type endopeptidase inhibitor activity hormone activity structural molecule activity structural constituent of cell wall extracellular region cell adhesion actin cytoskeleton                                                  |
| GRMZM2G174070    | -177 | DNA binding regulation of transcription                                                                                                                                                                                                 |
| GRMZM2G064600    | -39  | catalytic activity binding mitochondrial inner membrane metabolic process protein transporter activity protein transport                                                                                                                |
| GRMZM2G092723    | -76  | DNA binding DNA topoisomerase activity ATP binding chromosome DNA topological change                                                                                                                                                    |
| GRMZM2G413337    | -35  | No Description                                                                                                                                                                                                                          |
| GRMZM2G464818    | -26  | No Description                                                                                                                                                                                                                          |
| GRMZM2G148855    | -14  | No Description                                                                                                                                                                                                                          |
| GRMZM2G457118    | -181 | No Description                                                                                                                                                                                                                          |
| GRMZM2G160428    | -58  | protein kinase activity protein serine/threonine kinase activity ATP binding protein amino acid phosphorylation                                                                                                                         |
| GRMZM2G100086    | -36  | DNA binding transcription factor activity structural constituent of ribosome intracellular ribosome transcription initiation regulation of transcription, DNA-dependent translation sigma factor activity sequence-specific DNA binding |
| GRMZM2G441827    | -108 | No Description                                                                                                                                                                                                                          |
| GRMZM2G084940    | -16  | catalytic activity                                                                                                                                                                                                                      |
| GRMZM2G180889    | -138 | L-arabinose metabolic process alpha-N-arabinofuranosidase activity                                                                                                                                                                      |
| GRMZM2G703650    | -87  | No Description                                                                                                                                                                                                                          |
| GRMZM2G119249    | -9   | shikimate kinase activity ATP binding                                                                                                                                                                                                   |
| GRMZM2G546081    | -9   | biosynthetic process                                                                                                                                                                                                                    |
| GRMZM2G127739    | -88  | signal transducer activity signal transduction G-protein coupled receptor protein signaling pathway zinc ion binding quanyl nucleotide binding                                                                                          |
| GRMZM2G151236    | -107 | protein kinase activity protein serine/threonine kinase activity ATP binding protein amino acid phosphorylation                                                                                                                         |
| AC208564.3 FG004 | -121 | transcription factor activity nucleus regulation of transcription, DNA-dependent                                                                                                                                                        |
| GRMZM2G003004    | -76  | No Description                                                                                                                                                                                                                          |
| AC206030.4 FG001 | -96  | drug transmembrane transport drug transmembrane transporter activity antiporter activity membrane transmembrane transport                                                                                                               |
| GRMZM2G134735    | -84  | nucleus transcription regulator activity regulation of transcription                                                                                                                                                                    |
| GRMZM2G117189    | -19  | No Description                                                                                                                                                                                                                          |
| GRMZM2G180575    | -83  | integral to membrane                                                                                                                                                                                                                    |
| GRMZM2G429940    | -195 | protein kinase activity protein serine/threonine kinase activity ATP binding protein amino acid phosphorylation signal transduction                                                                                                     |
| GRMZM2G124281    | -135 | mitochondrial matrix                                                                                                                                                                                                                    |
| GRMZM2G078412    | -17  | RNA binding                                                                                                                                                                                                                             |
| GRMZM2G068639    | -100 | catalytic activity D-arabinono-1,4-lactone oxidase activity serine-type carboxypeptidase activity proteolysis membrane oxidoreductase activity FAD binding oxidation reduction                                                          |
| GRMZM2G067626    | -13  | No Description                                                                                                                                                                                                                          |
| GRMZM2G113053    | -141 | No Description                                                                                                                                                                                                                          |
| GRMZM2G113053    | -131 | No Description                                                                                                                                                                                                                          |
| GRMZM2G383338    | -142 | No Description                                                                                                                                                                                                                          |
| GRMZM2G039639    | -104 | No Description                                                                                                                                                                                                                          |
| GRMZM2G436429    | -145 | intracellular protein transport membrane                                                                                                                                                                                                |
| GRMZM2G351304    | -42  | transcription factor activity signal transducer activity regulation of transcription, DNA-dependent signal transduction                                                                                                                 |
| GRMZM2G164084    | -36  | DNA binding transcription factor activity structural constituent of ribosome intracellular ribosome transcription initiation regulation of transcription, DNA-dependent translation sigma factor activity sequence-specific DNA binding |
| AC197054.3 FG002 | -67  | No Description                                                                                                                                                                                                                          |
| GRMZM2G164088    | -33  | nucleic acid binding                                                                                                                                                                                                                    |
| GRMZM2G070381    | -110 | No Description                                                                                                                                                                                                                          |
| GRMZM2G312091    | -39  | No Description                                                                                                                                                                                                                          |
| GRMZM2G301805    | -73  | No Description                                                                                                                                                                                                                          |
| GRMZM2G018254    | -10  | No Description                                                                                                                                                                                                                          |
| GRMZM5G881498    | -129 | No Description                                                                                                                                                                                                                          |
| GRMZM2G009854    | -56  | No Description                                                                                                                                                                                                                          |
| GRMZM2G118534    | -145 | No Description                                                                                                                                                                                                                          |
| GRMZM2G023152    | -30  | serine-type endopeptidase inhibitor activity methyltransferase activity O-methyltransferase activity protein dimerization activity                                                                                                      |
| GRMZM2G165137    | -50  | nucleic acid binding ATP binding cytoplasm metabolic process kinase activity phosphotransferase activity, alcohol group as acceptor                                                                                                     |
| GRMZM2G026724    | -117 | protein binding                                                                                                                                                                                                                         |
| GRMZM2G123257    | -53  | No Description                                                                                                                                                                                                                          |
| GRMZM2G059325    | -47  | No Description                                                                                                                                                                                                                          |
| GRMZM2G113252    | -94  | No Description                                                                                                                                                                                                                          |
| AC185305.3 FG003 | -186 | No Description                                                                                                                                                                                                                          |
| GRMZM2G070422    | -42  | metabolic process oxidoreductase activity oxidation reduction                                                                                                                                                                           |
| GRMZM5G822573    | -57  | No Description                                                                                                                                                                                                                          |
| GRMZM2G112228    | -13  | integral to membrane vesicle-mediated transport                                                                                                                                                                                         |
| GRMZM2G045573    | -16  | No Description                                                                                                                                                                                                                          |
| GRMZM2G106308    | -76  | DNA binding binding                                                                                                                                                                                                                     |
| GRMZM2G106308    | -31  | DNA binding binding                                                                                                                                                                                                                     |
| GRMZM2G161731    | -12  | No Description                                                                                                                                                                                                                          |
| GRMZM2G070343    | -25  | glycerol ether metabolic process electron carrier activity protein disulfide oxidoreductase activity cell redox homeostasis                                                                                                             |

|                  |      |                                                                                                                                                                                                                                           |
|------------------|------|-------------------------------------------------------------------------------------------------------------------------------------------------------------------------------------------------------------------------------------------|
| GRMZM2G150706    | -161 | type I hypersensitivity homiothermy ice binding response to freezing                                                                                                                                                                      |
| GRMZM2G164854    | -116 | No Description                                                                                                                                                                                                                            |
| GRMZM2G475867    | -28  | No Description                                                                                                                                                                                                                            |
| GRMZM2G181359    | -20  | nucleotide binding ATP binding cytoplasm hydrolase activity nucleoside-triphosphatase activity protein catabolic process                                                                                                                  |
| GRMZM2G433528    | -68  | hydrolase activity, hydrolyzing O-glycosyl compounds carbohydrate metabolic process                                                                                                                                                       |
| GRMZM2G003452    | -94  | ATP binding apoptosis defense response                                                                                                                                                                                                    |
| GRMZM2G363437    | -157 | nucleus                                                                                                                                                                                                                                   |
| GRMZM2G305446    | -45  | transporter activity transport membrane integral to membrane transmembrane transport                                                                                                                                                      |
| GRMZM2G123480    | -105 | No Description                                                                                                                                                                                                                            |
| GRMZM2G701459    | -126 | No Description                                                                                                                                                                                                                            |
| GRMZM2G341747    | -16  | calmodulin binding nucleus transcription regulator activity regulation of transcription                                                                                                                                                   |
| GRMZM2G5829728   | -43  | No Description                                                                                                                                                                                                                            |
| GRMZM2G169699    | -119 | No Description                                                                                                                                                                                                                            |
| GRMZM2G030013    | -60  | RNA binding                                                                                                                                                                                                                               |
| GRMZM2G406165    | -17  | No Description                                                                                                                                                                                                                            |
| GRMZM2G340762    | -158 | homoserine kinase activity ATP binding threonine metabolic process                                                                                                                                                                        |
| GRMZM2G105494    | -66  | nucleus transcription regulator activity regulation of transcription                                                                                                                                                                      |
| GRMZM2G021110    | -49  | aminopeptidase activity cellular process manganese ion binding                                                                                                                                                                            |
| GRMZM2G136143    | -66  | binding homiothermy ice binding response to freezing                                                                                                                                                                                      |
| GRMZM2G412136    | -167 | monooxygenase activity iron ion binding G-protein coupled receptor protein signaling pathway electron carrier activity integral to membrane heme binding                                                                                  |
| GRMZM2G124577    | -77  | No Description                                                                                                                                                                                                                            |
| GRMZM2G081955    | -25  | No Description                                                                                                                                                                                                                            |
| GRMZM2G702112    | -129 | No Description                                                                                                                                                                                                                            |
| GRMZM2G064695    | -37  | catalytic activity metabolic process                                                                                                                                                                                                      |
| GRMZM2G130167    | -97  | nucleic acid binding protein binding zinc ion binding                                                                                                                                                                                     |
| GRMZM2G046244    | -93  | No Description                                                                                                                                                                                                                            |
| GRMZM2G140739    | -34  | structural constituent of ribosome intracellular ribosome translation                                                                                                                                                                     |
| GRMZM2G020040    | -77  | ATP binding G-protein coupled receptor protein signaling pathway integral to membrane                                                                                                                                                     |
| GRMZM2G020799    | -162 | transcription factor activity nucleus regulation of transcription, DNA-dependent sequence-specific DNA binding protein dimerization activity                                                                                              |
| GRMZM2G357443    | -107 | exocyst exocytosis                                                                                                                                                                                                                        |
| GRMZM2G105180    | -46  | No Description                                                                                                                                                                                                                            |
| GRMZM2G380582    | -63  | No Description                                                                                                                                                                                                                            |
| GRMZM2G009413    | -14  | No Description                                                                                                                                                                                                                            |
| GRMZM2G159161    | -10  | signal transducer activity protein binding nitrogen fixation response to light stimulus nitrogenase activity                                                                                                                              |
| GRMZM2G115598    | -38  | translation initiation factor activity eukaryotic translation initiation factor 3 complex translational initiation                                                                                                                        |
| GRMZM2G081753    | -43  | No Description                                                                                                                                                                                                                            |
| GRMZM2G478701    | -192 | No Description                                                                                                                                                                                                                            |
| GRMZM2G0831795   | -97  | metabolic process hydrolase activity                                                                                                                                                                                                      |
| GRMZM2G041876    | -82  | nucleic acid binding DNA binding                                                                                                                                                                                                          |
| GRMZM2G089596    | -182 | nucleus transcription regulator activity regulation of transcription                                                                                                                                                                      |
| GRMZM2G057113    | -50  | No Description                                                                                                                                                                                                                            |
| GRMZM2G130230    | -48  | glucose-6-phosphate dehydrogenase activity glucose metabolic process NADP or NADPH binding oxidation reduction                                                                                                                            |
| GRMZM2G094792    | -61  | No Description                                                                                                                                                                                                                            |
| GRMZM2G112039    | -94  | copper-exporting ATPase activity transporter activity ATP binding ATP biosynthetic process oligopeptide transport membrane metal ion transport metal ion transmembrane transporter activity                                               |
| GRMZM2G085260    | -43  | No Description                                                                                                                                                                                                                            |
| GRMZM2G306376    | -23  | No Description                                                                                                                                                                                                                            |
| GRMZM2G143242    | -17  | homiothermy ice binding response to freezing                                                                                                                                                                                              |
| GRMZM2G0891932   | -85  | No Description                                                                                                                                                                                                                            |
| GRMZM2G090122    | -64  | No Description                                                                                                                                                                                                                            |
| GRMZM2G172695    | -63  | No Description                                                                                                                                                                                                                            |
| GRMZM2G108686    | -64  | No Description                                                                                                                                                                                                                            |
| AC206611.3_FG003 | -133 | No Description                                                                                                                                                                                                                            |
| GRMZM2G430607    | -151 | catalytic activity trehalose biosynthetic process                                                                                                                                                                                         |
| GRMZM2G091588    | -79  | monooxygenase activity iron ion binding electron carrier activity heme binding oxidation reduction                                                                                                                                        |
| GRMZM2G459854    | -101 | protein kinase activity protein serine/threonine kinase activity ATP binding protein amino acid phosphorylation metabolic process amino acid binding homiothermy ice binding response to freezing                                         |
| GRMZM2G146745    | -35  | cysteine-type endopeptidase activity proteolysis cysteine-type peptidase activity                                                                                                                                                         |
| GRMZM2G0836167   | -115 | No Description                                                                                                                                                                                                                            |
| GRMZM2G046011    | -49  | structural constituent of ribosome intracellular ribosome translation                                                                                                                                                                     |
| GRMZM2G102903    | -29  | No Description                                                                                                                                                                                                                            |
| GRMZM2G357683    | -10  | nucleotide binding ATP-dependent peptidase activity serine-type endopeptidase activity proteolysis nucleoside-triphosphatase activity                                                                                                     |
| GRMZM2G094955    | -93  | tetracycline:hydrogen antiporter activity tetracycline transport membrane integral to membrane homiothermy response to antibiotic ice binding response to freezing                                                                        |
| GRMZM2G091956    | -142 | lipid metabolic process metabolic process                                                                                                                                                                                                 |
| GRMZM2G034271    | -142 | lipid metabolic process metabolic process                                                                                                                                                                                                 |
| GRMZM2G003182    | -36  | DNA binding transcription factor activity structural constituent of ribosome intracellular ribosome transcription initiation regulation of transcription, DNA-dependent translation sigma factor activity sequence-specific DNA binding   |
| GRMZM2G5822237   | -187 | No Description                                                                                                                                                                                                                            |
| GRMZM2G398758    | -67  | RNA binding                                                                                                                                                                                                                               |
| GRMZM2G082974    | -63  | RNA binding translation elongation factor activity translational frameshifting peptidyl-lysine modification to hypusine ribosome binding positive regulation of translational elongation positive regulation of translational termination |
| GRMZM2G082974    | -58  | RNA binding translation elongation factor activity translational frameshifting peptidyl-lysine modification to hypusine ribosome binding positive regulation of translational elongation positive regulation of translational termination |
| GRMZM2G082974    | -24  | RNA binding translation elongation factor activity translational frameshifting peptidyl-lysine modification to hypusine ribosome binding positive regulation of translational elongation positive regulation of translational termination |
| GRMZM2G026783    | -17  | No Description                                                                                                                                                                                                                            |
| GRMZM2G701337    | -21  | No Description                                                                                                                                                                                                                            |
| GRMZM2G048305    | -25  | No Description                                                                                                                                                                                                                            |
| GRMZM2G5879193   | -79  | No Description                                                                                                                                                                                                                            |
| GRMZM2G396773    | -50  | No Description                                                                                                                                                                                                                            |
| GRMZM2G173280    | -106 | No Description                                                                                                                                                                                                                            |
| GRMZM2G701767    | -17  | No Description                                                                                                                                                                                                                            |
| GRMZM2G136288    | -176 | ATP binding                                                                                                                                                                                                                               |
| GRMZM2G155464    | -141 | No Description                                                                                                                                                                                                                            |
| GRMZM2G127949    | -16  | No Description                                                                                                                                                                                                                            |
| GRMZM2G374030    | -151 | No Description                                                                                                                                                                                                                            |
| GRMZM2G320013    | -172 | No Description                                                                                                                                                                                                                            |
| GRMZM2G324886    | -28  | No Description                                                                                                                                                                                                                            |
| GRMZM2G324886    | -23  | No Description                                                                                                                                                                                                                            |
| GRMZM2G530440    | -51  | No Description                                                                                                                                                                                                                            |
| GRMZM2G098305    | -23  | single-stranded DNA binding                                                                                                                                                                                                               |
| GRMZM2G122028    | -11  | No Description                                                                                                                                                                                                                            |

|                  |      |                                                                                                                                                                                                                                                                                                                               |
|------------------|------|-------------------------------------------------------------------------------------------------------------------------------------------------------------------------------------------------------------------------------------------------------------------------------------------------------------------------------|
| GRMZM5G888620    | -10  | metabolic process transferase activity, transferring hexosyl groups                                                                                                                                                                                                                                                           |
| AC198725.4_FG009 | -106 | transcription factor activity sequence-specific DNA binding regulation of transcription                                                                                                                                                                                                                                       |
| GRMZM2G041015    | -77  | No Description                                                                                                                                                                                                                                                                                                                |
| GRMZM2G090619    | -51  | No Description                                                                                                                                                                                                                                                                                                                |
| GRMZM2G126603    | -168 | structural constituent of ribosome intracellular ribosome translation                                                                                                                                                                                                                                                         |
| GRMZM2G100911    | -9   | protein kinase activity protein serine/threonine kinase activity protein binding ATP binding protein amino acid phosphorylation                                                                                                                                                                                               |
| GRMZM2G108118    | -101 | No Description                                                                                                                                                                                                                                                                                                                |
| GRMZM2G152688    | -8   | protein binding membrane vesicle-mediated transport                                                                                                                                                                                                                                                                           |
| GRMZM5G840946    | -62  | aspartic-type endopeptidase activity proteolysis integral to membrane                                                                                                                                                                                                                                                         |
| GRMZM2G334181    | -81  | No Description                                                                                                                                                                                                                                                                                                                |
| AC213846.4_FG003 | -138 | homoiothermy ice binding response to freezing                                                                                                                                                                                                                                                                                 |
| GRMZM2G012273    | -17  | No Description                                                                                                                                                                                                                                                                                                                |
| GRMZM2G068672    | -37  | DNA binding transcription factor activity nucleus regulation of transcription, DNA-dependent transcription regulator activity homoiothermy sequence-specific DNA binding ice binding response to freezing                                                                                                                     |
| GRMZM2G082874    | -70  | No Description                                                                                                                                                                                                                                                                                                                |
| GRMZM2G100976    | -21  | iron ion binding iron-sulfur cluster assembly iron-sulfur cluster binding                                                                                                                                                                                                                                                     |
| AC209050.3_FG001 | -88  | catalytic activity ATP binding ATP biosynthetic process cation transport metabolic process ATPase activity, coupled to transmembrane movement of ions, phosphorylative mechanism membrane integral to membrane hydrolase activity, acting on acid anhydrides, catalyzing transmembrane movement of substances ATPase activity |
| GRMZM2G144362    | -158 | No Description                                                                                                                                                                                                                                                                                                                |
| GRMZM2G076318    | -79  | lipid transport lipid binding                                                                                                                                                                                                                                                                                                 |
| GRMZM2G076370    | -40  | electron carrier activity                                                                                                                                                                                                                                                                                                     |
| GRMZM2G137108    | -62  | transporter activity transport membrane integral to membrane transmembrane transport                                                                                                                                                                                                                                          |
| GRMZM5G847615    | -21  | No Description                                                                                                                                                                                                                                                                                                                |
| GRMZM2G126582    | -190 | transporter activity transport membrane integral to membrane transmembrane transport                                                                                                                                                                                                                                          |
| GRMZM2G024073    | -48  | cell redox homeostasis                                                                                                                                                                                                                                                                                                        |
| GRMZM2G162702    | -109 | protein kinase activity protein serine/threonine kinase activity ATP binding protein amino acid phosphorylation                                                                                                                                                                                                               |
| GRMZM2G031210    | -72  | No Description                                                                                                                                                                                                                                                                                                                |
| AC215201.3_FG003 | -141 | protein kinase activity protein serine/threonine kinase activity MAP kinase activity ATP binding protein amino acid phosphorylation                                                                                                                                                                                           |
| GRMZM2G133082    | -49  | isopentenyl-diphosphate delta-isomerase activity isoprenoid biosynthetic process hydrolase activity                                                                                                                                                                                                                           |
| GRMZM2G152051    | -9   | No Description                                                                                                                                                                                                                                                                                                                |
| GRMZM2G077498    | -190 | transporter activity oligopeptide transport membrane integral to membrane                                                                                                                                                                                                                                                     |
| GRMZM2G125976    | -9   | transcription factor activity nucleus regulation of transcription, DNA-dependent transcription regulator activity sequence-specific DNA binding                                                                                                                                                                               |
| GRMZM2G0701201   | -88  | protein kinase activity protein serine/threonine kinase activity iron ion binding protein binding ATP binding protein amino acid phosphorylation electron carrier activity heme binding                                                                                                                                       |
| GRMZM2G163459    | -187 | No Description                                                                                                                                                                                                                                                                                                                |
| GRMZM2G163809    | -137 | isoprenoid biosynthetic process cyanelle photosynthesis transferase activity, transferring alkyl or aryl (other than methyl) groups                                                                                                                                                                                           |
| GRMZM2G159028    | -67  | nucleic acid binding                                                                                                                                                                                                                                                                                                          |
| GRMZM2G096812    | -140 | nucleotide binding ATP binding nucleobase, nucleoside, nucleotide and nucleic acid metabolic process nucleoside-triphosphatase activity nucleobase, nucleoside, nucleotide kinase activity                                                                                                                                    |
| GRMZM2G107556    | -196 | No Description                                                                                                                                                                                                                                                                                                                |
| GRMZM2G080588    | -10  | protein kinase activity protein serine/threonine kinase activity ATP binding protein amino acid phosphorylation                                                                                                                                                                                                               |
| GRMZM2G097878    | -80  | protein kinase activity protein serine/threonine kinase activity ATP binding protein amino acid phosphorylation                                                                                                                                                                                                               |
| GRMZM2G097141    | -112 | No Description                                                                                                                                                                                                                                                                                                                |
| GRMZM2G035395    | -70  | binding                                                                                                                                                                                                                                                                                                                       |
| GRMZM2G023840    | -29  | peroxidase activity response to oxidative stress heme binding oxidation reduction                                                                                                                                                                                                                                             |
| GRMZM2G060467    | -45  | structural constituent of ribosome intracellular ribosome translation                                                                                                                                                                                                                                                         |
| GRMZM2G001991    | -23  | catalytic activity 3-beta-hydroxy-delta5-steroid dehydrogenase activity steroid biosynthetic process metabolic process oxidoreductase activity cellular metabolic process coenzyme binding                                                                                                                                    |
| AC187235.3_FG003 | -21  | No Description                                                                                                                                                                                                                                                                                                                |
| GRMZM2G128809    | -9   | nucleic acid binding RNA binding                                                                                                                                                                                                                                                                                              |
| AC19363.4_FG003  | -40  | No Description                                                                                                                                                                                                                                                                                                                |
| GRMZM2G449496    | -67  | No Description                                                                                                                                                                                                                                                                                                                |
| GRMZM5G820808    | -187 | No Description                                                                                                                                                                                                                                                                                                                |
| GRMZM2G415157    | -130 | No Description                                                                                                                                                                                                                                                                                                                |
| GRMZM2G055684    | -144 | serine-type endopeptidase activity proteolysis identical protein binding negative regulation of catalytic activity                                                                                                                                                                                                            |
| AC233864.1_FG014 | -24  | No Description                                                                                                                                                                                                                                                                                                                |
| GRMZM2G005710    | -23  | No Description                                                                                                                                                                                                                                                                                                                |
| GRMZM2G028986    | -10  | heme binding                                                                                                                                                                                                                                                                                                                  |
| AC203855.2_FG001 | -158 | No Description                                                                                                                                                                                                                                                                                                                |
| GRMZM2G013726    | -61  | catalytic activity 3-beta-hydroxy-delta5-steroid dehydrogenase activity steroid biosynthetic process metabolic process oxidoreductase activity cellular metabolic process coenzyme binding                                                                                                                                    |
| GRMZM2G134717    | -194 | DNA binding regulation of transcription                                                                                                                                                                                                                                                                                       |
| GRMZM5G832994    | -65  | No Description                                                                                                                                                                                                                                                                                                                |
| GRMZM2G301853    | -10  | No Description                                                                                                                                                                                                                                                                                                                |
| GRMZM2G066024    | -54  | fructose-bisphosphate aldolase activity glycolysis                                                                                                                                                                                                                                                                            |
| GRMZM2G066024    | -41  | fructose-bisphosphate aldolase activity glycolysis                                                                                                                                                                                                                                                                            |
| GRMZM2G088828    | -24  | No Description                                                                                                                                                                                                                                                                                                                |
| GRMZM2G112799    | -147 | intracellular zinc ion binding                                                                                                                                                                                                                                                                                                |
| GRMZM2G069215    | -30  | ubiquitin ligase complex ubiquitin-protein ligase activity protein binding zinc ion binding protein ubiquitination                                                                                                                                                                                                            |
| GRMZM2G139396    | -30  | No Description                                                                                                                                                                                                                                                                                                                |
| GRMZM2G074479    | -74  | small conjugating protein ligase activity post-translational protein modification regulation of protein metabolic process                                                                                                                                                                                                     |
| GRMZM5G830839    | -111 | serine-type endopeptidase activity homoserine kinase activity ATP binding proteolysis threonine metabolic process identical protein binding negative regulation of catalytic activity                                                                                                                                         |
| GRMZM2G346701    | -55  | nucleic acid binding                                                                                                                                                                                                                                                                                                          |
| AC235546.1_FG001 | -139 | structural molecule activity cell adhesion actin cytoskeleton                                                                                                                                                                                                                                                                 |
| GRMZM2G093276    | -12  | zinc ion transmembrane transporter activity zinc ion transport membrane integral to membrane metal ion transport metal ion transmembrane transporter activity transmembrane transport                                                                                                                                         |
| GRMZM2G158188    | -68  | No Description                                                                                                                                                                                                                                                                                                                |
| GRMZM2G704448    | -85  | No Description                                                                                                                                                                                                                                                                                                                |
| GRMZM2G146331    | -19  | DNA binding DNA-directed RNA polymerase activity transcription                                                                                                                                                                                                                                                                |
| GRMZM2G146331    | -15  | DNA binding DNA-directed RNA polymerase activity transcription                                                                                                                                                                                                                                                                |
| GRMZM2G146331    | -11  | DNA binding DNA-directed RNA polymerase activity transcription                                                                                                                                                                                                                                                                |
| GRMZM2G354615    | -149 | No Description                                                                                                                                                                                                                                                                                                                |
| GRMZM2G040945    | -174 | serine-type peptidase activity integral to membrane                                                                                                                                                                                                                                                                           |
| GRMZM2G158636    | -9   | No Description                                                                                                                                                                                                                                                                                                                |
| GRMZM2G011463    | -157 | No Description                                                                                                                                                                                                                                                                                                                |
| GRMZM2G071869    | -8   | No Description                                                                                                                                                                                                                                                                                                                |
| GRMZM2G397260    | -10  | No Description                                                                                                                                                                                                                                                                                                                |
| GRMZM2G044822    | -29  | No Description                                                                                                                                                                                                                                                                                                                |
| GRMZM2G006416    | -60  | catalytic activity protein serine/threonine phosphatase activity protein amino acid dephosphorylation protein serine/threonine phosphatase complex                                                                                                                                                                            |
| GRMZM2G180027    | -38  | No Description                                                                                                                                                                                                                                                                                                                |
| GRMZM5G827186    | -62  | aspartic-type endopeptidase activity proteolysis integral to membrane                                                                                                                                                                                                                                                         |
| AC203986.3_FG013 | -110 | No Description                                                                                                                                                                                                                                                                                                                |

|                |      |                                                                                                                                                                                                                                                                                                                     |
|----------------|------|---------------------------------------------------------------------------------------------------------------------------------------------------------------------------------------------------------------------------------------------------------------------------------------------------------------------|
| GRMZM2G000718  | -11  | No Description                                                                                                                                                                                                                                                                                                      |
| GRMZM2G180205  | -131 | No Description                                                                                                                                                                                                                                                                                                      |
| GRMZM2G180693  | -79  | lipid transport lipid binding                                                                                                                                                                                                                                                                                       |
| GRMZM2G303536  | -183 | electron carrier activity protein disulfide oxidoreductase activity cell redox homeostasis                                                                                                                                                                                                                          |
| GRMZM2G401561  | -193 | nuclear mRNA splicing, via spliceosome intracellular nucleus RNA processing                                                                                                                                                                                                                                         |
| GRMZM2G074489  | -58  | catalytic activity                                                                                                                                                                                                                                                                                                  |
| GRMZM2G084496  | -32  | magnesium ion binding metabolic process lyase activity                                                                                                                                                                                                                                                              |
| GRMZM2G063363  | -73  | structural molecule activity                                                                                                                                                                                                                                                                                        |
| GRMZM2G016254  | -32  | magnesium ion binding metabolic process lyase activity                                                                                                                                                                                                                                                              |
| GRMZM2G310453  | -54  | No Description                                                                                                                                                                                                                                                                                                      |
| GRMZM2G155836  | -153 | protein kinase activity protein serine/threonine kinase activity ATP binding protein amino acid phosphorylation                                                                                                                                                                                                     |
| GRMZM2G5863097 | -60  | potassium ion transport metabolic process cation transmembrane transporter activity oxidoreductase activity, acting on the CH-OH group of donors, NAD or NADP as acceptor cofactor binding NAD or NADH binding                                                                                                      |
| GRMZM2G174773  | -60  | potassium ion transport metabolic process cation transmembrane transporter activity oxidoreductase activity, acting on the CH-OH group of donors, NAD or NADP as acceptor cofactor binding NAD or NADH binding                                                                                                      |
| GRMZM2G126586  | -111 | membrane                                                                                                                                                                                                                                                                                                            |
| GRMZM2G153456  | -15  | No Description                                                                                                                                                                                                                                                                                                      |
| GRMZM2G414229  | -51  | No Description                                                                                                                                                                                                                                                                                                      |
| GRMZM2G058573  | -79  | chromatin silencing protein amino acid deacetylation zinc ion binding hydrolase activity, acting on carbon-nitrogen (but not peptide) bonds, in linear amides regulation of transcription NAD binding                                                                                                               |
| GRMZM2G070111  | -146 | nucleosome DNA binding nucleosome assembly                                                                                                                                                                                                                                                                          |
| GRMZM2G164743  | -62  | transmembrane transport                                                                                                                                                                                                                                                                                             |
| GRMZM2G065176  | -122 | No Description                                                                                                                                                                                                                                                                                                      |
| GRMZM2G085236  | -131 | nucleotide binding signal transducer activity ATP binding transport G-protein coupled receptor protein signaling pathway integral to membrane ATPase activity nucleoside-triphosphatase activity guanyl nucleotide binding ATPase activity, coupled to transmembrane movement of substances transmembrane transport |
| GRMZM2G066469  | -60  | proteolysis serine-type peptidase activity membrane                                                                                                                                                                                                                                                                 |
| GRMZM2G011513  | -70  | No Description                                                                                                                                                                                                                                                                                                      |
| GRMZM2G011070  | -78  | protein kinase activity protein serine/threonine kinase activity ATP binding protein amino acid phosphorylation                                                                                                                                                                                                     |

**y Table S5 (Continued) - Motif 4**

| Gene ID          | Coordinate motif start | Annotation                                                                                                                                                                                                                                                             |
|------------------|------------------------|------------------------------------------------------------------------------------------------------------------------------------------------------------------------------------------------------------------------------------------------------------------------|
| GRMZM2G465046    | -180                   | lipid metabolic process hydrolase activity, acting on ester bonds                                                                                                                                                                                                      |
| GRMZM2G465046    | -176                   | lipid metabolic process hydrolase activity, acting on ester bonds                                                                                                                                                                                                      |
| GRMZM2G077696    | -75                    | No Description                                                                                                                                                                                                                                                         |
| GRMZM2G434839    | -101                   | protein folding heat shock protein binding unfolded protein binding                                                                                                                                                                                                    |
| GRMZM2G5869587   | -147                   | No Description                                                                                                                                                                                                                                                         |
| GRMZM2G5820788   | -146                   | No Description                                                                                                                                                                                                                                                         |
| GRMZM2G095441    | -6                     | SNAP receptor activity protein binding intracellular protein transport membrane vesicle-mediated transport                                                                                                                                                             |
| GRMZM2G035749    | -182                   | polysaccharide catabolic process structural constituent of ribosome intracellular ribosome translation beta-amylase activity                                                                                                                                           |
| GRMZM2G371030    | -108                   | No Description                                                                                                                                                                                                                                                         |
| GRMZM2G178278    | -79                    | vesicle-mediated transport                                                                                                                                                                                                                                             |
| GRMZM2G348039    | -197                   | No Description                                                                                                                                                                                                                                                         |
| GRMZM2G113057    | -172                   | No Description                                                                                                                                                                                                                                                         |
| GRMZM2G055899    | -57                    | catalytic activity branched-chain-amino-acid transaminase activity metabolic process branched chain family amino acid metabolic process                                                                                                                                |
| GRMZM2G472236    | -44                    | homeothermy ice binding response to freezing                                                                                                                                                                                                                           |
| GRMZM2G432566    | -25                    | protein binding intracellular zinc ion binding                                                                                                                                                                                                                         |
| GRMZM2G890241    | -93                    | protein binding                                                                                                                                                                                                                                                        |
| GRMZM2G153536    | -6                     | catalytic activity branched-chain-amino-acid transaminase activity metabolic process branched chain family amino acid metabolic process                                                                                                                                |
| AC196161.3 FG002 | -150                   | No Description                                                                                                                                                                                                                                                         |
| GRMZM2G142390    | -120                   | protein kinase activity protein serine/threonine kinase activity ATP binding protein amino acid phosphorylation                                                                                                                                                        |
| GRMZM2G142390    | -116                   | protein kinase activity protein serine/threonine kinase activity ATP binding protein amino acid phosphorylation                                                                                                                                                        |
| GRMZM2G143703    | -139                   | No Description                                                                                                                                                                                                                                                         |
| GRMZM2G058630    | -178                   | phosphatidylcholine-sterol O-acyltransferase activity lipid metabolic process                                                                                                                                                                                          |
| GRMZM2G315862    | -157                   | No Description                                                                                                                                                                                                                                                         |
| GRMZM2G459540    | -11                    | intracellular zinc ion binding                                                                                                                                                                                                                                         |
| GRMZM2G050273    | -67                    | No Description                                                                                                                                                                                                                                                         |
| GRMZM2G368827    | -178                   | membrane                                                                                                                                                                                                                                                               |
| AC20630.4 FG001  | -147                   | drug transmembrane transport drug transmembrane transporter activity antiporter activity membrane transmembrane transport                                                                                                                                              |
| GRMZM2G352381    | -67                    | No Description                                                                                                                                                                                                                                                         |
| GRMZM2G356718    | -169                   | DNA binding catalytic activity                                                                                                                                                                                                                                         |
| GRMZM2G176630    | -137                   | sugar binding protein amino acid glycosylation galactosyltransferase activity membrane homeothermy ice binding response to freezing                                                                                                                                    |
| GRMZM2G085303    | -19                    | No Description                                                                                                                                                                                                                                                         |
| GRMZM2G312061    | -20                    | cysteine-type endopeptidase inhibitor activity                                                                                                                                                                                                                         |
| GRMZM2G394783    | -121                   | monooxygenase activity iron ion binding electron carrier activity heme binding oxidation reduction                                                                                                                                                                     |
| AC191692.3 FG001 | -136                   | No Description                                                                                                                                                                                                                                                         |
| GRMZM2G115775    | -121                   | protein binding membrane vesicle-mediated transport                                                                                                                                                                                                                    |
| AC217947.4 FG002 | -100                   | iron ion binding FMN binding oxidoreductase activity oxidation reduction                                                                                                                                                                                               |
| GRMZM2G459746    | -7                     | nucleic acid binding                                                                                                                                                                                                                                                   |
| GRMZM2G146207    | -105                   | No Description                                                                                                                                                                                                                                                         |
| GRMZM2G129979    | -154                   | nucleus                                                                                                                                                                                                                                                                |
| GRMZM2G325575    | -47                    | cellular iron ion homeostasis ferric iron binding oxidoreductase activity transition metal ion binding oxidation reduction                                                                                                                                             |
| GRMZM2G109680    | -142                   | No Description                                                                                                                                                                                                                                                         |
| GRMZM2G163277    | -124                   | No Description                                                                                                                                                                                                                                                         |
| GRMZM2G071745    | -58                    | heme binding                                                                                                                                                                                                                                                           |
| GRMZM2G031996    | -87                    | No Description                                                                                                                                                                                                                                                         |
| GRMZM2G011383    | -183                   | No Description                                                                                                                                                                                                                                                         |
| GRMZM2G166719    | -195                   | protein kinase activity protein serine/threonine kinase activity ATP binding protein amino acid phosphorylation                                                                                                                                                        |
| GRMZM2G894340    | -197                   | No Description                                                                                                                                                                                                                                                         |
| GRMZM2G044348    | -20                    | aspartic-type endopeptidase activity integral to membrane                                                                                                                                                                                                              |
| GRMZM2G010403    | -95                    | RNA binding structural constituent of ribosome intracellular ribosome translation                                                                                                                                                                                      |
| GRMZM2G366434    | -191                   | DNA binding transcription factor activity regulation of transcription, DNA-dependent                                                                                                                                                                                   |
| GRMZM2G074604    | -170                   | catalytic activity cytoplasm L-phenylalanine catabolic process biosynthetic process ammonia-lyase activity                                                                                                                                                             |
| GRMZM2G075366    | -131                   | No Description                                                                                                                                                                                                                                                         |
| GRMZM2G038279    | -62                    | chromatin DNA binding nucleus regulation of transcription, DNA-dependent                                                                                                                                                                                               |
| GRMZM2G104920    | -193                   | ubiquitin ligase complex protein phosphatase type 2A complex ubiquitin-protein ligase activity protein binding signal transduction zinc ion binding protein phosphatase type 2A regulator activity protein ubiquitination homeothermy ice binding response to freezing |
| GRMZM2G5861978   | -163                   | structural constituent of ribosome intracellular ribosome translation                                                                                                                                                                                                  |



|                  |      |                                                                                                                                                                                                                                                                                      |
|------------------|------|--------------------------------------------------------------------------------------------------------------------------------------------------------------------------------------------------------------------------------------------------------------------------------------|
| GRMZM2G402797    | -65  | No Description                                                                                                                                                                                                                                                                       |
| AC197340.3_FG004 | -43  | No Description                                                                                                                                                                                                                                                                       |
| GRMZM2G422147    | -45  | No Description                                                                                                                                                                                                                                                                       |
| GRMZM2G106650    | -116 | monooxygenase activity iron ion binding electron carrier activity heme binding oxidation reduction                                                                                                                                                                                   |
| GRMZM2G176129    | -173 | oxidoreductase activity, acting on NADH or NADPH, quinone or similar compound as acceptor oxidation reduction                                                                                                                                                                        |
| GRMZM2G026095    | -27  | metabolic process zinc ion binding hydrolase activity                                                                                                                                                                                                                                |
| GRMZM2G004188    | -189 | DNA binding catalytic activity nuclease activity DNA repair                                                                                                                                                                                                                          |
| GRMZM2G163297    | -171 | nucleic acid binding RNA binding                                                                                                                                                                                                                                                     |
| GRMZM2G146292    | -170 | No Description                                                                                                                                                                                                                                                                       |
| AC202534.2_FG007 | -191 | No Description                                                                                                                                                                                                                                                                       |
| GRMZM2G106604    | -89  | No Description                                                                                                                                                                                                                                                                       |
| GRMZM2G021051    | -165 | iron ion binding oxidoreductase activity oxidation reduction                                                                                                                                                                                                                         |
| GRMZM2G398758    | -66  | DNA binding                                                                                                                                                                                                                                                                          |
| GRMZM2G152370    | -118 | No Description                                                                                                                                                                                                                                                                       |
| GRMZM2G021243    | -9   | No Description                                                                                                                                                                                                                                                                       |
| GRMZM2G428905    | -176 | No Description                                                                                                                                                                                                                                                                       |
| GRMZM2G336879    | -19  | ribonucleoside-diphosphate reductase activity ribonucleoside-diphosphate reductase complex DNA replication                                                                                                                                                                           |
| GRMZM2G074373    | -19  | DNA binding transcription factor activity nucleus transcription, DNA-dependent sequence-specific DNA binding regulation of transcription protein dimerization activity                                                                                                               |
| GRMZM2G005753    | -103 | protein folding heat shock protein binding unfolded protein binding                                                                                                                                                                                                                  |
| GRMZM2G016668    | -102 | protein binding zinc ion binding                                                                                                                                                                                                                                                     |
| GRMZM2G018022    | -99  | metabolic process nucleotidyltransferase activity                                                                                                                                                                                                                                    |
| GRMZM2G135095    | -103 | structural constituent of ribosome intracellular ribosome translation                                                                                                                                                                                                                |
| GRMZM2G125216    | -59  | No Description                                                                                                                                                                                                                                                                       |
| AC209810.3_FG002 | -22  | cysteine-type endopeptidase activity proteolysis cysteine-type peptidase activity                                                                                                                                                                                                    |
| GRMZM2G013016    | -107 | No Description                                                                                                                                                                                                                                                                       |
| GRMZM2G113319    | -176 | nucleotide binding motor activity ATP binding myosin complex nucleoside-triphosphatase activity                                                                                                                                                                                      |
| AC155377.1_FG001 | -131 | nucleotide binding motor activity ATP binding myosin complex nucleoside-triphosphatase activity                                                                                                                                                                                      |
| GRMZM2G094490    | -114 | nucleotide binding ATP-dependent peptidase activity serine-type endopeptidase activity ATP binding proteolysis membrane ATPase activity nucleoside-triphosphatase activity                                                                                                           |
| GRMZM2G552418    | -128 | No Description                                                                                                                                                                                                                                                                       |
| GRMZM2G100568    | -189 | No Description                                                                                                                                                                                                                                                                       |
| GRMZM2G005622    | -11  | No Description                                                                                                                                                                                                                                                                       |
| GRMZM2G027253    | -197 | DNA binding regulation of transcription, DNA-dependent                                                                                                                                                                                                                               |
| GRMZM2G147245    | -35  | monooxygenase activity iron ion binding electron carrier activity heme binding oxidation reduction                                                                                                                                                                                   |
| GRMZM2G063961    | -199 | protein kinase activity protein serine/threonine kinase activity ATP binding protein amino acid phosphorylation                                                                                                                                                                      |
| GRMZM2G082037    | -13  | metabolic process transferase activity, transferring hexose groups                                                                                                                                                                                                                   |
| GRMZM2G381709    | -32  | small conjugating protein ligase activity post-translational protein modification regulation of protein metabolic process                                                                                                                                                            |
| GRMZM2G036837    | -125 | nucleic acid binding zinc ion binding                                                                                                                                                                                                                                                |
| GRMZM2G024674    | -136 | No Description                                                                                                                                                                                                                                                                       |
| GRMZM2G109627    | -10  | DNA binding regulation of transcription                                                                                                                                                                                                                                              |
| AC211474.3_FG006 | -132 | No Description                                                                                                                                                                                                                                                                       |
| AC211474.3_FG006 | -78  | No Description                                                                                                                                                                                                                                                                       |
| GRMZM2G074824    | -78  | catalytic activity                                                                                                                                                                                                                                                                   |
| GRMZM2G099052    | -131 | No Description                                                                                                                                                                                                                                                                       |
| GRMZM2G168675    | -38  | No Description                                                                                                                                                                                                                                                                       |
| GRMZM2G347471    | -197 | No Description                                                                                                                                                                                                                                                                       |
| GRMZM2G047412    | -134 | No Description                                                                                                                                                                                                                                                                       |
| GRMZM2G028986    | -10  | heme binding                                                                                                                                                                                                                                                                         |
| GRMZM2G361066    | -24  | nucleotide binding ATP-dependent peptidase activity serine-type endopeptidase activity ATP binding proteolysis membrane ATPase activity nucleoside-triphosphatase activity                                                                                                           |
| GRMZM2G025031    | -172 | uroporphyrinogen decarboxylase activity porphyrin biosynthetic process                                                                                                                                                                                                               |
| GRMZM2G169584    | -24  | ATP binding apoptosis                                                                                                                                                                                                                                                                |
| GRMZM2G047214    | -112 | No Description                                                                                                                                                                                                                                                                       |
| GRMZM2G074462    | -199 | catalytic activity carbohydrate metabolic process carbohydrate binding                                                                                                                                                                                                               |
| GRMZM2G085934    | -119 | No Description                                                                                                                                                                                                                                                                       |
| GRMZM2G170420    | -181 | No Description                                                                                                                                                                                                                                                                       |
| GRMZM2G125448    | -195 | transferase activity, transferring acyl groups other than amino-acyl groups                                                                                                                                                                                                          |
| GRMZM2G041388    | -178 | No Description                                                                                                                                                                                                                                                                       |
| GRMZM2G325008    | -122 | hydrolase activity, hydrolyzing O-glycosyl compounds carbohydrate metabolic process cellular process                                                                                                                                                                                 |
| GRMZM2G083555    | -195 | No Description                                                                                                                                                                                                                                                                       |
| GRMZM2G027851    | -173 | voltage-gated potassium channel activity cation transport potassium ion transport sodium ion transport regulation of pH voltage-gated potassium channel complex solute:hydrogen antiporter activity sodium:hydrogen antiporter activity integral to membrane transmembrane transport |
| GRMZM5G838435    | -45  | catalytic activity                                                                                                                                                                                                                                                                   |
| GRMZM2G115579    | -51  | No Description                                                                                                                                                                                                                                                                       |
| AC203972.3_FG001 | -59  | structural constituent of ribosome ATP binding intracellular ribosome translation apoptosis defense response                                                                                                                                                                         |
| GRMZM2G088140    | -51  | DNA binding transcription factor activity nucleus transcription, DNA-dependent regulation of transcription, DNA-dependent sequence-specific DNA binding regulation of transcription protein dimerization activity                                                                    |
| GRMZM2G405170    | -198 | DNA binding regulation of transcription, DNA-dependent                                                                                                                                                                                                                               |
| GRMZM2G043749    | -160 | No Description                                                                                                                                                                                                                                                                       |
| GRMZM2G314593    | -99  | No Description                                                                                                                                                                                                                                                                       |
| GRMZM2G110145    | -163 | membrane cellulose synthase (UDP-forming) activity cellulose biosynthetic process                                                                                                                                                                                                    |
| GRMZM2G021277    | -123 | cellular amino acid and derivative metabolic process carboxy-lyase activity carboxylic acid metabolic process pyridoxal phosphate binding                                                                                                                                            |
| GRMZM2G062541    | -88  | nucleus transcription regulator activity regulation of transcription                                                                                                                                                                                                                 |
| GRMZM2G062541    | -84  | nucleus transcription regulator activity regulation of transcription                                                                                                                                                                                                                 |
| GRMZM2G415579    | -103 | oxidoreductase activity oxidation reduction                                                                                                                                                                                                                                          |
| GRMZM2G027241    | -138 | No Description                                                                                                                                                                                                                                                                       |
| GRMZM2G107299    | -22  | No Description                                                                                                                                                                                                                                                                       |
| GRMZM2G070279    | -60  | alcohol dehydrogenase (NAD) activity metabolic process 2,3-dihydro-2,3-dihydroxybenzoate dehydrogenase activity enterobactin biosynthetic process oxidoreductase activity oxidation reduction                                                                                        |
| GRMZM2G018631    | -34  | protein binding zinc ion binding                                                                                                                                                                                                                                                     |
| GRMZM5G81174     | -138 | No Description                                                                                                                                                                                                                                                                       |
| GRMZM2G352381    | -67  | No Description                                                                                                                                                                                                                                                                       |
| GRMZM2G161368    | -188 | No Description                                                                                                                                                                                                                                                                       |
| GRMZM2G169207    | -173 | No Description                                                                                                                                                                                                                                                                       |
| GRMZM5G836606    | -5   | No Description                                                                                                                                                                                                                                                                       |
| GRMZM2G003307    | -58  | No Description                                                                                                                                                                                                                                                                       |
| GRMZM2G064773    | -90  | protein serine/threonine kinase activity ATP binding protein amino acid phosphorylation                                                                                                                                                                                              |
| GRMZM2G053631    | -11  | nucleic acid binding intracellular nucleobase, nucleoside, nucleotide and nucleic acid metabolic process 3'-5' exonuclease activity                                                                                                                                                  |
| GRMZM2G398758    | -66  | DNA binding                                                                                                                                                                                                                                                                          |
| GRMZM5G899656    | -86  | catalytic activity phosphoribosylamine-glycine ligase activity ATP binding purine base biosynthetic process                                                                                                                                                                          |

|                  |      |                                                                                                                                                                                                                                                          |
|------------------|------|----------------------------------------------------------------------------------------------------------------------------------------------------------------------------------------------------------------------------------------------------------|
| GRMZM2G413044    | -16  | hydrolase activity, hydrolyzing O-glycosyl compounds cell wall carbohydrate metabolic process cellular glucan metabolic process xyloquocan:xyloquocanyl transferase activity apoplast                                                                    |
| GRMZM2G082198    | -43  | nucleic acid binding                                                                                                                                                                                                                                     |
| GRMZM2G062318    | -99  | No Description                                                                                                                                                                                                                                           |
| GRMZM2G402156    | -48  | DNA binding                                                                                                                                                                                                                                              |
| AC197699.3 FG008 | -21  | No Description                                                                                                                                                                                                                                           |
| GRMZM2G448656    | -32  | No Description                                                                                                                                                                                                                                           |
| GRMZM2G083716    | -100 | protein binding ATP binding cytoplasm protein folding protein refolding cellular protein metabolic process                                                                                                                                               |
| AC187789.3 FG001 | -46  | No Description                                                                                                                                                                                                                                           |
| GRMZM2G455687    | -158 | No Description                                                                                                                                                                                                                                           |
| GRMZM2G138370    | -179 | No Description                                                                                                                                                                                                                                           |
| GRMZM2G134049    | -114 | No Description                                                                                                                                                                                                                                           |
| GRMZM2G047867    | -55  | catalytic activity                                                                                                                                                                                                                                       |
| GRMZM2G081474    | -22  | histone deacetylase activity histone deacetylation acetoin metabolic process                                                                                                                                                                             |
| GRMZM2G305238    | -51  | No Description                                                                                                                                                                                                                                           |
| GRMZM2G029690    | -186 | protein binding zinc ion binding                                                                                                                                                                                                                         |
| GRMZM2G028254    | -19  | No Description                                                                                                                                                                                                                                           |
| GRMZM2G451746    | -99  | No Description                                                                                                                                                                                                                                           |
| GRMZM2G116452    | -176 | peroxidase activity response to oxidative stress heme binding oxidation reduction                                                                                                                                                                        |
| GRMZM2G704352    | -113 | No Description                                                                                                                                                                                                                                           |
| GRMZM2G121360    | -179 | metal ion transport metal ion binding                                                                                                                                                                                                                    |
| GRMZM5G828123    | -18  | No Description                                                                                                                                                                                                                                           |
| GRMZM5G828987    | -59  | hydrolase activity, hydrolyzing O-glycosyl compounds carbohydrate metabolic process                                                                                                                                                                      |
| GRMZM2G126821    | -155 | structural constituent of ribosome intracellular ribosome translation small ribosomal subunit                                                                                                                                                            |
| GRMZM2G358931    | -174 | structural constituent of ribosome cyclin-dependent protein kinase inhibitor activity histamine receptor activity intracellular nucleus ribosome translation cell cycle arrest G-protein coupled receptor protein signaling pathway integral to membrane |
| GRMZM5G809743    | -135 | No Description                                                                                                                                                                                                                                           |
| GRMZM2G022907    | -18  | No Description                                                                                                                                                                                                                                           |
| GRMZM2G139852    | -93  | No Description                                                                                                                                                                                                                                           |
| GRMZM2G153536    | -8   | catalytic activity branched-chain-amino-acid transaminase activity metabolic process branched chain family amino acid metabolic process                                                                                                                  |
| GRMZM2G085427    | -131 | DNA binding                                                                                                                                                                                                                                              |
| AC231441.1 FG004 | -152 | No Description                                                                                                                                                                                                                                           |
| GRMZM2G161337    | -105 | tryptophan biosynthetic process anthranilate synthase activity biosynthetic process oxo-acyl-lyase activity                                                                                                                                              |
| GRMZM2G345330    | -164 | No Description                                                                                                                                                                                                                                           |
| GRMZM2G174284    | -66  | transcription factor activity regulation of transcription, DNA-dependent sequence-specific DNA binding                                                                                                                                                   |
| GRMZM2G013299    | -16  | glutathione peroxidase activity response to oxidative stress oxidation reduction                                                                                                                                                                         |
| GRMZM2G552278    | -164 | No Description                                                                                                                                                                                                                                           |
| GRMZM5G838488    | -17  | No Description                                                                                                                                                                                                                                           |
| GRMZM2G030636    | -192 | No Description                                                                                                                                                                                                                                           |
| GRMZM2G089291    | -78  | iron ion binding sodium ion transport regulation of pH electron carrier activity sodium:hydrogen antiporter activity membrane integral to membrane oxidoreductase activity FAD binding oxidation reduction                                               |
| GRMZM2G001895    | -120 | binding heat shock protein binding                                                                                                                                                                                                                       |
| GRMZM5G841743    | -48  | No Description                                                                                                                                                                                                                                           |
| GRMZM2G030436    | -136 | transferase activity, transferring acyl groups other than amino-acyl groups                                                                                                                                                                              |
| GRMZM2G123418    | -20  | No Description                                                                                                                                                                                                                                           |
| GRMZM2G034680    | -59  | No Description                                                                                                                                                                                                                                           |
| GRMZM2G303010    | -190 | No Description                                                                                                                                                                                                                                           |
| GRMZM2G119339    | -22  | No Description                                                                                                                                                                                                                                           |
| GRMZM2G008250    | -116 | No Description                                                                                                                                                                                                                                           |
| GRMZM2G042313    | -44  | structural constituent of ribosome intracellular ribosome translation transport amino acid transport amino acid transmembrane transporter activity membrane transmembrane transport                                                                      |
| GRMZM2G093809    | -60  | protein kinase activity protein serine/threonine kinase activity protein binding ATP binding protein amino acid phosphorylation                                                                                                                          |
| GRMZM2G009117    | -190 | metal ion transport metal ion binding                                                                                                                                                                                                                    |
| GRMZM2G472671    | -90  | nucleus type I hypersensitivity transcription regulator activity regulation of transcription                                                                                                                                                             |
| GRMZM2G340305    | -56  | DNA binding regulation of transcription                                                                                                                                                                                                                  |
| GRMZM2G016439    | -106 | two-component signal transduction system (phosphorelay) signal transducer activity                                                                                                                                                                       |
| GRMZM2G449163    | -112 | protein tyrosine phosphatase activity dephosphorylation phosphatase activity                                                                                                                                                                             |
| GRMZM2G160560    | -21  | membrane                                                                                                                                                                                                                                                 |
| GRMZM2G564469    | -174 | No Description                                                                                                                                                                                                                                           |
| GRMZM2G101105    | -41  | RNA binding double-stranded RNA binding ribonuclease III activity intracellular RNA processing                                                                                                                                                           |
| GRMZM2G703910    | -101 | No Description                                                                                                                                                                                                                                           |
| GRMZM2G067626    | -18  | No Description                                                                                                                                                                                                                                           |
| GRMZM2G131591    | -187 | protein binding zinc ion binding                                                                                                                                                                                                                         |
| GRMZM2G135866    | -189 | protein binding zinc ion binding                                                                                                                                                                                                                         |
| GRMZM2G459291    | -22  | catalytic activity                                                                                                                                                                                                                                       |
| GRMZM5G830585    | -77  | No Description                                                                                                                                                                                                                                           |
| GRMZM2G145412    | -112 | No Description                                                                                                                                                                                                                                           |
| GRMZM2G163761    | -19  | transcription factor activity catalytic activity nucleus regulation of transcription, DNA-dependent transcription regulator activity sequence-specific DNA binding cellular metabolic process                                                            |
| GRMZM2G036505    | -151 | No Description                                                                                                                                                                                                                                           |
| GRMZM2G416426    | -134 | No Description                                                                                                                                                                                                                                           |
| GRMZM2G174083    | -115 | motor activity ATP binding myosin complex                                                                                                                                                                                                                |
| GRMZM2G053023    | -176 | cell redox homeostasis                                                                                                                                                                                                                                   |
| GRMZM2G022662    | -147 | translation elongation factor activity translational elongation                                                                                                                                                                                          |
| GRMZM2G104125    | -10  | protein kinase activity protein serine/threonine kinase activity calcium ion binding ATP binding protein amino acid phosphorylation                                                                                                                      |
| GRMZM2G347056    | -54  | methylenetetrahydrofolate reductase (NADPH) activity methionine metabolic process oxidation reduction                                                                                                                                                    |
| GRMZM2G016084    | -163 | RNA binding                                                                                                                                                                                                                                              |
| GRMZM2G023557    | -66  | DNA binding                                                                                                                                                                                                                                              |
| GRMZM2G339848    | -151 | transcription factor activity regulation of transcription, DNA-dependent sequence-specific DNA binding                                                                                                                                                   |
| GRMZM2G140527    | -121 | copper ion binding oxidoreductase activity oxidation reduction                                                                                                                                                                                           |
| GRMZM2G122498    | -180 | monooxygenase activity iron ion binding electron carrier activity heme binding oxidation reduction                                                                                                                                                       |
| AC218998.2 FG001 | -160 | monooxygenase activity iron ion binding electron carrier activity heme binding oxidation reduction                                                                                                                                                       |
| GRMZM2G434299    | -51  | No Description                                                                                                                                                                                                                                           |
| GRMZM2G011896    | -21  | protein kinase activity protein serine/threonine kinase activity protein binding ATP binding protein amino acid phosphorylation                                                                                                                          |
| GRMZM2G074293    | -28  | No Description                                                                                                                                                                                                                                           |
| GRMZM2G171420    | -73  | No Description                                                                                                                                                                                                                                           |
| AC209029.2 FG002 | -173 | No Description                                                                                                                                                                                                                                           |
| GRMZM2G702379    | -148 | No Description                                                                                                                                                                                                                                           |
| GRMZM2G170829    | -98  | manganese ion binding nutrient reservoir activity apoplast                                                                                                                                                                                               |
| AC196475.3 FG004 | -175 | methyltransferase activity O-methyltransferase activity protein dimerization activity                                                                                                                                                                    |
| GRMZM2G055520    | -99  | No Description                                                                                                                                                                                                                                           |

|                  |      |                                                                                                                                                                                                                                                                                                                                                                                                                                                                                                                                                                                                                          |
|------------------|------|--------------------------------------------------------------------------------------------------------------------------------------------------------------------------------------------------------------------------------------------------------------------------------------------------------------------------------------------------------------------------------------------------------------------------------------------------------------------------------------------------------------------------------------------------------------------------------------------------------------------------|
| GRMZM2G354618    | -182 | nucleus transcription regulator activity regulation of transcription                                                                                                                                                                                                                                                                                                                                                                                                                                                                                                                                                     |
| GRMZM2G702419    | -190 | No Description                                                                                                                                                                                                                                                                                                                                                                                                                                                                                                                                                                                                           |
| GRMZM2G036217    | -8   | No Description                                                                                                                                                                                                                                                                                                                                                                                                                                                                                                                                                                                                           |
| GRMZM2G425999    | -181 | potassium ion transport potassium ion transmembrane transporter activity membrane                                                                                                                                                                                                                                                                                                                                                                                                                                                                                                                                        |
| AC205664.3 FG001 | -78  | No Description                                                                                                                                                                                                                                                                                                                                                                                                                                                                                                                                                                                                           |
| AC191892.3 FG001 | -138 | No Description                                                                                                                                                                                                                                                                                                                                                                                                                                                                                                                                                                                                           |
| GRMZM2G013214    | -131 | metabolic process oxidoreductase activity homoiothermy ice binding response to freezing oxidation reduction                                                                                                                                                                                                                                                                                                                                                                                                                                                                                                              |
| GRMZM2G168171    | -124 | No Description                                                                                                                                                                                                                                                                                                                                                                                                                                                                                                                                                                                                           |
| AC205269.3 FG003 | -19  | No Description                                                                                                                                                                                                                                                                                                                                                                                                                                                                                                                                                                                                           |
| GRMZM2G394945    | -49  | No Description                                                                                                                                                                                                                                                                                                                                                                                                                                                                                                                                                                                                           |
| GRMZM2G122979    | -138 | No Description                                                                                                                                                                                                                                                                                                                                                                                                                                                                                                                                                                                                           |
| GRMZM2G135132    | -198 | 6-phosphofructokinase activity adenosine kinase activity ribokinase activity 6-phosphofructokinase complex D-ribose metabolic process glycolysis purine ribonucleoside salvage                                                                                                                                                                                                                                                                                                                                                                                                                                           |
| GRMZM2G129675    | -66  | No Description                                                                                                                                                                                                                                                                                                                                                                                                                                                                                                                                                                                                           |
| GRMZM2G147780    | -70  | Rho quanyl-nucleotide exchange factor activity                                                                                                                                                                                                                                                                                                                                                                                                                                                                                                                                                                           |
| GRMZM2G076631    | -46  | catalytic activity                                                                                                                                                                                                                                                                                                                                                                                                                                                                                                                                                                                                       |
| GRMZM2G063276    | -9   | hydrolase activity                                                                                                                                                                                                                                                                                                                                                                                                                                                                                                                                                                                                       |
| GRMZM2G081843    | -163 | transporter activity transport membrane integral to membrane transmembrane transport                                                                                                                                                                                                                                                                                                                                                                                                                                                                                                                                     |
| GRMZM2G108147    | -174 | catalytic activity                                                                                                                                                                                                                                                                                                                                                                                                                                                                                                                                                                                                       |
| GRMZM2G008819    | -158 | copper ion binding electron carrier activity                                                                                                                                                                                                                                                                                                                                                                                                                                                                                                                                                                             |
| GRMZM2G138949    | -61  | No Description                                                                                                                                                                                                                                                                                                                                                                                                                                                                                                                                                                                                           |
| GRMZM2G038479    | -24  | nucleus transcription regulator activity regulation of transcription                                                                                                                                                                                                                                                                                                                                                                                                                                                                                                                                                     |
| GRMZM2G406552    | -116 | No Description                                                                                                                                                                                                                                                                                                                                                                                                                                                                                                                                                                                                           |
| GRMZM2G131957    | -21  | nucleic acid binding structural constituent of cell wall                                                                                                                                                                                                                                                                                                                                                                                                                                                                                                                                                                 |
| GRMZM2G332505    | -198 | nucleosome DNA binding nucleus nucleosome assembly amino acid transport membrane                                                                                                                                                                                                                                                                                                                                                                                                                                                                                                                                         |
| GRMZM2G051541    | -55  | No Description                                                                                                                                                                                                                                                                                                                                                                                                                                                                                                                                                                                                           |
| GRMZM2G049839    | -138 | aspartic-type endopeptidase activity proteolysis                                                                                                                                                                                                                                                                                                                                                                                                                                                                                                                                                                         |
| GRMZM2G336761    | -30  | protein binding zinc ion binding                                                                                                                                                                                                                                                                                                                                                                                                                                                                                                                                                                                         |
| GRMZM2G143445    | -159 | No Description                                                                                                                                                                                                                                                                                                                                                                                                                                                                                                                                                                                                           |
| GRMZM2G011052    | -108 | DNA binding catalytic activity DNA topoisomerase (ATP-hydrolyzing) activity copper-exporting ATPase activity copper ion binding ATP binding chromosome DNA topological change ATP biosynthetic process copper ion transport metabolic process mercury ion transmembrane transporter activity ATPase activity, coupled to transmembrane movement of ions, phosphorylative mechanism mercury ion transport membrane integral to membrane hydrolase activity, acting on acid anhydrides, catalyzing transmembrane movement of substances metal ion transport metal ion binding metal ion transmembrane transporter activity |
| GRMZM2G088258    | -11  | oxidoreductase activity                                                                                                                                                                                                                                                                                                                                                                                                                                                                                                                                                                                                  |
| GRMZM2G168888    | -195 | thiosulfate sulfurtransferase activity sulfate transport                                                                                                                                                                                                                                                                                                                                                                                                                                                                                                                                                                 |
| GRMZM2G119640    | -8   | nucleic acid binding zinc ion binding                                                                                                                                                                                                                                                                                                                                                                                                                                                                                                                                                                                    |
| GRMZM2G0862317   | -196 | lipid metabolic process hydrolase activity, acting on ester bonds                                                                                                                                                                                                                                                                                                                                                                                                                                                                                                                                                        |
| AC190636.3 FG005 | -116 | oxidoreductase activity                                                                                                                                                                                                                                                                                                                                                                                                                                                                                                                                                                                                  |
| GRMZM2G133481    | -56  | catalytic activity                                                                                                                                                                                                                                                                                                                                                                                                                                                                                                                                                                                                       |
| GRMZM2G002765    | -164 | catalytic activity                                                                                                                                                                                                                                                                                                                                                                                                                                                                                                                                                                                                       |
| GRMZM2G002765    | -161 | catalytic activity                                                                                                                                                                                                                                                                                                                                                                                                                                                                                                                                                                                                       |
| GRMZM2G110881    | -119 | catalytic activity 3-beta-hydroxy-delta5-steroid dehydrogenase activity steroid biosynthetic process metabolic process oxidoreductase activity cellular metabolic process coenzyme binding                                                                                                                                                                                                                                                                                                                                                                                                                               |
| GRMZM2G0810054   | -55  | No Description                                                                                                                                                                                                                                                                                                                                                                                                                                                                                                                                                                                                           |
| GRMZM2G701300    | -41  | No Description                                                                                                                                                                                                                                                                                                                                                                                                                                                                                                                                                                                                           |
| GRMZM2G171953    | -103 | No Description                                                                                                                                                                                                                                                                                                                                                                                                                                                                                                                                                                                                           |
| GRMZM2G077295    | -28  | protein binding intracellular protein transport ER to Golgi vesicle-mediated transport zinc ion binding COPII vesicle coat                                                                                                                                                                                                                                                                                                                                                                                                                                                                                               |
| GRMZM2G019958    | -196 | No Description                                                                                                                                                                                                                                                                                                                                                                                                                                                                                                                                                                                                           |
| GRMZM2G160664    | -20  | DNA binding ATP binding nucleus DNA replication DNA-dependent DNA replication initiation                                                                                                                                                                                                                                                                                                                                                                                                                                                                                                                                 |
| GRMZM2G102601    | -131 | two-component sensor activity ATP binding signal transduction membrane phosphorylation transferase activity, transferring phosphorus-containing groups                                                                                                                                                                                                                                                                                                                                                                                                                                                                   |
| AC194402.2 FG004 | -110 | No Description                                                                                                                                                                                                                                                                                                                                                                                                                                                                                                                                                                                                           |
| GRMZM2G018943    | -166 | cellular metabolic process                                                                                                                                                                                                                                                                                                                                                                                                                                                                                                                                                                                               |
| GRMZM2G388576    | -116 | No Description                                                                                                                                                                                                                                                                                                                                                                                                                                                                                                                                                                                                           |
| GRMZM2G403218    | -17  | No Description                                                                                                                                                                                                                                                                                                                                                                                                                                                                                                                                                                                                           |
| GRMZM2G162544    | -16  | SNAP receptor activity protein binding intracellular protein transport membrane vesicle-mediated transport                                                                                                                                                                                                                                                                                                                                                                                                                                                                                                               |
| GRMZM2G462081    | -14  | No Description                                                                                                                                                                                                                                                                                                                                                                                                                                                                                                                                                                                                           |
| GRMZM2G701448    | -177 | DNA binding DNA topoisomerase (ATP-hydrolyzing) activity ATP binding chromosome DNA topological change                                                                                                                                                                                                                                                                                                                                                                                                                                                                                                                   |
| GRMZM2G123097    | -186 | No Description                                                                                                                                                                                                                                                                                                                                                                                                                                                                                                                                                                                                           |
| GRMZM2G054745    | -191 | structural molecule activity viral capsid heat shock protein binding                                                                                                                                                                                                                                                                                                                                                                                                                                                                                                                                                     |
| GRMZM2G102447    | -37  | No Description                                                                                                                                                                                                                                                                                                                                                                                                                                                                                                                                                                                                           |
| AC185261.4 FG002 | -12  | No Description                                                                                                                                                                                                                                                                                                                                                                                                                                                                                                                                                                                                           |
| GRMZM2G109070    | -154 | No Description                                                                                                                                                                                                                                                                                                                                                                                                                                                                                                                                                                                                           |
| GRMZM2G023798    | -19  | catalytic activity intramolecular transferase activity                                                                                                                                                                                                                                                                                                                                                                                                                                                                                                                                                                   |
| GRMZM2G041878    | -127 | No Description                                                                                                                                                                                                                                                                                                                                                                                                                                                                                                                                                                                                           |
| GRMZM2G105331    | -176 | No Description                                                                                                                                                                                                                                                                                                                                                                                                                                                                                                                                                                                                           |
| GRMZM2G138423    | -53  | transporter activity binding mitochondrial inner membrane transport membrane transmembrane transport                                                                                                                                                                                                                                                                                                                                                                                                                                                                                                                     |
| GRMZM2G039089    | -15  | protein folding heat shock protein binding unfolded protein binding                                                                                                                                                                                                                                                                                                                                                                                                                                                                                                                                                      |
| GRMZM2G101523    | -43  | zinc ion binding                                                                                                                                                                                                                                                                                                                                                                                                                                                                                                                                                                                                         |
| GRMZM2G079682    | -100 | beta-1,4-mannosylglycoprotein 4-beta-N-acetylglucosaminyltransferase activity protein amino acid N-linked glycosylation membrane                                                                                                                                                                                                                                                                                                                                                                                                                                                                                         |
| GRMZM2G128902    | -190 | No Description                                                                                                                                                                                                                                                                                                                                                                                                                                                                                                                                                                                                           |
| GRMZM2G0859330   | -33  | No Description                                                                                                                                                                                                                                                                                                                                                                                                                                                                                                                                                                                                           |
| GRMZM2G463711    | -90  | No Description                                                                                                                                                                                                                                                                                                                                                                                                                                                                                                                                                                                                           |
| GRMZM2G702126    | -41  | No Description                                                                                                                                                                                                                                                                                                                                                                                                                                                                                                                                                                                                           |
| GRMZM2G056762    | -40  | No Description                                                                                                                                                                                                                                                                                                                                                                                                                                                                                                                                                                                                           |
| GRMZM2G090419    | -25  | hydrolase activity                                                                                                                                                                                                                                                                                                                                                                                                                                                                                                                                                                                                       |
| GRMZM2G130548    | -99  | No Description                                                                                                                                                                                                                                                                                                                                                                                                                                                                                                                                                                                                           |
| GRMZM2G072300    | -76  | heat shock protein binding                                                                                                                                                                                                                                                                                                                                                                                                                                                                                                                                                                                               |
| GRMZM2G086027    | -41  | No Description                                                                                                                                                                                                                                                                                                                                                                                                                                                                                                                                                                                                           |
| GRMZM2G119769    | -57  | homoiothermy ice binding response to freezing                                                                                                                                                                                                                                                                                                                                                                                                                                                                                                                                                                            |
| GRMZM2G465769    | -150 | No Description                                                                                                                                                                                                                                                                                                                                                                                                                                                                                                                                                                                                           |
| GRMZM2G017869    | -80  | lipid metabolic process hydrolase activity, acting on ester bonds                                                                                                                                                                                                                                                                                                                                                                                                                                                                                                                                                        |
| GRMZM2G385818    | -163 | chromatin DNA binding RNA binding structural constituent of ribosome nucleus regulation of transcription, DNA-dependent translation                                                                                                                                                                                                                                                                                                                                                                                                                                                                                      |
| GRMZM2G076212    | -22  | protein kinase activity protein serine/threonine kinase activity ATP binding protein amino acid phosphorylation                                                                                                                                                                                                                                                                                                                                                                                                                                                                                                          |
| GRMZM2G081886    | -182 | phosphoglycerate dehydrogenase activity L-serine biosynthetic process potassium ion transport metabolic process cation transmembrane transporter activity amino acid binding oxidoreductase activity, acting on the CH-OH group of donors, NAD or NADP as acceptor cofactor binding NAD or NADH binding oxidation reduction                                                                                                                                                                                                                                                                                              |
| GRMZM2G055844    | -194 | protein kinase activity protein serine/threonine kinase activity protein binding ATP binding protein amino acid phosphorylation                                                                                                                                                                                                                                                                                                                                                                                                                                                                                          |
| GRMZM2G106010    | -99  | No Description                                                                                                                                                                                                                                                                                                                                                                                                                                                                                                                                                                                                           |
| GRMZM2G0825909   | -68  | No Description                                                                                                                                                                                                                                                                                                                                                                                                                                                                                                                                                                                                           |
| GRMZM2G039711    | -20  | No Description                                                                                                                                                                                                                                                                                                                                                                                                                                                                                                                                                                                                           |

|                  |      |                                                                                                                                                                                                                                                                           |
|------------------|------|---------------------------------------------------------------------------------------------------------------------------------------------------------------------------------------------------------------------------------------------------------------------------|
| GRMZM2G178709    | -64  | No Description                                                                                                                                                                                                                                                            |
| GRMZM2G147268    | -171 | cellular amino acid metabolic process biosynthetic process transferase activity, transferring nitrogenous groups lyase activity pyridoxal phosphate binding                                                                                                               |
| GRMZM2G457697    | -52  | No Description                                                                                                                                                                                                                                                            |
| GRMZM2G138770    | -104 | nucleotide binding ATP binding nucleoside-triphosphatase activity                                                                                                                                                                                                         |
| GRMZM2G441748    | -118 | No Description                                                                                                                                                                                                                                                            |
| GRMZM2G050925    | -19  | No Description                                                                                                                                                                                                                                                            |
| GRMZM2G147685    | -56  | nucleus transcription regulator activity regulation of transcription                                                                                                                                                                                                      |
| GRMZM2G025042    | -66  | No Description                                                                                                                                                                                                                                                            |
| GRMZM2G509030    | -154 | No Description                                                                                                                                                                                                                                                            |
| GRMZM2G013357    | -99  | monooxygenase activity iron ion binding electron carrier activity heme binding oxidation reduction                                                                                                                                                                        |
| GRMZM2G178199    | -32  | No Description                                                                                                                                                                                                                                                            |
| GRMZM2G703185    | -70  | No Description                                                                                                                                                                                                                                                            |
| GRMZM2G145666    | -49  | structural constituent of cell wall                                                                                                                                                                                                                                       |
| GRMZM2G703193    | -31  | No Description                                                                                                                                                                                                                                                            |
| GRMZM2G180691    | -188 | hydrolase activity                                                                                                                                                                                                                                                        |
| GRMZM2G503606    | -138 | No Description                                                                                                                                                                                                                                                            |
| GRMZM2G066638    | -115 | motor activity ATP binding myosin complex                                                                                                                                                                                                                                 |
| GRMZM2G067756    | -39  | No Description                                                                                                                                                                                                                                                            |
| GRMZM2G146685    | -113 | No Description                                                                                                                                                                                                                                                            |
| GRMZM2G037574    | -8   | intracellular zinc ion binding                                                                                                                                                                                                                                            |
| GRMZM2G002053    | -27  | type I hypersensitivity homoiothermy lice binding response to freezing                                                                                                                                                                                                    |
| GRMZM2G015409    | -87  | protein binding zinc ion binding                                                                                                                                                                                                                                          |
| GRMZM2G379563    | -118 | No Description                                                                                                                                                                                                                                                            |
| GRMZM2G158629    | -163 | cysteine-type endopeptidase activity fatty acid synthase activity fatty acid synthase complex proteolysis fatty acid biosynthetic process metabolic process oxidoreductase activity oxidation reduction                                                                   |
| GRMZM2G703338    | -142 | No Description                                                                                                                                                                                                                                                            |
| GRMZM2G016106    | -12  | nucleic acid binding                                                                                                                                                                                                                                                      |
| AC219035.2 FG006 | -136 | No Description                                                                                                                                                                                                                                                            |
| GRMZM2G128771    | -29  | GTPase activity protein binding GTP binding intracellular intracellular protein transport nucleocytoplasmic transport signal transduction small GTPase mediated signal transduction protein transport                                                                     |
| GRMZM2G350773    | -12  | No Description                                                                                                                                                                                                                                                            |
| GRMZM2G103881    | -131 | No Description                                                                                                                                                                                                                                                            |
| GRMZM2G062019    | -134 | metabolic process hydrolase activity                                                                                                                                                                                                                                      |
| GRMZM2G062019    | -128 | metabolic process hydrolase activity                                                                                                                                                                                                                                      |
| GRMZM2G062019    | -122 | metabolic process hydrolase activity                                                                                                                                                                                                                                      |
| GRMZM2G062019    | -116 | metabolic process hydrolase activity                                                                                                                                                                                                                                      |
| GRMZM2G056329    | -82  | ATP binding                                                                                                                                                                                                                                                               |
| GRMZM2G027653    | -137 | nucleic acid binding RNA binding nucleus mRNA processing                                                                                                                                                                                                                  |
| GRMZM2G001388    | -63  | protein binding                                                                                                                                                                                                                                                           |
| GRMZM2G398758    | -68  | DNA binding                                                                                                                                                                                                                                                               |
| GRMZM2G345270    | -11  | sugar:hydrogen symporter activity transport phosphoenolpyruvate-dependent sugar phosphotransferase system                                                                                                                                                                 |
| GRMZM2G035482    | -61  | No Description                                                                                                                                                                                                                                                            |
| GRMZM2G308910    | -11  | DNA binding structural constituent of ribosome ligand-dependent nuclear receptor activity intracellular nucleus ribosome regulation of transcription, DNA-dependent translation                                                                                           |
| GRMZM2G390236    | -180 | No Description                                                                                                                                                                                                                                                            |
| GRMZM2G336879    | -21  | ribonucleoside-diphosphate reductase activity ribonucleoside-diphosphate reductase complex DNA replication                                                                                                                                                                |
| GRMZM2G336929    | -12  | transferase activity, transferring glycosyl groups                                                                                                                                                                                                                        |
| GRMZM2G013471    | -30  | No Description                                                                                                                                                                                                                                                            |
| GRMZM2G170307    | -31  | heat shock protein binding                                                                                                                                                                                                                                                |
| AC20904.3 FG003  | -42  | No Description                                                                                                                                                                                                                                                            |
| GRMZM2G013971    | -135 | ubiquitin ligase complex ubiquitin-protein ligase activity protein binding zinc ion binding protein ubiquitination                                                                                                                                                        |
| GRMZM2G046924    | -40  | transferase activity                                                                                                                                                                                                                                                      |
| GRMZM2G010384    | -151 | No Description                                                                                                                                                                                                                                                            |
| GRMZM2G081912    | -151 | ubiquitin ligase complex ubiquitin-protein ligase activity protein binding zinc ion binding protein ubiquitination                                                                                                                                                        |
| GRMZM2G701533    | -191 | No Description                                                                                                                                                                                                                                                            |
| GRMZM2G038356    | -71  | GTP binding intracellular intracellular protein transport small GTPase mediated signal transduction                                                                                                                                                                       |
| AC205833.3 FG002 | -52  | No Description                                                                                                                                                                                                                                                            |
| GRMZM2G457411    | -39  | protein binding zinc ion binding                                                                                                                                                                                                                                          |
| GRMZM2G053692    | -61  | structural molecule activity protein binding retrograde vesicle-mediated transport, Golgi to ER COPI vesicle coat                                                                                                                                                         |
| GRMZM2G138268    | -21  | nucleus regulation of transcription                                                                                                                                                                                                                                       |
| GRMZM2G366142    | -91  | No Description                                                                                                                                                                                                                                                            |
| GRMZM2G013016    | -109 | No Description                                                                                                                                                                                                                                                            |
| GRMZM2G053284    | -49  | protein binding ATP binding                                                                                                                                                                                                                                               |
| GRMZM2G177518    | -179 | No Description                                                                                                                                                                                                                                                            |
| GRMZM2G004314    | -184 | No Description                                                                                                                                                                                                                                                            |
| GRMZM2G065290    | -72  | transcription factor activity sequence-specific DNA binding regulation of transcription                                                                                                                                                                                   |
| GRMZM2G021704    | -17  | dihydroorotase activity hydrolase activity hydrolase activity, acting on carbon-nitrogen (but not peptide) bonds, in cyclic amides pyrimidine base biosynthetic process                                                                                                   |
| GRMZM2G039246    | -131 | two-component signal transduction system (phosphorelay) signal transducer activity                                                                                                                                                                                        |
| GRMZM2G702144    | -71  | No Description                                                                                                                                                                                                                                                            |
| GRMZM2G159724    | -17  | malic enzyme activity malate metabolic process oxidoreductase activity oxidoreductase activity, acting on the CH-OH group of donors, NAD or NADP as acceptor metal ion binding NAD or NADH binding oxidation reduction                                                    |
| GRMZM5G814782    | -186 | No Description                                                                                                                                                                                                                                                            |
| GRMZM5G814803    | -24  | No Description                                                                                                                                                                                                                                                            |
| AC155377.1 FG002 | -55  | aspartic-type endopeptidase activity proteolysis                                                                                                                                                                                                                          |
| GRMZM2G481362    | -119 | hydrolase activity                                                                                                                                                                                                                                                        |
| GRMZM2G467147    | -154 | protein binding defense response                                                                                                                                                                                                                                          |
| GRMZM2G066978    | -152 | No Description                                                                                                                                                                                                                                                            |
| GRMZM2G130173    | -117 | structural constituent of ribosome intracellular ribosome translation homoiothermy metal ion binding lice binding response to freezing                                                                                                                                    |
| GRMZM5G844094    | -138 | zinc ion binding                                                                                                                                                                                                                                                          |
| AC203768.3 FG005 | -153 | metalloendopeptidase activity proteolysis membrane                                                                                                                                                                                                                        |
| GRMZM2G027253    | -199 | DNA binding regulation of transcription, DNA-dependent                                                                                                                                                                                                                    |
| GRMZM2G119865    | -9   | DNA binding transcription factor activity structural constituent of ribosome intracellular ribosome regulation of transcription, DNA-dependent translation                                                                                                                |
| GRMZM2G169333    | -146 | nucleic acid binding damaged DNA binding DNA-(apurinic or apyrimidinic site) lyase activity DNA repair base-excision repair nucleotide-excision repair zinc ion binding oxidized purine base lesion DNA N-glycosylase activity hydrolase activity, hydrolyzing N-glycosyl |
| GRMZM2G076370    | -156 | electron carrier activity                                                                                                                                                                                                                                                 |
| GRMZM2G406413    | -140 | DNA binding DNA-directed RNA polymerase activity nucleus transcription                                                                                                                                                                                                    |
| GRMZM2G095404    | -63  | peroxidase activity response to oxidative stress heme binding oxidation reduction                                                                                                                                                                                         |
| AC187885.3 FG002 | -72  | No Description                                                                                                                                                                                                                                                            |
| GRMZM2G127080    | -181 | No Description                                                                                                                                                                                                                                                            |
| GRMZM2G061492    | -30  | cysteine-type endopeptidase activity protein binding proteolysis                                                                                                                                                                                                          |
| GRMZM2G358491    | -90  | No Description                                                                                                                                                                                                                                                            |

|                  |      |                                                                                                                                                                            |
|------------------|------|----------------------------------------------------------------------------------------------------------------------------------------------------------------------------|
| GRMZM2G378167    | -60  | No Description                                                                                                                                                             |
| GRMZM2G047607    | -190 | No Description                                                                                                                                                             |
| GRMZM2G322220    | -196 | transporter activity oligopeptide transport membrane                                                                                                                       |
| GRMZM2G070075    | -141 | No Description                                                                                                                                                             |
| GRMZM2G371058    | -152 | DNA binding zinc ion binding regulation of transcription                                                                                                                   |
| GRMZM2G080493    | -123 | DNA binding intracellular nucleus regulation of transcription, DNA-dependent sequence-specific DNA binding                                                                 |
| GRMZM2G039173    | -63  | membrane                                                                                                                                                                   |
| AC226373.2_FG009 | -124 | No Description                                                                                                                                                             |
| GRMZM2G375904    | -14  | protein kinase activity protein serine/threonine kinase activity ATP binding protein amino acid phosphorylation                                                            |
| GRMZM2G440452    | -73  | type I hypersensitivity                                                                                                                                                    |
| GRMZM2G036837    | -125 | nucleic acid binding zinc ion binding                                                                                                                                      |
| GRMZM2G017285    | -171 | catalytic activity 3-beta-hydroxy-delta5-steroid dehydrogenase activity steroid biosynthetic process biosynthetic process cellular metabolic process coenzyme binding      |
| GRMZM2G056145    | -181 | nucleic acid binding zinc ion binding homoiothermy ice binding response to freezing                                                                                        |
| GRMZM2G473485    | -76  | No Description                                                                                                                                                             |
| GRMZM2G111898    | -99  | No Description                                                                                                                                                             |
| GRMZM2G450228    | -197 | No Description                                                                                                                                                             |
| GRMZM2G107556    | -193 | No Description                                                                                                                                                             |
| GRMZM2G477221    | -186 | binding                                                                                                                                                                    |
| GRMZM2G035395    | -182 | binding                                                                                                                                                                    |
| GRMZM2G389510    | -10  | No Description                                                                                                                                                             |
| GRMZM2G372985    | -183 | No Description                                                                                                                                                             |
| GRMZM2G0860590   | -26  | No Description                                                                                                                                                             |
| GRMZM2G154881    | -82  | hydrolase activity                                                                                                                                                         |
| GRMZM2G078723    | -21  | No Description                                                                                                                                                             |
| GRMZM2G142919    | -132 | tumor necrosis factor receptor binding immune response membrane transmembrane transport                                                                                    |
| GRMZM2G334105    | -22  | No Description                                                                                                                                                             |
| GRMZM2G447005    | -22  | No Description                                                                                                                                                             |
| GRMZM2G00569     | -18  | No Description                                                                                                                                                             |
| GRMZM2G349074    | -95  | No Description                                                                                                                                                             |
| GRMZM2G303168    | -19  | No Description                                                                                                                                                             |
| GRMZM2G0856391   | -190 | No Description                                                                                                                                                             |
| GRMZM2G139574    | -152 | transferase activity, transferring glycosyl groups                                                                                                                         |
| GRMZM2G162868    | -151 | No Description                                                                                                                                                             |
| GRMZM2G479869    | -95  | No Description                                                                                                                                                             |
| GRMZM2G375222    | -171 | transcription elongation regulator activity membrane positive regulation of RNA elongation from RNA polymerase II promoter protein homooligomerization                     |
| GRMZM2G141873    | -17  | No Description                                                                                                                                                             |
| GRMZM2G456835    | -189 | response to stress                                                                                                                                                         |
| GRMZM2G100146    | -197 | ossification intracellular cell adhesion zinc ion binding                                                                                                                  |
| GRMZM2G361066    | -26  | nucleotide binding ATP-dependent peptidase activity serine-type endopeptidase activity ATP binding proteolysis membrane ATPase activity nucleoside-triphosphatase activity |
| GRMZM2G063672    | -121 | nucleotide binding ATP binding nucleoside-triphosphatase activity                                                                                                          |
| GRMZM2G014066    | -167 | No Description                                                                                                                                                             |
| GRMZM2G307756    | -75  | No Description                                                                                                                                                             |
| GRMZM2G0873546   | -88  | No Description                                                                                                                                                             |
| GRMZM2G029292    | -189 | transcription factor activity sequence-specific DNA binding regulation of transcription                                                                                    |
| GRMZM2G080622    | -108 | No Description                                                                                                                                                             |
| GRMZM2G173868    | -198 | mannosyl-oligosaccharide 1,2-alpha-mannosidase activity calcium ion binding membrane                                                                                       |
| GRMZM2G076450    | -82  | protein binding                                                                                                                                                            |
| GRMZM2G116273    | -22  | No Description                                                                                                                                                             |
| GRMZM2G110714    | -136 | catalytic activity tricarboxylic acid cycle phosphoenolpyruvate carboxylase activity carbon fixation                                                                       |
| GRMZM2G420772    | -184 | No Description                                                                                                                                                             |
| GRMZM2G555108    | -16  | No Description                                                                                                                                                             |
| GRMZM2G012031    | -88  | protein binding                                                                                                                                                            |
| GRMZM2G107408    | -163 | No Description                                                                                                                                                             |
| GRMZM2G344323    | -161 | No Description                                                                                                                                                             |
| GRMZM2G0884407   | -18  | No Description                                                                                                                                                             |
| GRMZM2G410033    | -189 | amino acid transport membrane                                                                                                                                              |
| GRMZM2G0874483   | -165 | No Description                                                                                                                                                             |
| GRMZM2G396540    | -17  | No Description                                                                                                                                                             |
| GRMZM2G125175    | -185 | No Description                                                                                                                                                             |
| GRMZM2G109299    | -158 | No Description                                                                                                                                                             |
| GRMZM2G355631    | -102 | No Description                                                                                                                                                             |
| GRMZM2G024615    | -66  | catalytic activity membrane                                                                                                                                                |
| GRMZM2G315431    | -63  | ubiquitin ligase complex ubiquitin-protein ligase activity binding protein ubiquitination                                                                                  |
| GRMZM2G414813    | -30  | transporter activity transport membrane transmembrane transport                                                                                                            |
| GRMZM2G339214    | -135 | No Description                                                                                                                                                             |
| GRMZM2G1446673   | -17  | protein folding heat shock protein binding unfolded protein binding                                                                                                        |
| GRMZM2G307588    | -131 | DNA binding nucleus                                                                                                                                                        |
| AC225790.2_FG003 | -86  | structural molecule activity cell adhesion actin cytoskeleton homoiothermy ice binding response to freezing                                                                |
| GRMZM2G435015    | -164 | nucleus transcription regulator activity regulation of transcription                                                                                                       |
| AC212732.4_FG005 | -175 | No Description                                                                                                                                                             |
| AC191264.3_FG003 | -122 | No Description                                                                                                                                                             |
| GRMZM2G150683    | -17  | extracellular region iron ion transport cellular iron ion homeostasis ferric iron binding                                                                                  |
| GRMZM2G434696    | -180 | No Description                                                                                                                                                             |
| GRMZM2G702283    | -41  | No Description                                                                                                                                                             |
| GRMZM2G443939    | -33  | protein binding ATP binding apoptosis defense response                                                                                                                     |
| GRMZM2G003625    | -52  | protein binding ATP binding apoptosis defense response                                                                                                                     |
| GRMZM2G163550    | -184 | protein kinase activity ATP binding sugar binding protein amino acid phosphorylation recognition of pollen                                                                 |
| GRMZM2G571844    | -121 | binding                                                                                                                                                                    |
| AC203316.3_FG003 | -108 | No Description                                                                                                                                                             |
| GRMZM2G142565    | -24  | No Description                                                                                                                                                             |
| GRMZM2G420774    | -14  | nucleic acid binding                                                                                                                                                       |
| GRMZM2G123644    | -141 | DNA binding RNA binding                                                                                                                                                    |
| GRMZM2G109142    | -154 | No Description                                                                                                                                                             |
| AC203570.4_FG005 | -186 | No Description                                                                                                                                                             |
| GRMZM2G481009    | -28  | No Description                                                                                                                                                             |
| GRMZM2G133233    | -81  | No Description                                                                                                                                                             |

|               |      |                                                                                                                                                                                               |
|---------------|------|-----------------------------------------------------------------------------------------------------------------------------------------------------------------------------------------------|
| GRMZM2G396049 | -54  | RNA binding RNA processing                                                                                                                                                                    |
| GRMZM2G396049 | -47  | RNA binding RNA processing                                                                                                                                                                    |
| GRMZM2G315885 | -53  | RNA binding RNA processing                                                                                                                                                                    |
| GRMZM2G025243 | -188 | alcohol dehydrogenase (NAD) activity metabolic process 2,3-dihydro-2,3-dihydroxybenzoate dehydrogenase activity enterobactin biosynthetic process oxidoreductase activity oxidation reduction |
| GRMZM5G896983 | -18  | No Description                                                                                                                                                                                |

**Supplementary Table S5 (Continued) - Motif 5**

| Gene ID          | Coordinate motif start | Annotation                                                                                                                                                                                                                                                                                                                                                                               |
|------------------|------------------------|------------------------------------------------------------------------------------------------------------------------------------------------------------------------------------------------------------------------------------------------------------------------------------------------------------------------------------------------------------------------------------------|
| GRMZM2G352381    | -67                    | No Description                                                                                                                                                                                                                                                                                                                                                                           |
| GRMZM2G131332    | -4                     | No Description                                                                                                                                                                                                                                                                                                                                                                           |
| GRMZM2G111300    | -56                    | zinc ion transmembrane transporter activity zinc ion transport membrane integral to membrane oxidoreductase activity, acting on paired donors, with incorporation or reduction of molecular oxygen, reduced pteridine as one donor, and incorporation of one atom of oxygen metal ion transport metal ion transmembrane transporter activity transmembrane transport oxidation reduction |
| GRMZM2G169207    | -173                   | No Description                                                                                                                                                                                                                                                                                                                                                                           |
| GRMZM2G430029    | -89                    | No Description                                                                                                                                                                                                                                                                                                                                                                           |
| GRMZM2G012127    | -115                   | No Description                                                                                                                                                                                                                                                                                                                                                                           |
| GRMZM2G355940    | -43                    | translation release factor activity translational termination                                                                                                                                                                                                                                                                                                                            |
| GRMZM2G398758    | -66                    | DNA binding                                                                                                                                                                                                                                                                                                                                                                              |
| GRMZM2G089343    | -13                    | No Description                                                                                                                                                                                                                                                                                                                                                                           |
| GRMZM2G134389    | -14                    | protein tyrosine phosphatase activity dephosphorylation phosphatase activity                                                                                                                                                                                                                                                                                                             |
| GRMZM2G028986    | -10                    | heme binding                                                                                                                                                                                                                                                                                                                                                                             |
| GRMZM2G027241    | -138                   | No Description                                                                                                                                                                                                                                                                                                                                                                           |
| GRMZM2G465046    | -180                   | lipid metabolic process hydrolase activity, acting on ester bonds                                                                                                                                                                                                                                                                                                                        |
| GRMZM2G465046    | -176                   | lipid metabolic process hydrolase activity, acting on ester bonds                                                                                                                                                                                                                                                                                                                        |
| GRMZM2G077696    | -75                    | No Description                                                                                                                                                                                                                                                                                                                                                                           |
| GRMZM2G434839    | -101                   | protein folding heat shock protein binding unfolded protein binding                                                                                                                                                                                                                                                                                                                      |
| GRMZM5G869587    | -147                   | No Description                                                                                                                                                                                                                                                                                                                                                                           |
| GRMZM5G820788    | -146                   | No Description                                                                                                                                                                                                                                                                                                                                                                           |
| GRMZM2G095441    | -6                     | SNAP receptor activity protein binding intracellular protein transport membrane vesicle-mediated transport                                                                                                                                                                                                                                                                               |
| GRMZM2G035749    | -182                   | polysaccharide catabolic process structural constituent of ribosome intracellular ribosome translation beta-amylase activity                                                                                                                                                                                                                                                             |
| GRMZM2G371030    | -108                   | No Description                                                                                                                                                                                                                                                                                                                                                                           |
| GRMZM2G178278    | -79                    | vesicle-mediated transport                                                                                                                                                                                                                                                                                                                                                               |
| GRMZM2G348039    | -197                   | No Description                                                                                                                                                                                                                                                                                                                                                                           |
| GRMZM2G113057    | -172                   | No Description                                                                                                                                                                                                                                                                                                                                                                           |
| GRMZM2G055899    | -57                    | catalytic activity branched-chain-amino-acid transaminase activity metabolic process branched chain family amino acid metabolic process                                                                                                                                                                                                                                                  |
| GRMZM2G472236    | -44                    | homeothermy ice binding response to freezing                                                                                                                                                                                                                                                                                                                                             |
| GRMZM2G432566    | -25                    | protein binding intracellular zinc ion binding                                                                                                                                                                                                                                                                                                                                           |
| GRMZM5G890241    | -93                    | protein binding                                                                                                                                                                                                                                                                                                                                                                          |
| GRMZM2G153536    | -6                     | catalytic activity branched-chain-amino-acid transaminase activity metabolic process branched chain family amino acid metabolic process                                                                                                                                                                                                                                                  |
| AC196161.3_FG002 | -150                   | No Description                                                                                                                                                                                                                                                                                                                                                                           |
| GRMZM2G142390    | -120                   | protein kinase activity protein serine/threonine kinase activity ATP binding protein amino acid phosphorylation                                                                                                                                                                                                                                                                          |
| GRMZM2G142390    | -116                   | protein kinase activity protein serine/threonine kinase activity ATP binding protein amino acid phosphorylation                                                                                                                                                                                                                                                                          |
| GRMZM2G143703    | -139                   | No Description                                                                                                                                                                                                                                                                                                                                                                           |
| GRMZM2G058630    | -178                   | phosphatidylcholine-sterol O-acyltransferase activity lipid metabolic process                                                                                                                                                                                                                                                                                                            |
| GRMZM2G315862    | -157                   | No Description                                                                                                                                                                                                                                                                                                                                                                           |
| GRMZM2G459540    | -11                    | intracellular zinc ion binding                                                                                                                                                                                                                                                                                                                                                           |
| GRMZM2G050273    | -67                    | No Description                                                                                                                                                                                                                                                                                                                                                                           |
| GRMZM2G368827    | -178                   | membrane                                                                                                                                                                                                                                                                                                                                                                                 |
| AC20630.4_FG001  | -147                   | drug transmembrane transport drug transmembrane transporter activity antiporter activity membrane transmembrane transport                                                                                                                                                                                                                                                                |
| GRMZM2G352381    | -67                    | No Description                                                                                                                                                                                                                                                                                                                                                                           |
| GRMZM2G356718    | -169                   | DNA binding catalytic activity                                                                                                                                                                                                                                                                                                                                                           |
| GRMZM2G176630    | -137                   | sugar binding protein amino acid glycosylation galactosyltransferase activity membrane homeothermy ice binding response to freezing                                                                                                                                                                                                                                                      |
| GRMZM2G085303    | -19                    | No Description                                                                                                                                                                                                                                                                                                                                                                           |
| GRMZM2G312061    | -20                    | cysteine-type endopeptidase inhibitor activity                                                                                                                                                                                                                                                                                                                                           |
| GRMZM2G394783    | -121                   | monooxygenase activity iron ion binding electron carrier activity heme binding oxidation reduction                                                                                                                                                                                                                                                                                       |
| AC191692.3_FG001 | -136                   | No Description                                                                                                                                                                                                                                                                                                                                                                           |
| GRMZM2G115775    | -121                   | protein binding membrane vesicle-mediated transport                                                                                                                                                                                                                                                                                                                                      |
| AC217947.4_FG002 | -100                   | iron ion binding FMN binding oxidoreductase activity oxidation reduction                                                                                                                                                                                                                                                                                                                 |
| GRMZM2G459746    | -7                     | nucleic acid binding                                                                                                                                                                                                                                                                                                                                                                     |
| GRMZM2G146207    | -105                   | No Description                                                                                                                                                                                                                                                                                                                                                                           |
| GRMZM2G129979    | -154                   | nucleus                                                                                                                                                                                                                                                                                                                                                                                  |
| GRMZM2G325575    | -47                    | cellular iron ion homeostasis ferric iron binding oxidoreductase activity transition metal ion binding oxidation reduction                                                                                                                                                                                                                                                               |
| GRMZM2G109680    | -142                   | No Description                                                                                                                                                                                                                                                                                                                                                                           |
| GRMZM2G163277    | -124                   | No Description                                                                                                                                                                                                                                                                                                                                                                           |
| GRMZM2G071745    | -58                    | heme binding                                                                                                                                                                                                                                                                                                                                                                             |
| GRMZM2G031996    | -87                    | No Description                                                                                                                                                                                                                                                                                                                                                                           |
| GRMZM2G011383    | -183                   | No Description                                                                                                                                                                                                                                                                                                                                                                           |
| GRMZM2G166719    | -195                   | protein kinase activity protein serine/threonine kinase activity ATP binding protein amino acid phosphorylation                                                                                                                                                                                                                                                                          |
| GRMZM5G894340    | -197                   | No Description                                                                                                                                                                                                                                                                                                                                                                           |
| GRMZM2G044348    | -20                    | aspartic-type endopeptidase activity integral to membrane                                                                                                                                                                                                                                                                                                                                |
| GRMZM2G018403    | -95                    | RNA binding structural constituent of ribosome intracellular ribosome translation                                                                                                                                                                                                                                                                                                        |
| GRMZM2G366434    | -191                   | DNA binding transcription factor activity regulation of transcription, DNA-dependent                                                                                                                                                                                                                                                                                                     |
| GRMZM2G074604    | -170                   | catalytic activity cytoplasm L-phenylalanine catabolic process biosynthetic process ammonia-lyase activity                                                                                                                                                                                                                                                                               |
| GRMZM2G075366    | -131                   | No Description                                                                                                                                                                                                                                                                                                                                                                           |
| GRMZM2G038279    | -62                    | chromatin DNA binding nucleus regulation of transcription, DNA-dependent                                                                                                                                                                                                                                                                                                                 |
| GRMZM2G104920    | -193                   | ubiquitin ligase complex protein phosphatase type 2A complex ubiquitin-protein ligase activity protein binding signal transduction zinc ion binding protein phosphatase type 2A regulator activity protein ubiquitination homeothermy ice binding response to freezing                                                                                                                   |
| GRMZM5G861978    | -163                   | structural constituent of ribosome intracellular ribosome translation                                                                                                                                                                                                                                                                                                                    |
| GRMZM2G402797    | -65                    | No Description                                                                                                                                                                                                                                                                                                                                                                           |
| AC197340.3_FG004 | -43                    | No Description                                                                                                                                                                                                                                                                                                                                                                           |
| GRMZM2G422147    | -45                    | No Description                                                                                                                                                                                                                                                                                                                                                                           |
| GRMZM2G106650    | -116                   | monooxygenase activity iron ion binding electron carrier activity heme binding oxidation reduction                                                                                                                                                                                                                                                                                       |
| GRMZM2G176129    | -173                   | oxidoreductase activity, acting on NADH or NADPH, quinone or similar compound as acceptor oxidation reduction                                                                                                                                                                                                                                                                            |
| GRMZM2G026095    | -27                    | metabolic process zinc ion binding hydrolase activity                                                                                                                                                                                                                                                                                                                                    |
| GRMZM2G004188    | -189                   | DNA binding catalytic activity nuclease activity DNA repair                                                                                                                                                                                                                                                                                                                              |

|                  |      |                                                                                                                                                                                                                                                                                      |
|------------------|------|--------------------------------------------------------------------------------------------------------------------------------------------------------------------------------------------------------------------------------------------------------------------------------------|
| GRMZM2G163297    | -171 | nucleic acid binding RNA binding                                                                                                                                                                                                                                                     |
| GRMZM2G146292    | -170 | No Description                                                                                                                                                                                                                                                                       |
| AC202534.2 FG007 | -191 | No Description                                                                                                                                                                                                                                                                       |
| GRMZM2G106604    | -89  | No Description                                                                                                                                                                                                                                                                       |
| GRMZM2G021051    | -165 | iron ion binding oxidoreductase activity oxidation reduction                                                                                                                                                                                                                         |
| GRMZM2G398758    | -66  | DNA binding                                                                                                                                                                                                                                                                          |
| GRMZM2G152370    | -118 | No Description                                                                                                                                                                                                                                                                       |
| GRMZM2G021243    | -9   | No Description                                                                                                                                                                                                                                                                       |
| GRMZM2G428905    | -176 | No Description                                                                                                                                                                                                                                                                       |
| GRMZM2G363879    | -19  | ribonucleoside-diphosphate reductase activity ribonucleoside-diphosphate reductase complex DNA replication                                                                                                                                                                           |
| GRMZM2G074373    | -19  | DNA binding transcription factor activity nucleus transcription, DNA-dependent regulation of transcription, DNA-dependent sequence-specific DNA binding regulation of transcription protein dimerization activity                                                                    |
| GRMZM2G005753    | -103 | protein folding heat shock protein binding unfolded protein binding                                                                                                                                                                                                                  |
| GRMZM2G016668    | -102 | protein binding zinc ion binding                                                                                                                                                                                                                                                     |
| GRMZM2G018022    | -99  | metabolic process nucleotidyltransferase activity                                                                                                                                                                                                                                    |
| GRMZM2G135095    | -103 | structural constituent of ribosome intracellular ribosome translation                                                                                                                                                                                                                |
| GRMZM2G125216    | -59  | No Description                                                                                                                                                                                                                                                                       |
| AC209810.3 FG002 | -22  | cysteine-type endopeptidase activity proteolysis cysteine-type peptidase activity                                                                                                                                                                                                    |
| GRMZM2G013016    | -107 | No Description                                                                                                                                                                                                                                                                       |
| GRMZM2G113319    | -176 | nucleotide binding motor activity ATP binding myosin complex nucleoside-triphosphatase activity                                                                                                                                                                                      |
| AC155377.1 FG001 | -131 | nucleotide binding motor activity ATP binding myosin complex nucleoside-triphosphatase activity                                                                                                                                                                                      |
| GRMZM2G094490    | -114 | nucleotide binding ATP-dependent peptidase activity serine-type endopeptidase activity ATP binding proteolysis membrane ATPase activity nucleoside-triphosphatase activity                                                                                                           |
| GRMZM2G552418    | -128 | No Description                                                                                                                                                                                                                                                                       |
| GRMZM2G100568    | -189 | No Description                                                                                                                                                                                                                                                                       |
| GRMZM2G005622    | -11  | No Description                                                                                                                                                                                                                                                                       |
| GRMZM2G027253    | -197 | DNA binding regulation of transcription, DNA-dependent                                                                                                                                                                                                                               |
| GRMZM2G147245    | -35  | monooxygenase activity iron ion binding electron carrier activity heme binding oxidation reduction                                                                                                                                                                                   |
| GRMZM2G063961    | -199 | protein kinase activity protein serine/threonine kinase activity ATP binding protein amino acid phosphorylation                                                                                                                                                                      |
| GRMZM2G082037    | -13  | metabolic process transferase activity, transferring hexosyl groups                                                                                                                                                                                                                  |
| GRMZM2G381709    | -32  | small conjugating protein ligase activity post-translational protein modification regulation of protein metabolic process                                                                                                                                                            |
| GRMZM2G036837    | -125 | nucleic acid binding zinc ion binding                                                                                                                                                                                                                                                |
| GRMZM2G024674    | -136 | No Description                                                                                                                                                                                                                                                                       |
| GRMZM2G109627    | -10  | DNA binding regulation of transcription                                                                                                                                                                                                                                              |
| AC211474.3 FG006 | -132 | No Description                                                                                                                                                                                                                                                                       |
| AC211474.3 FG006 | -78  | No Description                                                                                                                                                                                                                                                                       |
| GRMZM2G074824    | -78  | catalytic activity                                                                                                                                                                                                                                                                   |
| GRMZM2G099052    | -131 | No Description                                                                                                                                                                                                                                                                       |
| GRMZM2G168675    | -38  | No Description                                                                                                                                                                                                                                                                       |
| GRMZM2G347471    | -197 | No Description                                                                                                                                                                                                                                                                       |
| GRMZM2G047412    | -134 | No Description                                                                                                                                                                                                                                                                       |
| GRMZM2G028986    | -10  | heme binding                                                                                                                                                                                                                                                                         |
| GRMZM2G361066    | -24  | nucleotide binding ATP-dependent peptidase activity serine-type endopeptidase activity ATP binding proteolysis membrane ATPase activity nucleoside-triphosphatase activity                                                                                                           |
| GRMZM2G025031    | -172 | uroporphyrinogen decarboxylase activity porphyrin biosynthetic process                                                                                                                                                                                                               |
| GRMZM2G169584    | -24  | ATP binding apoptosis                                                                                                                                                                                                                                                                |
| GRMZM2G047214    | -112 | No Description                                                                                                                                                                                                                                                                       |
| GRMZM2G074462    | -199 | catalytic activity carbohydrate metabolic process carbohydrate binding                                                                                                                                                                                                               |
| GRMZM2G085934    | -119 | No Description                                                                                                                                                                                                                                                                       |
| GRMZM2G170420    | -181 | No Description                                                                                                                                                                                                                                                                       |
| GRMZM2G125448    | -195 | transferase activity, transferring acyl groups other than amino-acyl groups                                                                                                                                                                                                          |
| GRMZM2G041388    | -178 | No Description                                                                                                                                                                                                                                                                       |
| GRMZM2G325008    | -122 | hydrolase activity, hydrolyzing O-glycosyl compounds carbohydrate metabolic process cellular process                                                                                                                                                                                 |
| GRMZM2G083555    | -195 | No Description                                                                                                                                                                                                                                                                       |
| GRMZM2G027851    | -173 | voltage-gated potassium channel activity cation transport potassium ion transport sodium ion transport regulation of pH voltage-gated potassium channel complex solute:hydrogen antiporter activity sodium:hydrogen antiporter activity integral to membrane transmembrane transport |
| GRMZM5G838435    | -45  | catalytic activity                                                                                                                                                                                                                                                                   |
| GRMZM2G115579    | -51  | No Description                                                                                                                                                                                                                                                                       |
| AC203972.3 FG001 | -59  | structural constituent of ribosome ATP binding intracellular ribosome translation apoptosis defense response                                                                                                                                                                         |
| GRMZM2G088140    | -51  | DNA binding transcription factor activity nucleus transcription, DNA-dependent regulation of transcription, DNA-dependent sequence-specific DNA binding regulation of transcription protein dimerization activity                                                                    |
| GRMZM2G405170    | -198 | DNA binding regulation of transcription, DNA-dependent                                                                                                                                                                                                                               |
| GRMZM2G043749    | -160 | No Description                                                                                                                                                                                                                                                                       |
| GRMZM2G314593    | -99  | No Description                                                                                                                                                                                                                                                                       |
| GRMZM2G110145    | -163 | membrane cellulose synthase (UDP-forming) activity cellulose biosynthetic process                                                                                                                                                                                                    |
| GRMZM2G021277    | -123 | cellular amino acid and derivative metabolic process carboxylase activity carboxylic acid metabolic process pyridoxal phosphate binding                                                                                                                                              |
| GRMZM2G062541    | -88  | nucleus transcription regulator activity regulation of transcription                                                                                                                                                                                                                 |
| GRMZM2G062541    | -84  | nucleus transcription regulator activity regulation of transcription                                                                                                                                                                                                                 |
| GRMZM2G415579    | -103 | oxidoreductase activity oxidation reduction                                                                                                                                                                                                                                          |
| GRMZM2G027241    | -138 | No Description                                                                                                                                                                                                                                                                       |
| GRMZM2G107299    | -22  | No Description                                                                                                                                                                                                                                                                       |
| GRMZM2G070279    | -60  | alcohol dehydrogenase (NAD) activity metabolic process 2,3-dihydro-2,3-dihydroxybenzoate dehydrogenase activity enterobactin biosynthetic process oxidoreductase activity oxidation reduction                                                                                        |
| GRMZM2G018631    | -34  | protein binding zinc ion binding                                                                                                                                                                                                                                                     |
| GRMZM5G871174    | -138 | No Description                                                                                                                                                                                                                                                                       |
| GRMZM2G352381    | -67  | No Description                                                                                                                                                                                                                                                                       |
| GRMZM2G161368    | -188 | No Description                                                                                                                                                                                                                                                                       |
| GRMZM2G169207    | -173 | No Description                                                                                                                                                                                                                                                                       |
| GRMZM5G836606    | -5   | No Description                                                                                                                                                                                                                                                                       |
| GRMZM2G003307    | -58  | No Description                                                                                                                                                                                                                                                                       |
| GRMZM2G064773    | -90  | protein serine/threonine kinase activity ATP binding protein amino acid phosphorylation                                                                                                                                                                                              |
| GRMZM2G053631    | -11  | nucleic acid binding intracellular nucleobase, nucleoside, nucleotide and nucleic acid metabolic process 3'-5' exonuclease activity                                                                                                                                                  |
| GRMZM2G398758    | -66  | DNA binding                                                                                                                                                                                                                                                                          |
| GRMZM5G899656    | -86  | catalytic activity phosphoribosylamine-glycine ligase activity ATP binding purine base biosynthetic process                                                                                                                                                                          |
| GRMZM2G413044    | -16  | hydrolase activity, hydrolyzing O-glycosyl compounds cell wall carbohydrate metabolic process cellular glucan metabolic process xyloolucan:xyloolucosyl transferase activity apoplast                                                                                                |
| GRMZM2G082198    | -43  | nucleic acid binding                                                                                                                                                                                                                                                                 |
| GRMZM2G062318    | -99  | No Description                                                                                                                                                                                                                                                                       |
| GRMZM2G402156    | -48  | DNA binding                                                                                                                                                                                                                                                                          |
| AC197699.3 FG008 | -21  | No Description                                                                                                                                                                                                                                                                       |
| GRMZM2G448656    | -32  | No Description                                                                                                                                                                                                                                                                       |
| GRMZM2G083716    | -100 | protein binding ATP binding cytoplasm protein folding protein refolding cellular protein metabolic process                                                                                                                                                                           |

|                  |      |                                                                                                                                                                                                                                                          |
|------------------|------|----------------------------------------------------------------------------------------------------------------------------------------------------------------------------------------------------------------------------------------------------------|
| AC187789.3_FG001 | -46  | No Description                                                                                                                                                                                                                                           |
| GRMZM2G455687    | -158 | No Description                                                                                                                                                                                                                                           |
| GRMZM2G138370    | -179 | No Description                                                                                                                                                                                                                                           |
| GRMZM2G134049    | -114 | No Description                                                                                                                                                                                                                                           |
| GRMZM2G047867    | -55  | catalytic activity                                                                                                                                                                                                                                       |
| GRMZM2G081474    | -22  | histone deacetylase activity histone deacetylation acetoin metabolic process                                                                                                                                                                             |
| GRMZM2G305238    | -51  | No Description                                                                                                                                                                                                                                           |
| GRMZM2G029690    | -186 | protein binding zinc ion binding                                                                                                                                                                                                                         |
| GRMZM2G028254    | -19  | No Description                                                                                                                                                                                                                                           |
| GRMZM2G451746    | -99  | No Description                                                                                                                                                                                                                                           |
| GRMZM2G116452    | -176 | peroxidase activity response to oxidative stress heme binding oxidation reduction                                                                                                                                                                        |
| GRMZM2G704352    | -113 | No Description                                                                                                                                                                                                                                           |
| GRMZM2G121360    | -179 | metal ion transport metal ion binding                                                                                                                                                                                                                    |
| GRMZM5G828123    | -18  | No Description                                                                                                                                                                                                                                           |
| GRMZM5G828987    | -59  | hydrolase activity, hydrolyzing O-glycosyl compounds carbohydrate metabolic process                                                                                                                                                                      |
| GRMZM2G126821    | -155 | structural constituent of ribosome intracellular ribosome translation small ribosomal subunit                                                                                                                                                            |
| GRMZM2G358931    | -174 | structural constituent of ribosome cyclin-dependent protein kinase inhibitor activity histamine receptor activity intracellular nucleus ribosome translation cell cycle arrest G-protein coupled receptor protein signaling pathway integral to membrane |
| GRMZM5G809743    | -135 | No Description                                                                                                                                                                                                                                           |
| GRMZM2G022907    | -18  | No Description                                                                                                                                                                                                                                           |
| GRMZM2G139852    | -93  | No Description                                                                                                                                                                                                                                           |
| GRMZM2G153536    | -8   | catalytic activity branched-chain-amino-acid transaminase activity metabolic process branched chain family amino acid metabolic process                                                                                                                  |
| GRMZM2G085427    | -131 | DNA binding                                                                                                                                                                                                                                              |
| AC231441.1_FG004 | -152 | No Description                                                                                                                                                                                                                                           |
| GRMZM2G161337    | -105 | tryptophan biosynthetic process anthranilate synthase activity biosynthetic process oxo-acid-lvase activity                                                                                                                                              |
| GRMZM2G345330    | -164 | No Description                                                                                                                                                                                                                                           |
| GRMZM2G174284    | -66  | transcription factor activity regulation of transcription, DNA-dependent sequence-specific DNA binding                                                                                                                                                   |
| GRMZM2G013299    | -16  | glutathione peroxidase activity response to oxidative stress oxidation reduction                                                                                                                                                                         |
| GRMZM2G552278    | -164 | No Description                                                                                                                                                                                                                                           |
| GRMZM5G828488    | -17  | No Description                                                                                                                                                                                                                                           |
| GRMZM2G030636    | -192 | No Description                                                                                                                                                                                                                                           |
| GRMZM2G089291    | -78  | iron ion binding sodium ion transport regulation of pH electron carrier activity sodium:hydrogen antiporter activity membrane integral to membrane oxidoreductase activity FAD binding oxidation reduction                                               |
| GRMZM2G001895    | -120 | binding heat shock protein binding                                                                                                                                                                                                                       |
| GRMZM5G841743    | -48  | No Description                                                                                                                                                                                                                                           |
| GRMZM2G030436    | -136 | transferase activity, transferring acyl groups other than amino-acyl groups                                                                                                                                                                              |
| GRMZM2G123418    | -20  | No Description                                                                                                                                                                                                                                           |
| GRMZM2G034680    | -59  | No Description                                                                                                                                                                                                                                           |
| GRMZM2G303010    | -190 | No Description                                                                                                                                                                                                                                           |
| GRMZM2G119339    | -22  | No Description                                                                                                                                                                                                                                           |
| GRMZM2G008250    | -116 | No Description                                                                                                                                                                                                                                           |
| GRMZM2G042313    | -44  | structural constituent of ribosome intracellular ribosome translation transport amino acid transport amino acid transmembrane transporter activity membrane transmembrane transport                                                                      |
| GRMZM2G093809    | -60  | protein kinase activity protein serine/threonine kinase activity protein binding ATP binding protein amino acid phosphorylation                                                                                                                          |
| GRMZM2G009117    | -190 | metal ion transport metal ion binding                                                                                                                                                                                                                    |
| GRMZM2G472671    | -90  | nucleus type I hypersensitivity transcription regulator activity regulation of transcription                                                                                                                                                             |
| GRMZM2G340305    | -56  | DNA binding regulation of transcription                                                                                                                                                                                                                  |
| GRMZM2G016439    | -106 | two-component signal transduction system (phosphorelay) signal transducer activity                                                                                                                                                                       |
| GRMZM2G449163    | -112 | protein tyrosine phosphatase activity dephosphorylation phosphatase activity                                                                                                                                                                             |
| GRMZM2G160560    | -21  | membrane                                                                                                                                                                                                                                                 |
| GRMZM2G564469    | -174 | No Description                                                                                                                                                                                                                                           |
| GRMZM2G101105    | -41  | RNA binding double-stranded RNA binding ribonuclease III activity intracellular RNA processing                                                                                                                                                           |
| GRMZM2G703910    | -101 | No Description                                                                                                                                                                                                                                           |
| GRMZM2G067626    | -18  | No Description                                                                                                                                                                                                                                           |
| GRMZM2G131591    | -187 | protein binding zinc ion binding                                                                                                                                                                                                                         |
| GRMZM2G135866    | -189 | protein binding zinc ion binding                                                                                                                                                                                                                         |
| GRMZM2G459291    | -22  | catalytic activity                                                                                                                                                                                                                                       |
| GRMZM5G830585    | -77  | No Description                                                                                                                                                                                                                                           |
| GRMZM2G145412    | -112 | No Description                                                                                                                                                                                                                                           |
| GRMZM2G163761    | -19  | transcription factor activity catalytic activity nucleus regulation of transcription, DNA-dependent transcription regulator activity sequence-specific DNA binding cellular metabolic process                                                            |
| GRMZM2G036505    | -151 | No Description                                                                                                                                                                                                                                           |
| GRMZM2G416426    | -134 | No Description                                                                                                                                                                                                                                           |
| GRMZM2G174083    | -115 | motor activity ATP binding myosin complex                                                                                                                                                                                                                |
| GRMZM2G053023    | -176 | cell redox homeostasis                                                                                                                                                                                                                                   |
| GRMZM2G022662    | -147 | translation elongation factor activity translational elongation                                                                                                                                                                                          |
| GRMZM2G104125    | -10  | protein kinase activity protein serine/threonine kinase activity calcium ion binding ATP binding protein amino acid phosphorylation                                                                                                                      |
| GRMZM2G347056    | -54  | methylenetetrahydrofolate reductase (NADPH) activity methionine metabolic process oxidation reduction                                                                                                                                                    |
| GRMZM2G016084    | -163 | RNA binding                                                                                                                                                                                                                                              |
| GRMZM2G023557    | -66  | DNA binding                                                                                                                                                                                                                                              |
| GRMZM2G339848    | -151 | transcription factor activity regulation of transcription, DNA-dependent sequence-specific DNA binding                                                                                                                                                   |
| GRMZM2G140527    | -121 | copper ion binding oxidoreductase activity oxidation reduction                                                                                                                                                                                           |
| GRMZM2G122498    | -180 | monooxygenase activity iron ion binding electron carrier activity heme binding oxidation reduction                                                                                                                                                       |
| AC218998.2_FG001 | -160 | monooxygenase activity iron ion binding electron carrier activity heme binding oxidation reduction                                                                                                                                                       |
| GRMZM2G434299    | -51  | No Description                                                                                                                                                                                                                                           |
| GRMZM2G011896    | -21  | protein kinase activity protein serine/threonine kinase activity protein binding ATP binding protein amino acid phosphorylation                                                                                                                          |
| GRMZM2G074293    | -28  | No Description                                                                                                                                                                                                                                           |
| GRMZM2G171420    | -73  | No Description                                                                                                                                                                                                                                           |
| AC209029.2_FG002 | -173 | No Description                                                                                                                                                                                                                                           |
| GRMZM2G702379    | -148 | No Description                                                                                                                                                                                                                                           |
| GRMZM2G170829    | -98  | mannanase ion binding nutrient reservoir activity apoptosis                                                                                                                                                                                              |
| AC196475.3_FG004 | -175 | methyltransferase activity O-methyltransferase activity protein dimerization activity                                                                                                                                                                    |
| GRMZM2G055520    | -99  | No Description                                                                                                                                                                                                                                           |
| GRMZM2G354618    | -182 | nucleus transcription regulator activity regulation of transcription                                                                                                                                                                                     |
| GRMZM2G702419    | -190 | No Description                                                                                                                                                                                                                                           |
| GRMZM2G036217    | -8   | No Description                                                                                                                                                                                                                                           |
| GRMZM2G425999    | -181 | potassium ion transport potassium ion transmembrane transporter activity membrane                                                                                                                                                                        |
| AC205664.3_FG001 | -78  | No Description                                                                                                                                                                                                                                           |
| AC191692.3_FG001 | -138 | No Description                                                                                                                                                                                                                                           |
| GRMZM2G013214    | -131 | metabolic process oxidoreductase activity homoiothermy lice binding response to freezing oxidation reduction                                                                                                                                             |



|                  |      |                                                                                                                                                                                                                                                                                                                                                                                                                                                                                                                                                                                                                          |
|------------------|------|--------------------------------------------------------------------------------------------------------------------------------------------------------------------------------------------------------------------------------------------------------------------------------------------------------------------------------------------------------------------------------------------------------------------------------------------------------------------------------------------------------------------------------------------------------------------------------------------------------------------------|
| GRMZM2G168171    | -124 | No Description                                                                                                                                                                                                                                                                                                                                                                                                                                                                                                                                                                                                           |
| AC205269.3_FG003 | -19  | No Description                                                                                                                                                                                                                                                                                                                                                                                                                                                                                                                                                                                                           |
| GRMZM2G394945    | -49  | No Description                                                                                                                                                                                                                                                                                                                                                                                                                                                                                                                                                                                                           |
| GRMZM2G122979    | -138 | No Description                                                                                                                                                                                                                                                                                                                                                                                                                                                                                                                                                                                                           |
| GRMZM2G135132    | -198 | 6-phosphofructokinase activity adenosine kinase activity ribokinase activity 6-phosphofructokinase complex D-ribose metabolic process glycolysis purine ribonucleoside salvage                                                                                                                                                                                                                                                                                                                                                                                                                                           |
| GRMZM2G129675    | -46  | No Description                                                                                                                                                                                                                                                                                                                                                                                                                                                                                                                                                                                                           |
| GRMZM2G147780    | -70  | Rho guanyl-nucleotide exchange factor activity                                                                                                                                                                                                                                                                                                                                                                                                                                                                                                                                                                           |
| GRMZM2G076631    | -46  | catalytic activity                                                                                                                                                                                                                                                                                                                                                                                                                                                                                                                                                                                                       |
| GRMZM2G063276    | -9   | hydrolase activity                                                                                                                                                                                                                                                                                                                                                                                                                                                                                                                                                                                                       |
| GRMZM2G081843    | -163 | transporter activity transport membrane integral to membrane transmembrane transport                                                                                                                                                                                                                                                                                                                                                                                                                                                                                                                                     |
| GRMZM2G108147    | -174 | catalytic activity                                                                                                                                                                                                                                                                                                                                                                                                                                                                                                                                                                                                       |
| GRMZM2G008819    | -158 | copper ion binding electron carrier activity                                                                                                                                                                                                                                                                                                                                                                                                                                                                                                                                                                             |
| GRMZM2G138949    | -61  | No Description                                                                                                                                                                                                                                                                                                                                                                                                                                                                                                                                                                                                           |
| GRMZM2G038479    | -24  | nucleus transcription regulator activity regulation of transcription                                                                                                                                                                                                                                                                                                                                                                                                                                                                                                                                                     |
| GRMZM2G406552    | -116 | No Description                                                                                                                                                                                                                                                                                                                                                                                                                                                                                                                                                                                                           |
| GRMZM2G131957    | -21  | nucleic acid binding structural constituent of cell wall                                                                                                                                                                                                                                                                                                                                                                                                                                                                                                                                                                 |
| GRMZM2G332505    | -198 | nucleosome DNA binding nucleus nucleosome assembly amino acid transport membrane                                                                                                                                                                                                                                                                                                                                                                                                                                                                                                                                         |
| GRMZM2G051541    | -55  | No Description                                                                                                                                                                                                                                                                                                                                                                                                                                                                                                                                                                                                           |
| GRMZM2G049839    | -138 | aspartic-type endopeptidase activity proteolysis                                                                                                                                                                                                                                                                                                                                                                                                                                                                                                                                                                         |
| GRMZM2G336761    | -30  | protein binding zinc ion binding                                                                                                                                                                                                                                                                                                                                                                                                                                                                                                                                                                                         |
| GRMZM2G143445    | -159 | No Description                                                                                                                                                                                                                                                                                                                                                                                                                                                                                                                                                                                                           |
| GRMZM2G011052    | -108 | DNA binding catalytic activity DNA topoisomerase (ATP-hydrolyzing) activity copper-exporting ATPase activity copper ion binding ATP binding chromosome DNA topological change ATP biosynthetic process copper ion transport metabolic process mercury ion transmembrane transporter activity ATPase activity, coupled to transmembrane movement of ions, phosphorylative mechanism mercury ion transport membrane integral to membrane hydrolase activity, acting on acid anhydrides, catalyzing transmembrane movement of substances metal ion transport metal ion binding metal ion transmembrane transporter activity |
| GRMZM2G088258    | -11  | oxidoreductase activity                                                                                                                                                                                                                                                                                                                                                                                                                                                                                                                                                                                                  |
| GRMZM2G168888    | -195 | thiosulfate sulfurtransferase activity sulfate transport                                                                                                                                                                                                                                                                                                                                                                                                                                                                                                                                                                 |
| GRMZM2G119640    | -8   | nucleic acid binding zinc ion binding                                                                                                                                                                                                                                                                                                                                                                                                                                                                                                                                                                                    |
| GRMZM2G0862317   | -196 | lipid metabolic process hydrolase activity, acting on ester bonds                                                                                                                                                                                                                                                                                                                                                                                                                                                                                                                                                        |
| AC190636.3_FG005 | -116 | oxidoreductase activity                                                                                                                                                                                                                                                                                                                                                                                                                                                                                                                                                                                                  |
| GRMZM2G133481    | -56  | catalytic activity                                                                                                                                                                                                                                                                                                                                                                                                                                                                                                                                                                                                       |
| GRMZM2G002765    | -164 | catalytic activity                                                                                                                                                                                                                                                                                                                                                                                                                                                                                                                                                                                                       |
| GRMZM2G002765    | -161 | catalytic activity                                                                                                                                                                                                                                                                                                                                                                                                                                                                                                                                                                                                       |
| GRMZM2G110881    | -119 | catalytic activity 3-beta-hydroxy-delta5-steroid dehydrogenase activity steroid biosynthetic process metabolic process oxidoreductase activity cellular metabolic process coenzyme binding                                                                                                                                                                                                                                                                                                                                                                                                                               |
| GRMZM2G0810054   | -55  | No Description                                                                                                                                                                                                                                                                                                                                                                                                                                                                                                                                                                                                           |
| GRMZM2G701300    | -41  | No Description                                                                                                                                                                                                                                                                                                                                                                                                                                                                                                                                                                                                           |
| GRMZM2G171953    | -103 | No Description                                                                                                                                                                                                                                                                                                                                                                                                                                                                                                                                                                                                           |
| GRMZM2G077295    | -28  | protein binding intracellular protein transport ER to Golgi vesicle-mediated transport zinc ion binding COPII vesicle coat                                                                                                                                                                                                                                                                                                                                                                                                                                                                                               |
| GRMZM2G019958    | -196 | No Description                                                                                                                                                                                                                                                                                                                                                                                                                                                                                                                                                                                                           |
| GRMZM2G160664    | -20  | DNA binding ATP binding nucleus DNA replication DNA-dependent DNA replication initiation                                                                                                                                                                                                                                                                                                                                                                                                                                                                                                                                 |
| GRMZM2G102601    | -131 | two-component sensor activity ATP binding signal transduction membrane phosphorylation transferase activity, transferring phosphorus-containing groups                                                                                                                                                                                                                                                                                                                                                                                                                                                                   |
| AC194402.2_FG004 | -110 | No Description                                                                                                                                                                                                                                                                                                                                                                                                                                                                                                                                                                                                           |
| GRMZM2G018943    | -166 | cellular metabolic process                                                                                                                                                                                                                                                                                                                                                                                                                                                                                                                                                                                               |
| GRMZM2G388576    | -116 | No Description                                                                                                                                                                                                                                                                                                                                                                                                                                                                                                                                                                                                           |
| GRMZM2G403218    | -17  | No Description                                                                                                                                                                                                                                                                                                                                                                                                                                                                                                                                                                                                           |
| GRMZM2G162544    | -16  | SNAP receptor activity protein binding intracellular protein transport membrane vesicle-mediated transport                                                                                                                                                                                                                                                                                                                                                                                                                                                                                                               |
| GRMZM2G462081    | -14  | No Description                                                                                                                                                                                                                                                                                                                                                                                                                                                                                                                                                                                                           |
| GRMZM2G701448    | -177 | DNA binding DNA topoisomerase (ATP-hydrolyzing) activity ATP binding chromosome DNA topological change                                                                                                                                                                                                                                                                                                                                                                                                                                                                                                                   |
| GRMZM2G123097    | -186 | No Description                                                                                                                                                                                                                                                                                                                                                                                                                                                                                                                                                                                                           |
| GRMZM2G054745    | -191 | structural molecule activity viral capsid heat shock protein binding                                                                                                                                                                                                                                                                                                                                                                                                                                                                                                                                                     |
| GRMZM2G102447    | -37  | No Description                                                                                                                                                                                                                                                                                                                                                                                                                                                                                                                                                                                                           |
| AC185261.4_FG002 | -12  | No Description                                                                                                                                                                                                                                                                                                                                                                                                                                                                                                                                                                                                           |
| GRMZM2G109070    | -154 | No Description                                                                                                                                                                                                                                                                                                                                                                                                                                                                                                                                                                                                           |
| GRMZM2G023798    | -19  | catalytic activity intramolecular transferase activity                                                                                                                                                                                                                                                                                                                                                                                                                                                                                                                                                                   |
| GRMZM2G041878    | -127 | No Description                                                                                                                                                                                                                                                                                                                                                                                                                                                                                                                                                                                                           |
| GRMZM2G105331    | -176 | No Description                                                                                                                                                                                                                                                                                                                                                                                                                                                                                                                                                                                                           |
| GRMZM2G138423    | -53  | transporter activity binding mitochondrial inner membrane transport membrane transmembrane transport                                                                                                                                                                                                                                                                                                                                                                                                                                                                                                                     |
| GRMZM2G039089    | -15  | protein folding heat shock protein binding unfolded protein binding                                                                                                                                                                                                                                                                                                                                                                                                                                                                                                                                                      |
| GRMZM2G101523    | -43  | zinc ion binding                                                                                                                                                                                                                                                                                                                                                                                                                                                                                                                                                                                                         |
| GRMZM2G079682    | -100 | beta-1,4-mannosylglycoprotein 4-beta-N-acetylglucosaminyltransferase activity protein amino acid N-linked glycosylation membrane                                                                                                                                                                                                                                                                                                                                                                                                                                                                                         |
| GRMZM2G128902    | -190 | No Description                                                                                                                                                                                                                                                                                                                                                                                                                                                                                                                                                                                                           |
| GRMZM2G0859330   | -33  | No Description                                                                                                                                                                                                                                                                                                                                                                                                                                                                                                                                                                                                           |
| GRMZM2G463711    | -90  | No Description                                                                                                                                                                                                                                                                                                                                                                                                                                                                                                                                                                                                           |
| GRMZM2G702126    | -41  | No Description                                                                                                                                                                                                                                                                                                                                                                                                                                                                                                                                                                                                           |
| GRMZM2G056762    | -40  | No Description                                                                                                                                                                                                                                                                                                                                                                                                                                                                                                                                                                                                           |
| GRMZM2G090419    | -25  | hydrolase activity                                                                                                                                                                                                                                                                                                                                                                                                                                                                                                                                                                                                       |
| GRMZM2G1330548   | -99  | No Description                                                                                                                                                                                                                                                                                                                                                                                                                                                                                                                                                                                                           |
| GRMZM2G072300    | -76  | heat shock protein binding                                                                                                                                                                                                                                                                                                                                                                                                                                                                                                                                                                                               |
| GRMZM2G086027    | -41  | No Description                                                                                                                                                                                                                                                                                                                                                                                                                                                                                                                                                                                                           |
| GRMZM2G119769    | -57  | homiothermy lice binding response to freezing                                                                                                                                                                                                                                                                                                                                                                                                                                                                                                                                                                            |
| GRMZM2G465769    | -150 | No Description                                                                                                                                                                                                                                                                                                                                                                                                                                                                                                                                                                                                           |
| GRMZM2G017869    | -80  | lipid metabolic process hydrolase activity, acting on ester bonds                                                                                                                                                                                                                                                                                                                                                                                                                                                                                                                                                        |
| GRMZM2G385818    | -163 | chromatin DNA binding RNA binding structural constituent of ribosome nucleus regulation of transcription, DNA-dependent translation                                                                                                                                                                                                                                                                                                                                                                                                                                                                                      |
| GRMZM2G076212    | -22  | protein kinase activity protein serine/threonine kinase activity ATP binding protein amino acid phosphorylation                                                                                                                                                                                                                                                                                                                                                                                                                                                                                                          |
| GRMZM2G081886    | -182 | phosphoglycerate dehydrogenase activity L-serine biosynthetic process potassium ion transport metabolic process cation transmembrane transporter activity amino acid binding oxidoreductase activity, acting on the CH-OH group of donors, NAD or NADP as acceptor cofactor binding NAD or NADH binding oxidation reduction                                                                                                                                                                                                                                                                                              |
| GRMZM2G055844    | -194 | protein kinase activity protein serine/threonine kinase activity protein binding ATP binding protein amino acid phosphorylation                                                                                                                                                                                                                                                                                                                                                                                                                                                                                          |
| GRMZM2G106010    | -99  | No Description                                                                                                                                                                                                                                                                                                                                                                                                                                                                                                                                                                                                           |
| GRMZM2G0825909   | -68  | No Description                                                                                                                                                                                                                                                                                                                                                                                                                                                                                                                                                                                                           |
| GRMZM2G039711    | -20  | No Description                                                                                                                                                                                                                                                                                                                                                                                                                                                                                                                                                                                                           |
| GRMZM2G178709    | -64  | No Description                                                                                                                                                                                                                                                                                                                                                                                                                                                                                                                                                                                                           |
| GRMZM2G147268    | -171 | cellular amino acid metabolic process biosynthetic process transferase activity, transferring nitrogenous groups lyase activity pyridoxal phosphate binding                                                                                                                                                                                                                                                                                                                                                                                                                                                              |
| GRMZM2G457697    | -52  | No Description                                                                                                                                                                                                                                                                                                                                                                                                                                                                                                                                                                                                           |
| GRMZM2G138770    | -104 | nucleotide binding ATP binding nucleoside-triphosphatase activity                                                                                                                                                                                                                                                                                                                                                                                                                                                                                                                                                        |
| GRMZM2G441748    | -118 | No Description                                                                                                                                                                                                                                                                                                                                                                                                                                                                                                                                                                                                           |
| GRMZM2G050925    | -19  | No Description                                                                                                                                                                                                                                                                                                                                                                                                                                                                                                                                                                                                           |
| GRMZM2G147685    | -56  | nucleus transcription regulator activity regulation of transcription                                                                                                                                                                                                                                                                                                                                                                                                                                                                                                                                                     |

|                  |      |                                                                                                                                                                                                                                                                           |
|------------------|------|---------------------------------------------------------------------------------------------------------------------------------------------------------------------------------------------------------------------------------------------------------------------------|
| GRMZM2G025042    | -66  | No Description                                                                                                                                                                                                                                                            |
| GRMZM2G509030    | -154 | No Description                                                                                                                                                                                                                                                            |
| GRMZM2G013357    | -99  | monooxygenase activity iron ion binding electron carrier activity heme binding oxidation reduction                                                                                                                                                                        |
| GRMZM2G178199    | -32  | No Description                                                                                                                                                                                                                                                            |
| GRMZM2G703185    | -70  | No Description                                                                                                                                                                                                                                                            |
| GRMZM2G145666    | -49  | structural constituent of cell wall                                                                                                                                                                                                                                       |
| GRMZM2G703193    | -31  | No Description                                                                                                                                                                                                                                                            |
| GRMZM2G180691    | -188 | hydrolase activity                                                                                                                                                                                                                                                        |
| GRMZM2G503606    | -138 | No Description                                                                                                                                                                                                                                                            |
| GRMZM2G066638    | -115 | motor activity ATP binding myosin complex                                                                                                                                                                                                                                 |
| GRMZM2G067756    | -39  | No Description                                                                                                                                                                                                                                                            |
| GRMZM2G146685    | -113 | No Description                                                                                                                                                                                                                                                            |
| GRMZM2G037574    | -8   | intracellular zinc ion binding                                                                                                                                                                                                                                            |
| GRMZM2G002053    | -27  | type I hypersensitivity homoiothermy lice binding response to freezing                                                                                                                                                                                                    |
| GRMZM2G015409    | -87  | protein binding zinc ion binding                                                                                                                                                                                                                                          |
| GRMZM2G379563    | -118 | No Description                                                                                                                                                                                                                                                            |
| GRMZM2G158629    | -163 | cysteine-type endopeptidase activity fatty acid synthase activity fatty acid synthase complex proteolysis fatty acid biosynthetic process metabolic process oxidoreductase activity oxidation reduction                                                                   |
| GRMZM2G703338    | -142 | No Description                                                                                                                                                                                                                                                            |
| GRMZM2G016106    | -12  | nucleic acid binding                                                                                                                                                                                                                                                      |
| AC219035.2 FG006 | -136 | No Description                                                                                                                                                                                                                                                            |
| GRMZM2G128771    | -29  | GTPase activity protein binding GTP binding intracellular intracellular protein transport nucleocytoplasmic transport signal transduction small GTPase mediated signal transduction protein transport                                                                     |
| GRMZM2G350773    | -12  | No Description                                                                                                                                                                                                                                                            |
| GRMZM2G103881    | -131 | No Description                                                                                                                                                                                                                                                            |
| GRMZM2G062019    | -134 | metabolic process hydrolase activity                                                                                                                                                                                                                                      |
| GRMZM2G062019    | -128 | metabolic process hydrolase activity                                                                                                                                                                                                                                      |
| GRMZM2G062019    | -122 | metabolic process hydrolase activity                                                                                                                                                                                                                                      |
| GRMZM2G062019    | -116 | metabolic process hydrolase activity                                                                                                                                                                                                                                      |
| GRMZM2G056329    | -82  | ATP binding                                                                                                                                                                                                                                                               |
| GRMZM2G022763    | -137 | nucleic acid binding RNA binding nucleus mRNA processing                                                                                                                                                                                                                  |
| GRMZM2G001388    | -63  | protein binding                                                                                                                                                                                                                                                           |
| GRMZM2G398758    | -68  | DNA binding                                                                                                                                                                                                                                                               |
| GRMZM2G345270    | -11  | sugar:hydrogen symporter activity transport phosphoenolpyruvate-dependent sugar phosphotransferase system                                                                                                                                                                 |
| GRMZM2G035482    | -61  | No Description                                                                                                                                                                                                                                                            |
| GRMZM2G308910    | -11  | DNA binding structural constituent of ribosome ligand-dependent nuclear receptor activity intracellular nucleus ribosome regulation of transcription, DNA-dependent translation                                                                                           |
| GRMZM2G390236    | -180 | No Description                                                                                                                                                                                                                                                            |
| GRMZM2G336879    | -21  | ribonucleoside-diphosphate reductase activity ribonucleoside-diphosphate reductase complex DNA replication                                                                                                                                                                |
| GRMZM2G336929    | -12  | transferase activity, transferring glycosyl groups                                                                                                                                                                                                                        |
| GRMZM2G013471    | -30  | No Description                                                                                                                                                                                                                                                            |
| GRMZM2G170307    | -31  | heat shock protein binding                                                                                                                                                                                                                                                |
| AC200904.3 FG003 | -42  | No Description                                                                                                                                                                                                                                                            |
| GRMZM2G013971    | -135 | ubiquitin ligase complex ubiquitin-protein ligase activity protein binding zinc ion binding protein ubiquitination                                                                                                                                                        |
| GRMZM2G046924    | -40  | transferase activity                                                                                                                                                                                                                                                      |
| GRMZM2G010384    | -151 | No Description                                                                                                                                                                                                                                                            |
| GRMZM2G081912    | -151 | ubiquitin ligase complex ubiquitin-protein ligase activity protein binding zinc ion binding protein ubiquitination                                                                                                                                                        |
| GRMZM2G701533    | -191 | No Description                                                                                                                                                                                                                                                            |
| GRMZM2G038356    | -71  | GTP binding intracellular intracellular protein transport small GTPase mediated signal transduction                                                                                                                                                                       |
| AC205833.3 FG002 | -52  | No Description                                                                                                                                                                                                                                                            |
| GRMZM2G457411    | -39  | protein binding zinc ion binding                                                                                                                                                                                                                                          |
| GRMZM2G053692    | -61  | structural molecule activity protein binding retrograde vesicle-mediated transport, Golgi to ER COPI vesicle coat                                                                                                                                                         |
| GRMZM2G138268    | -21  | nucleus regulation of transcription                                                                                                                                                                                                                                       |
| GRMZM2G366142    | -91  | No Description                                                                                                                                                                                                                                                            |
| GRMZM2G013016    | -109 | No Description                                                                                                                                                                                                                                                            |
| GRMZM2G053284    | -49  | protein binding ATP binding                                                                                                                                                                                                                                               |
| GRMZM2G177518    | -179 | No Description                                                                                                                                                                                                                                                            |
| GRMZM2G004314    | -184 | No Description                                                                                                                                                                                                                                                            |
| GRMZM2G065290    | -72  | transcription factor activity sequence-specific DNA binding regulation of transcription                                                                                                                                                                                   |
| GRMZM2G021704    | -17  | dihydroorotase activity hydrolase activity hydrolase activity, acting on carbon-nitrogen (but not peptide) bonds, in cyclic amides pyrimidine base biosynthetic process                                                                                                   |
| GRMZM2G039246    | -131 | two-component signal transduction system (phosphorelay) signal transducer activity                                                                                                                                                                                        |
| GRMZM2G702144    | -71  | No Description                                                                                                                                                                                                                                                            |
| GRMZM2G159724    | -17  | malic enzyme activity malate metabolic process oxidoreductase activity oxidoreductase activity, acting on the CH-OH group of donors, NAD or NADP as acceptor metal ion binding NAD or NADH binding oxidation reduction                                                    |
| GRMZM5G814782    | -186 | No Description                                                                                                                                                                                                                                                            |
| GRMZM5G814803    | -24  | No Description                                                                                                                                                                                                                                                            |
| AC155377.1 FG002 | -55  | aspartic-type endopeptidase activity proteolysis                                                                                                                                                                                                                          |
| GRMZM2G481362    | -119 | hydrolase activity                                                                                                                                                                                                                                                        |
| GRMZM2G467147    | -154 | protein binding defense response                                                                                                                                                                                                                                          |
| GRMZM2G066978    | -152 | No Description                                                                                                                                                                                                                                                            |
| GRMZM2G130173    | -117 | structural constituent of ribosome intracellular ribosome translation homoiothermy metal ion binding lice binding response to freezing                                                                                                                                    |
| GRMZM5G844094    | -138 | zinc ion binding                                                                                                                                                                                                                                                          |
| AC203768.3 FG005 | -153 | metalloendopeptidase activity proteolysis membrane                                                                                                                                                                                                                        |
| GRMZM2G027253    | -199 | DNA binding regulation of transcription, DNA-dependent                                                                                                                                                                                                                    |
| GRMZM2G119865    | -9   | DNA binding transcription factor activity structural constituent of ribosome intracellular ribosome regulation of transcription, DNA-dependent translation                                                                                                                |
| GRMZM2G169333    | -146 | nucleic acid binding damaged DNA binding DNA-(apurinic or apyrimidinic site) lyase activity DNA repair base-excision repair nucleotide-excision repair zinc ion binding oxidized purine base lesion DNA N-glycosylase activity hydrolase activity, hydrolyzing N-glycosyl |
| GRMZM2G076370    | -156 | electron carrier activity                                                                                                                                                                                                                                                 |
| GRMZM2G406413    | -140 | DNA binding DNA-directed RNA polymerase activity nucleus transcription                                                                                                                                                                                                    |
| GRMZM2G095404    | -63  | peroxidase activity response to oxidative stress heme binding oxidation reduction                                                                                                                                                                                         |
| AC18785.3 FG002  | -72  | No Description                                                                                                                                                                                                                                                            |
| GRMZM2G127080    | -181 | No Description                                                                                                                                                                                                                                                            |
| GRMZM2G061492    | -30  | cysteine-type endopeptidase activity protein binding proteolysis                                                                                                                                                                                                          |
| GRMZM2G358491    | -90  | No Description                                                                                                                                                                                                                                                            |
| GRMZM2G378167    | -60  | No Description                                                                                                                                                                                                                                                            |
| GRMZM2G047607    | -190 | No Description                                                                                                                                                                                                                                                            |
| GRMZM2G322220    | -196 | transporter activity oligopeptide transport membrane                                                                                                                                                                                                                      |
| GRMZM2G070075    | -141 | No Description                                                                                                                                                                                                                                                            |
| GRMZM2G371058    | -152 | DNA binding zinc ion binding regulation of transcription                                                                                                                                                                                                                  |
| GRMZM5G804893    | -123 | DNA binding intracellular nucleus regulation of transcription, DNA-dependent sequence-specific DNA binding                                                                                                                                                                |
| GRMZM2G039173    | -63  | membrane                                                                                                                                                                                                                                                                  |

|                  |      |                                                                                                                                                                                               |
|------------------|------|-----------------------------------------------------------------------------------------------------------------------------------------------------------------------------------------------|
| AC226373.2_FG009 | -124 | No Description                                                                                                                                                                                |
| GRMZM2G375904    | -14  | protein kinase activity protein serine/threonine kinase activity ATP binding protein amino acid phosphorylation                                                                               |
| GRMZM2G440452    | -73  | type I hypersensitivity                                                                                                                                                                       |
| GRMZM2G036837    | -125 | nucleic acid binding zinc ion binding                                                                                                                                                         |
| GRMZM2G017285    | -171 | catalytic activity 3-beta-hydroxy-delta5-steroid dehydrogenase activity steroid biosynthetic process biosynthetic process cellular metabolic process coenzyme binding                         |
| GRMZM2G056145    | -181 | nucleic acid binding zinc ion binding homolotherm ice binding response to freezing                                                                                                            |
| GRMZM2G473485    | -76  | No Description                                                                                                                                                                                |
| GRMZM2G11898     | -99  | No Description                                                                                                                                                                                |
| GRMZM2G450228    | -197 | No Description                                                                                                                                                                                |
| GRMZM2G107556    | -193 | No Description                                                                                                                                                                                |
| GRMZM2G477221    | -186 | binding                                                                                                                                                                                       |
| GRMZM2G035395    | -182 | binding                                                                                                                                                                                       |
| GRMZM2G389510    | -10  | No Description                                                                                                                                                                                |
| GRMZM2G372985    | -183 | No Description                                                                                                                                                                                |
| GRMZM5G860590    | -26  | No Description                                                                                                                                                                                |
| GRMZM2G154881    | -82  | hydrolase activity                                                                                                                                                                            |
| GRMZM2G078723    | -21  | No Description                                                                                                                                                                                |
| GRMZM2G142919    | -132 | tumor necrosis factor receptor binding immune response membrane transmembrane transport                                                                                                       |
| GRMZM2G334105    | -22  | No Description                                                                                                                                                                                |
| GRMZM2G447005    | -22  | No Description                                                                                                                                                                                |
| GRMZM2G700569    | -18  | No Description                                                                                                                                                                                |
| GRMZM2G349074    | -95  | No Description                                                                                                                                                                                |
| GRMZM2G303168    | -19  | No Description                                                                                                                                                                                |
| GRMZM5G856391    | -190 | No Description                                                                                                                                                                                |
| GRMZM2G139574    | -152 | transferase activity, transferring glycosyl groups                                                                                                                                            |
| GRMZM2G162868    | -151 | No Description                                                                                                                                                                                |
| GRMZM2G479869    | -95  | No Description                                                                                                                                                                                |
| GRMZM2G375222    | -171 | transcription elongation regulator activity membrane positive regulation of RNA elongation from RNA polymerase II promoter protein homooligomerization                                        |
| GRMZM2G141873    | -17  | No Description                                                                                                                                                                                |
| GRMZM2G456835    | -189 | response to stress                                                                                                                                                                            |
| GRMZM2G100146    | -197 | ossification intracellular cell adhesion zinc ion binding                                                                                                                                     |
| GRMZM2G361066    | -26  | nucleotide binding ATP-dependent peptidase activity serine-type endopeptidase activity ATP binding proteolysis membrane ATPase activity nucleoside-triphosphatase activity                    |
| GRMZM2G063672    | -121 | nucleotide binding ATP binding nucleoside-triphosphatase activity                                                                                                                             |
| GRMZM2G014066    | -167 | No Description                                                                                                                                                                                |
| GRMZM2G307756    | -75  | No Description                                                                                                                                                                                |
| GRMZM5G873546    | -88  | No Description                                                                                                                                                                                |
| GRMZM2G029292    | -189 | transcription factor activity sequence-specific DNA binding regulation of transcription                                                                                                       |
| GRMZM5G806622    | -108 | No Description                                                                                                                                                                                |
| GRMZM2G173868    | -198 | mannosyl-oligosaccharide 1,2-alpha-mannosidase activity calcium ion binding membrane                                                                                                          |
| GRMZM2G076450    | -82  | protein binding                                                                                                                                                                               |
| GRMZM2G116273    | -22  | No Description                                                                                                                                                                                |
| GRMZM2G110714    | -136 | catalytic activity tricarboxylic acid cycle phosphoenolpyruvate carboxylase activity carbon fixation                                                                                          |
| GRMZM2G420772    | -184 | No Description                                                                                                                                                                                |
| GRMZM2G555108    | -16  | No Description                                                                                                                                                                                |
| GRMZM2G012031    | -88  | protein binding                                                                                                                                                                               |
| GRMZM2G107408    | -163 | No Description                                                                                                                                                                                |
| GRMZM2G344323    | -161 | No Description                                                                                                                                                                                |
| GRMZM5G884407    | -18  | No Description                                                                                                                                                                                |
| GRMZM2G410033    | -189 | amino acid transport membrane                                                                                                                                                                 |
| GRMZM5G874483    | -165 | No Description                                                                                                                                                                                |
| GRMZM2G396540    | -17  | No Description                                                                                                                                                                                |
| GRMZM2G125175    | -185 | No Description                                                                                                                                                                                |
| GRMZM2G109299    | -158 | No Description                                                                                                                                                                                |
| GRMZM2G355631    | -102 | No Description                                                                                                                                                                                |
| GRMZM2G024615    | -66  | catalytic activity membrane                                                                                                                                                                   |
| GRMZM2G315431    | -63  | ubiquitin ligase complex ubiquitin-protein ligase activity binding protein ubiquitination                                                                                                     |
| GRMZM2G414813    | -30  | transporter activity transport membrane transmembrane transport                                                                                                                               |
| GRMZM2G339214    | -135 | No Description                                                                                                                                                                                |
| GRMZM2G146673    | -17  | protein folding heat shock protein binding unfolded protein binding                                                                                                                           |
| GRMZM2G307588    | -131 | DNA binding nucleus                                                                                                                                                                           |
| AC225790.2_FG003 | -86  | structural molecule activity cell adhesion actin cytoskeleton homolotherm ice binding response to freezing                                                                                    |
| GRMZM2G435015    | -164 | nucleus transcription regulator activity regulation of transcription                                                                                                                          |
| AC212732.4_FG005 | -175 | No Description                                                                                                                                                                                |
| AC191264.3_FG003 | -122 | No Description                                                                                                                                                                                |
| GRMZM2G150683    | -17  | extracellular region iron ion transport cellular iron ion homeostasis ferric iron binding                                                                                                     |
| GRMZM2G434696    | -180 | No Description                                                                                                                                                                                |
| GRMZM2G702283    | -41  | No Description                                                                                                                                                                                |
| GRMZM2G443939    | -33  | protein binding ATP binding apoptosis defense response                                                                                                                                        |
| GRMZM2G003625    | -52  | protein binding ATP binding apoptosis defense response                                                                                                                                        |
| GRMZM2G163550    | -184 | protein kinase activity ATP binding sugar binding protein amino acid phosphorylation recognition of pollen                                                                                    |
| GRMZM2G571844    | -121 | binding                                                                                                                                                                                       |
| AC203316.3_FG003 | -108 | No Description                                                                                                                                                                                |
| GRMZM2G142565    | -24  | No Description                                                                                                                                                                                |
| GRMZM2G420774    | -14  | nucleic acid binding                                                                                                                                                                          |
| GRMZM2G123644    | -141 | DNA binding RNA binding                                                                                                                                                                       |
| GRMZM2G109142    | -154 | No Description                                                                                                                                                                                |
| AC203570.4_FG005 | -186 | No Description                                                                                                                                                                                |
| GRMZM2G481009    | -28  | No Description                                                                                                                                                                                |
| GRMZM2G133233    | -81  | No Description                                                                                                                                                                                |
| GRMZM2G396049    | -54  | RNA binding RNA processing                                                                                                                                                                    |
| GRMZM2G396049    | -47  | RNA binding RNA processing                                                                                                                                                                    |
| GRMZM2G315885    | -53  | RNA binding RNA processing                                                                                                                                                                    |
| GRMZM2G025243    | -188 | alcohol dehydrogenase (NAD) activity metabolic process 2,3-dihydro-2,3-dihydroxybenzoate dehydrogenase activity enterobactin biosynthetic process oxidoreductase activity oxidation reduction |
| GRMZM5G896983    | -18  | No Description                                                                                                                                                                                |

**Supplementary table S6:** List of the 127 genes in the maize genome containing the 5 anthocyanin-related motifs predicted by Promzea

| maize ID         | GO annotation                                                     |
|------------------|-------------------------------------------------------------------|
| AC155377.1_FG001 | GO:0016459 GO:0005524 GO:0051015 GO:0003774                       |
| AC191692.3_FG001 |                                                                   |
| AC196161.3_FG002 |                                                                   |
| AC197340.3_FG004 |                                                                   |
| AC202534.2_FG007 |                                                                   |
| AC203972.3_FG001 | GO:0003735 GO:0006915 GO:0006412 GO:0005524 GO:0005840            |
| AC206030.4_FG001 | GO:0015297 GO:0016020 GO:0006855 GO:0015238                       |
| AC209810.3_FG002 | GO:0006508 GO:0004197                                             |
| AC211474.3_FG006 | GO:0003824 GO:0005488 GO:0008152                                  |
| AC217947.4_FG002 | GO:0016491 GO:0005506 GO:0010181 GO:0009055                       |
| GRMZM2G004188    | GO:0004518 GO:0005634 GO:0003677 GO:0006281                       |
| GRMZM2G005622    |                                                                   |
| GRMZM2G005753    | GO:0031072 GO:0006457 GO:0051082                                  |
| GRMZM2G011383    |                                                                   |
| GRMZM2G013016    |                                                                   |
| GRMZM2G016668    | GO:0008270 GO:0005515                                             |
| GRMZM2G018022    | GO:0016779 GO:0008152                                             |
| GRMZM2G018403    | GO:0003735 GO:0005840 GO:0006412 GO:0003723                       |
| GRMZM2G018631    | GO:0008270 GO:0005515                                             |
| GRMZM2G021051    | GO:0005506 GO:0016491                                             |
| GRMZM2G021243    |                                                                   |
| GRMZM2G021277    | GO:0006519 GO:0016831 GO:0019752 GO:0030170                       |
| GRMZM2G024674    |                                                                   |
| GRMZM2G025031    | GO:0004853 GO:0006779                                             |
| GRMZM2G026095    | GO:0016787 GO:0008270 GO:0008152                                  |
| GRMZM2G027241    |                                                                   |
| GRMZM2G027253    | GO:0006355 GO:0003677                                             |
| GRMZM2G027851    | GO:0006813 GO:0006885 GO:0008076 GO:0006814 GO:0005249 GO:0015385 |
| GRMZM2G028986    | GO:0020037                                                        |
| GRMZM2G031996    |                                                                   |
| GRMZM2G035749    | GO:0003735 GO:0016161 GO:0000272 GO:0006412 GO:0005840            |
| GRMZM2G036837    | GO:0008270 GO:0003676                                             |
| GRMZM2G038279    | GO:0006355 GO:0005634 GO:0000785 GO:0003677                       |
| GRMZM2G041388    |                                                                   |
| GRMZM2G043749    |                                                                   |

|               |                                                                                 |
|---------------|---------------------------------------------------------------------------------|
| GRMZM2G044348 | GO:0016021 GO:0004190                                                           |
| GRMZM2G047214 |                                                                                 |
| GRMZM2G047412 |                                                                                 |
| GRMZM2G050273 |                                                                                 |
| GRMZM2G055899 | GO:0009081 GO:0004084                                                           |
| GRMZM2G058630 | GO:0004607 GO:0006629                                                           |
| GRMZM2G062541 | GO:0005634 GO:0045449 GO:0030528                                                |
| GRMZM2G063961 | GO:0004674 GO:0006468 GO:0004713 GO:0005524                                     |
| GRMZM2G070279 | GO:0009239 GO:0005488 GO:0004022 GO:0008667                                     |
| GRMZM2G071745 | GO:0020037                                                                      |
| GRMZM2G074373 | GO:0043565 GO:0003700 GO:0016021 GO:0006355 GO:0046983 GO:0007186<br>GO:0005634 |
| GRMZM2G074462 | GO:0003824 GO:0005975 GO:0030246                                                |
| GRMZM2G074604 | GO:0005737 GO:0009058 GO:0016841 GO:0016211 GO:0006559                          |
| GRMZM2G074824 | GO:0003824                                                                      |
| GRMZM2G075366 |                                                                                 |
| GRMZM2G077696 |                                                                                 |
| GRMZM2G082037 | GO:0016758 GO:0008152                                                           |
| GRMZM2G083555 |                                                                                 |
| GRMZM2G085303 |                                                                                 |
| GRMZM2G085934 |                                                                                 |
| GRMZM2G088140 | GO:0005634 GO:0045449 GO:0006351 GO:0003677                                     |
| GRMZM2G094490 | GO:0004176 GO:0006508 GO:0016020 GO:0005524 GO:0004252                          |
| GRMZM2G095441 | GO:0005484 GO:0006886 GO:0016020 GO:0016192                                     |
| GRMZM2G099052 |                                                                                 |
| GRMZM2G100568 |                                                                                 |
| GRMZM2G104920 | GO:0008601 GO:0007165 GO:0000159                                                |
| GRMZM2G106604 |                                                                                 |
| GRMZM2G106650 | GO:0004497 GO:0020037 GO:0009055                                                |
| GRMZM2G107299 |                                                                                 |
| GRMZM2G109627 | GO:0045449 GO:0003677                                                           |
| GRMZM2G109680 |                                                                                 |
| GRMZM2G110145 | GO:0016020 GO:0016760 GO:0030244                                                |
| GRMZM2G113057 |                                                                                 |
| GRMZM2G113319 |                                                                                 |
| GRMZM2G115579 |                                                                                 |
| GRMZM2G115775 | GO:0016020 GO:0016192 GO:0005515                                                |
| GRMZM2G125216 |                                                                                 |
| GRMZM2G125448 | GO:0016747                                                                      |
| GRMZM2G129979 | GO:0005634                                                                      |

|               |                                                                                 |
|---------------|---------------------------------------------------------------------------------|
| GRMZM2G135095 | GO:0003735 GO:0006412 GO:0005840                                                |
| GRMZM2G142390 | GO:0004674 GO:0006468 GO:0004713 GO:0005524                                     |
| GRMZM2G143703 |                                                                                 |
| GRMZM2G146207 |                                                                                 |
| GRMZM2G146292 |                                                                                 |
| GRMZM2G147245 | GO:0004497 GO:0020037 GO:0009055                                                |
| GRMZM2G152370 |                                                                                 |
| GRMZM2G153536 | GO:0009081 GO:0004084                                                           |
| GRMZM2G163277 |                                                                                 |
| GRMZM2G163297 | GO:0003723                                                                      |
| GRMZM2G166719 | GO:0004674 GO:0006468 GO:0004713 GO:0005524                                     |
| GRMZM2G168675 |                                                                                 |
| GRMZM2G169584 | GO:0006915 GO:0005524                                                           |
| GRMZM2G170420 |                                                                                 |
| GRMZM2G176129 |                                                                                 |
| GRMZM2G176630 | GO:0006486 GO:0016020 GO:0005529 GO:0008378 GO:0042309 GO:0050826<br>GO:0050825 |
| GRMZM2G178278 | GO:0016192                                                                      |
| GRMZM2G312061 | GO:0004869                                                                      |
| GRMZM2G314593 |                                                                                 |
| GRMZM2G315862 |                                                                                 |
| GRMZM2G325008 | GO:0009987 GO:0005975 GO:0004553                                                |
| GRMZM2G325575 | GO:0008199 GO:0006879 GO:0016491                                                |
| GRMZM2G336879 | GO:0005971 GO:0004748 GO:0006260                                                |
| GRMZM2G347471 |                                                                                 |
| GRMZM2G348039 |                                                                                 |
| GRMZM2G352381 | GO:0016021 GO:0007186                                                           |
| GRMZM2G356718 | GO:0003824 GO:0003677                                                           |
| GRMZM2G361066 | GO:0004176 GO:0006508 GO:0016020 GO:0005524 GO:0004252                          |
| GRMZM2G366434 | GO:0003700 GO:0006355                                                           |
| GRMZM2G368827 |                                                                                 |
| GRMZM2G371030 |                                                                                 |
| GRMZM2G381709 | GO:0019787 GO:0043687 GO:0051246                                                |
| GRMZM2G394783 | GO:0004497 GO:0020037 GO:0009055                                                |
| GRMZM2G398758 | GO:0016021 GO:0007186 GO:0003677                                                |
| GRMZM2G402797 |                                                                                 |
| GRMZM2G405170 | GO:0006355 GO:0003677                                                           |
| GRMZM2G415579 | GO:0055114 GO:0016491                                                           |
| GRMZM2G422147 |                                                                                 |
| GRMZM2G428905 |                                                                                 |
| GRMZM2G432566 |                                                                                 |

|               |                                  |
|---------------|----------------------------------|
| GRMZM2G434839 | GO:0031072 GO:0006457 GO:0051082 |
| GRMZM2G459540 | GO:0008270 GO:0005622            |
| GRMZM2G459746 | GO:0003676                       |
| GRMZM2G465046 | GO:0006629 GO:0016788            |
| GRMZM2G472236 |                                  |
| GRMZM2G552418 |                                  |
| GRMZM5G820788 |                                  |
| GRMZM5G838435 |                                  |
| GRMZM5G861978 |                                  |
| GRMZM5G869587 |                                  |
| GRMZM5G871174 |                                  |
| GRMZM5G890241 |                                  |
| GRMZM5G894340 |                                  |
