# Supplementary material for: Promzea: a pipeline for discovery of co-regulatory motifs in maize and other plant species and its application to the anthocyanin and phlobaphene biosynthetic pathways and the Maize Development Atlas
Source: PubMed Central journal article supplement (PMC3658923; doi:10.1186/1471-2229-13-42), 2013-03-15
Supplement: 1471-2229-13-42-S5.pdf [file 1471-2229-13-42-S5.pdf]

>M95077.1\_PAL1

GTTCCCGCTGTACCGCTTCGTGCGCGAGGAGCTCGGCTGCGTGTTCCCTGACCGGCGAGAGGCTCAAGTCC  
CCCGGCGAGGAGTGCAACAAGGTGTTCTGTCGGCATCAGCCAGGGCAAGCTCGTGACCCCATGCTCGAGT  
GCCTCAAGGAGTGGGACGGCAAGCCGCTGCCATCAACGTCAAGTAAAGA

>BT042976.1\_C2

CCGGACTACTTCCGGATCACCAAGAGCGAGCACCTCACCGACCTCAAGGAGAAATTCAAGAGGATGT  
GCGACAAGTGCATGATCCGGAAGCGTTACATGCACCTGACGGAGGAGTTCCTGGCGGAGAACCCGAGCAT  
GTGCGCGTACATGGCGCCGTCGCTGGACGCGCGGCAGGACGTGGTGGTGGTGGAGGTGCCGAAGCTGGGG  
AAGGCGGCGGCGCAGAAGGCGATCAAGGAGTGGGGGCAGCCAAAGTCGCGGATCACGCACCTGGTGTCT  
GCACCACGTCCGGGGTGGACATGCCGGGCGCCGACTACCAGCTGACCAAGGCGCTGGGCCTGCGCCCTC  
CGTGAACCGCCTCATGATGTACCAGCAGGGGTGTTTCGCGGGCGGCACGGTGCTGCGCGTGGCCAAGGAC  
CTCGCGGAGAACAACCGCGGCGCGGGGTGCTGGTGGTGTGCTCCGAGATCACGGCCGTCACGTTCCGCG  
GCCCTCCGAGTCGCACCTCGACTCGCTCGTGGGCCAGGCGCTGTTTCGCGACGGCGCGGCCGCGTGGT  
CGTGGGCGCCGACCCGGACGACCGCGTCGAGCGCCGCTCTTCCAGCTCGTCTCCGCCGCCAGACCATC  
CTGCCGACTCGGAGGGCGCCATCGACGGCCACCTCCGCGGGGTGGGGCTCACCTTCCACCTGCTCAAGG  
ACGTGCCTGGCCTCATCTCCAAGAACATCGGCCGCGCGCTGGACGACGCGTTCAAGCCGCTCGGCATCTC  
CGACTGGAACCTCATCTTCTGGGTGGCGACCCCGCGGGCCCGCCATCCTCGACCAGGTGGAGGCCAAG  
GTCGGGCTGGACAAGGCCAGGATGCGCGCCACCCGCCACGTCTCTCCGAGTACGGCAACATGTCCAGCG  
CCTGCGTCTTCTCATCCTCGACGAGATGCGCAAGCGCTCCGCCGAGGACGGACAGGCCACCACGGGCGA  
GGCCTCGACTGGGGCGTCTCTTTCGGCTTCGGCCCGGACTCACCGTCGAGACCGTCTGTGCTCCACAGC  
GTCCCATACCCACCGAGCGGCCACCGCCTGATTCATCGATTCATCAACGATCAAATTCCTCCCCTCTC  
CGATCCAATTCGTCGTCGTCGTTTCGTCATTATTTTACGTCGTCCTCCGCAAATAATGTGCTCTCTGC  
TATAATTGTCGTGTAGTAGTAAGTAGCTGTTACTATTTTTCCATGTAAGTGCAGTCGCACAATCATCA  
TATATAATTAATATCTCTATATATGCATTT

>BT061979.1\_C2

CACACACAGCAGGCAGCAGCTCGATCGCTAGCTCCTCCGAACCGGAAAGCCAAGCCCGCTTTGGCGATCG  
TGCTTGCTTGCTTGGTTCCTTCAATTCCTGCCGAGCCAGCGAGAGCTAGCTGCTGCTGTCGCGTGGTAG  
ACGTCGCTTGGCAGCGAGAGCCTAGCTCGATCGGTCTCTCTGGTACAACGTAGGGAGAAAGATCGAGGG  
GGAGAGGACGACGACGATGGCCGGCGGACCGTGACCGTGGAGGAGGTGAGGAAGGCCAGCGCGCCACC  
GGCCCCGCCACCGTGTGGCGATCGGCACCGCCACGCCGCAACTGCGTGTACCAGGCCGACTACCCGG  
ACTACTACTTCCGGATCACCAAGAGCGAGCACCTCACCGACCTCAAGGAGAAATTCAAGAGGATGTGCGA  
CAAGTGCATGATCCGGAAGCGTTACATGCACCTGACGGAGGAGTTCCTGGCGGAGAACCCGAGCATGTGC  
GCGTACATGGCGCCGTCGCTGGACGCGCGGCAGGACGTGGTGGTGGTGGAGGTGCCGAAGCTGGGGAAGG  
CGGCGGCGCAGAAGGCGATCAAGGAGTGGGGGCAGCCAAAGTCGCGGATCACGCACCTGGTGTCTGCAC  
CACGTCCGGGGTGGACATGCCGGGCGCCGACTACCAGCTGACCAAGGCGCTGGGCCTGCGCCCTCCGTG  
AACCGCCTCATGATGTACCAGCAGGGGTGTTTCGCGGGCGGCACGGTGCTGCGCGTGGCCAAGGACCTCG  
CGGAGAACAACCGCGGCGCGGGGTGCTGGTGGTGTGCTCCGAGATCACGGCCGTCACGTTCCGCGGCC  
CTCCGAGTCGCACCTCGACTCGCTCGTGGGCCAGGCGCTGTTTCGCGACGGCGCGGCCGCGTGGTCTGTG  
GGCGCCGACCCGGACGACCGCGTCGAGCGCCCGCTCTTCCAGCTCGTCTCCGCCGCCAGACCATCCTGC  
CCGACTCGGAGGGCGCCATCGACGGCCACCTCCGCGAGGTGGGGCTCACCTTCCACCTGCTCAAGGACGT  
GCCTGGCCTCATCTCCAAGAACATCGGCCGCGCGCTGGACGACGCGTTCAAGCCGCTCGGCATCTCCGAC  
TGGAACCTCATCTTCTGGGTGGCGACCCCGCGGGCCCGCCATCCTCGACCAGGTGGAGGCCAAGGTGCG  
GGCTGGACAAGGCCAGGATGCGCGCCACCCGCCACGTCTCTCCGAGTACGGCAACATGTCCAGCGCCTG  
CGTCTCTTCTCATCCTCGACGAGATGCGCAAGCGCTCCGCCGAGGACGGACAGGCCACCACGGGCGAGGGC  
CTCGACTGGGGCGTCTCTTTCGGCTTCGGCCCGGACTCACCGTCGAGACCGTCTGTGCTCCACAGCGTCC  
CCATACCCACCGAGCGGCCACCGCCTGATTCATCGATTCATCAACGATCAAATTCCTCCCCTCTCCGAT  
CCAATTCGTCGTCGTCGTTTCGTCATTATTTTACGTCGTCCTCCGCAAATAATGTGCTCTCTGTATA  
ATTGTCGTGTAGTAGTAAGTAGCTGTTACTATTTTTCCATGTAAGTGCAGTCGCACAATCATCATATA

TAATTAATATCTCTATATATGCATTTTCATGCAAGACCAGGGTAGAGCTAGCTTGAGGAGAAGACCCTTAT  
CGTTGTCACTTTAGCATGCATGGGGTGGTGAGGTATTGGGTATACCTGTGTAAGACAAGCTTGGCTGGTT  
TAATTATATATTTTTTTTT

>NM\_001156113.1\_CI

AGCACGGGTACCTCGCCGGGAATCCCACCTCGCCAGTGCCGCCTCGCCGCTCTCCACATCGTGTCTC  
CGCCCCTTCGCACGGACGCACACGCACCTCACCTCTACAATTCCAAGCCCACCAGTCCACCACTCTCCG  
CTTCGCTTCTTGTGCTGCGTGC GGCGCGGGCCATGGTCTCCCTCCGCTTCCCTACCGCTGCAATCCCCCGCC  
TCCCGCCATCCCAGGCCCCCAACGGCGTGCATCGCCGCCACGGTGC CGCTGTAGCCGCGGGCCGAGC  
TGCAGTAGCGGCCAGCTTGACCCTCACGGGCAAGTCCACCGGCCGCCAGTCCCGCACCTGCCCTCTC  
TGGGCCTCCCTCTCCCTGGCCGACGCGGGCGGCCCCAGCTCCGTGCAACCCCGGACCGGGCGGACATTCC  
CCACCGAGGCCGCGCTTGGGCGCCGCTACTCGGCATAGGCCTCCGGAAGACCAGCGTCTCGGGCTCAA  
GTCCATCGACGTCTACGCATTGCGGTGTATGCGGATGACAACGATTTGAAGCAGCAGCTGAAGGAGAAG  
TACTCGAAGTTCTCGGTCTCGGAACTGAAGGGAAACGGTGAGCTGATCAACGATGCGCTAGAGCGTGACA  
TACCGATGACGGTCAGGCTGCAGATTGTTTATGGGAGGCTGAGTATTCGCTCGGTTTCGAGCGCATTTGA  
GAAGAGTGTGGGAAGTAGGCTTCAGAAGTTCCGGTGGACAAGACACCAAAGAGTTGCTTCAGAGTTTTGTT  
GCGGTTTTCAAGGATGAATACAAATTACCAAAGGGGTCTGTGATTGAGCTTTCGAGGGAATCTAACCATG  
TCCTTAAAATTTGCATTGAAGGCGAGGAAGTGGGGAGCATTAGAGCAAGCTTGTGCAAGTCTCTCTT  
AGATCTCTACATCGGAGATGACTCCTTGACGAAAATGCGAAAAGACGGCATCCATGAAAATATAGCTAGC  
ATTCTTAAAAGTTAAATGGGATGCTTAAGGAAGGTTACATGAACTGGGAGATTTTTTCAGGGAAGATATT  
TTTAATTCCAGCAATACCTCGACTGTGCCTAGTAAGTAGCGCACAAGTTTTTTTTTCAGTAGCGCGTGAGG  
AACTGAGGAAAAGGATAGATCCTTCCAAGTACAGCCTTTTTAAAAAAAAAAAAAAAAAAAA

>EU963832.1\_CI

AGCACGGGTACCTCGCCGGGAATCCCACCTCGCCAGTGCCGCCTCGCCGCTCTCCACATCGTGTCTC  
CGCCCCTTCGCACGGACGCACACGCACCTCACCTCTACAATTCCAAGCCCACCAGTCCACCACTCTCCG  
CTTCGCTTCTTGTGCTGCGTGC GGCGCGGGCCATGGTCTCCCTCCGCTTCCCTACCGCTGCAATCCCCCGCC  
TCCCGCCATCCCAGGCCCCCAACGGCGTGCATCGCCGCCACGGTGC CGCTGTAGCCGCGGGCCGAGC  
TGCAGTAGCGGCCAGCTTGACCCTCACGGGCAAGTCCACCGGCCGCCAGTCCCGCACCTGCCCTCTC  
TGGGCCTCCCTCTCCCTGGCCGACGCGGGCGGCCCCAGCTCCGTGCAACCCCGGACCGGGCGGACATTCC  
CCACCGAGGCCGCGCTTGGGCGCCGCTACTCGGCATAGGCCTCCGGAAGACCAGCGTCTCGGGCTCAA  
GTCCATCGACGTCTACGCATTGCGGTGTATGCGGATGACAACGATTTGAAGCAGCAGCTGAAGGAGAAG  
TACTCGAAGTTCTCGGTCTCGGAACTGAAGGGAAACGGTGAGCTGATCAACGATGCGCTAGAGCGTGACA  
TACCGATGACGGTCAGGCTGCAGATTGTTTATGGGAGGCTGAGTATTCGCTCGGTTTCGAGCGCATTTGA  
GAAGAGTGTGGGAAGTAGGCTTCAGAAGTTCCGGTGGACAAGACACCAAAGAGTTGCTTCAGAGTTTTGTT  
GCGGTTTTCAAGGATGAATACAAATTACCAAAGGGGTCTGTGATTGAGCTTTCGAGGGAATCTAACCATG  
TCCTTAAAATTTGCATTGAAGGCGAGGAAGTGGGGAGCATTAGAGCAAGCTTGTGCAAGTCTCTCTT  
AGATCTCTACATCGGAGATGACTCCTTGACGAAAATGCGAAAAGACGGCATCCATGAAAATATAGCTAGC  
ATTCTTAAAAGTTAAATGGGATGCTTAAGGAAGGTTACATGAACTGGGAGATTTTTTCAGGGAAGATATT  
TTTAATTCCAGCAATACCTCGACTGTGCCTAGTAAGTAGCGCACAAGTTTTTTTTTCAGTAGCGCGTGAGG  
AACTGAGGAAAAGGATAGATCCTTCCAAGTACAGCCTTTTTAAAAAAAAAAAAAAAAAAAA

>NM\_00112225.1\_f3h

AGAAGCAGCATCACGATCCCGGCCCGCGGCCCGTACGTCGACGAGGAGGAGGAGGACGTACGTACGCAG  
AGCAGCTGCTGGCACCATGGCTCCCGTGAGCATCAGCGCTGTTCCGTTCTCCCGACGGCGGGAGGGG  
GAGACGAACGTGCGCGCTCGTTCGTGCGGAGGAGGACGAGCGCCCAAGGTGCCGCACGACCGCTTCA  
GCGACGAGGTGCCGGTGGTGTGCTCGAGGGCATCGACGGGCCGCGAGGCGGGCCGAGATCCGCGGCCG  
CGTGCCCGCGCCTGCGAGGACTGGGGCATCTTCCAGGTGGTGGACCACGGCGTGGACGCCGCGCTCGTG  
GCCGACATGGCGCGCTCGCCGAGACTTCTTCGCGCTCCCGCCGAGGACAAGCTCCGCTTCGACATGT  
CCGGCGGGAAGAAGGGCGGCTTATCGTCTCCAGCCACCTCCAGGGGGAGGCGGTGCAGGACTGGCGTGA  
GATCGTGACCTACTTCTCGTACCCGGTGAAGGCCCGGCGACTACTCCCGGTGGCCGGACAAGCCGGCGGGC

TGGCGGGCGGTGGTGGAGCGGTACAGCGAGCAGCTGATGGCGCTGGCGTGCAGGCTCCTGGGCGTGCTCT  
CCGAGGCCATGGGCTGGACACGGAGGCGCTGGCCAGGGCCTGCGTGGACATGGACCAGAAGGTGGTGGT  
CAACTTCTACCCGAGGTGCCCGAGCCGGACCTCACGCTGGGGCTCAAGCGCCACACCGACCCCGGCACC  
ATCACGCTGCTGCTGCAGGACCTGGTCGGCGGCCTCCAGGCCACGCGCGACGGCGGCCGACCTGGATCA  
CCGTGCAGCCCGTGGAGGGCGCCTTCGTGCTCAACCTCGGCGACCACGGCCACCTCCTGAGCAACGGCAG  
GTTCAAGAACGCGGACCACCAGGCGGTGGTGAACCTCGGAGTGCAGCCGCTGTCCATCGCCACGTTCCAG  
AACCCGGCGCCCGACGCGACGGTGTACCCGCTGGCCGTGCGCGACGGGGAGGCGCCATACTGGACCATC  
CCATCACCTTCGCGGAGATGTACCGCCGCAAGATGGCCCGGACATCGAGCTCGCCAGGCTCAAGAAGCA  
GGCCAAGGCCGACAAGAAGCAGCAGCAGAGTGCCAACAAGGAGTTCGCCGACTCCAAGCCTCTCGAC  
GCCATTTTTGCCTGATATGGTAGAGGGCGCGGACTACCGATCCGTTGTTATTGCTGCGTGTGATTAATT  
TTCATCTATAAGAACATAGCTACGTGCGACCGCGCTGTGGTGATTAATTAAGGTCTGAATAAAATAATG  
GCTGCACAAAAGTAGGAAGCGATCGATCACCCAGATAAATGTATGTGCGTTCCTTTTCTTTCAAGA  
TGTGTAATTTTCAACGTGCGGTTCCAGATGCATGGACTGGACTGGACCGGAGTGCATTGTAATTTTGG  
TTTCCCCTGTTGAATATGCGAGAGGTGTGCATGTCTTTGTATGAAAAAAAAA

>BT034095.1\_a1

CAAAGCAAGTGTCTGCTCACTCAGTCCTGCGCAAGAGCTCGTCTCGGAGAAAAAACCGGGAGGGCGAT  
AATGGAGGGAGGTGCCGGTGCAGCGAGAAAGGGAAGGTGCTGGTACGGGGGCGTCCGGCTTCGTGCGC  
TCTGGCTCGTCATGAAGCTCCTCCAGGCCGGCTACACCGTCCGGGCGACCGTGCAGGATCCCGCAACG  
TTGGGAAGACGAAGCCATTGATGGACCTCCCGGAGCAACGGAGCGCCTGTCCATATGGAAAGCCGACCT  
GGCGGAGGAAGGCAGCTTCCACGACGCCATCAGGGGCTGCACCGGCGTCTTCCACGTCGCCACGCCATG  
GACTTCTGTCCAAAGACCCTGAGAATGAGGTAATCAAGCCGACGGTGAAGGGATGATAAGCATCATGC  
GGGCATGCAAGGAGGCCGGCACCGTGCAGCGCATCGTCTTCACTTCTCCGCCGGACGGTCAACCTGGA  
GGAGCGGCAGAGGCCCGTACGACGAGGAAAGCTGGACCGACGTCGACTTCTGCCGTGCGTCAAGATG  
ACCGGATGGATGTACTTCTGTCTAAAACCCTGGCGGAGAAGGCGGCCCTGGCGTACGCGGGGAGCACG  
GCCTGGACCTGGTACCATCATCCCGACGCTCGTGGTGGCCCGTTCATCAGCGGTCCATGCCGCCAG  
CCTCATACCGCGCTGGCGCTCATCACGGGGAACGCGCCCACTACTCGATCCTCAAGCAGGTGCAGCTC  
ATCCACCTCGACGACCTCTGCGACGCCGAGATCTTCTTTCGAGAACCCGGCCGCGGCCGGGCGCTACG  
TCTGCTCCTCGACGACGTACCATCCACGGCCTCGCCGCATGCTCAGGGATAGGTACCCGAGTACGA  
CGTCCCGCAGAGGTTCCCGGGATCCAGGACGACCTCCAGCCGGTGCCTTCTCGTCCAAGAAGCTCCAG  
GACCTCGGGTTACCTTCAGGTACAAGACGCTGGAGGACATGTTTCGACGCCGCATCCGGACTTGCCAGG  
AGAAGGGCCTCATCCCCCTGCCACTGCCGCCGAGGGGACGGCTTTGCCTCGGTGCGCGCACCCGGCGA  
GACGGAGGCGACGATTGGCGCTTAAGCAACAATCACCCGGCTCTCCCCGTCGATGATGCTATCAGCTATC  
TATCTCTTCGAGCTCCGCTGCCAATACGGAACCTTACTTCCATGTTCAACGAATTGTTTTATCCCCTGGAT  
TAGTATTGTTTTATGTTTTATACCCAAACAACGAATGTTTCTCAGTATTTTACTACAGCTAGCCCCTA  
TAGTAGAGATTCTATTATATGAATAAGCTATCTGTAGAGGCTCTGGTGCAATAT

>BT043174.1\_a1

GCAAGTGTCTGCTCACTCAGTCCTGCGCAAGAGCTCGTCTCGGAGAAAAAACCGGGAGGGCGATAATG  
GAGGGAGGTGCCGGTGCAGCGAGAAAGGGAAGGTGCTGGTACGGGGGCGTCCGGCTTCGTGCGCTCCT  
GGCTCGTCATGAAGCTCCTCCAGGCCGGCTACACCGTCCGGGCGACCGTGCAGGATCCCGCAACGTTGG  
GAAGACGAAGCCATTGATGGACCTCCCGGAGCAACGGAGCGCCTGTCCATATGGAAAGCCGACCTGGCG  
GAGGAAGGCAGCTTCCACGACGCCATCAGGGGCTGCACCGGCGTCTTCCACGTCGCCACGCCATGGACT  
TCCTGTCCAAAGACCCTGAGAATGAGGTAATCAAGCCGACGGTGAAGGGATGATAAGCATCATGCGGGC  
ATGCAAGGAGGCCGGCACCGTGCAGCGCATCGTCTTCACTTCTCCGCCGGGACGGTCAACCTGGAGGAG  
CGGCAGAGGCCCGTCTACGACGAGGAAAGCTGGACCGACGTCGACTTCTGCCGTGCGTCAAGATGACCG  
GATGGATGTACTTCTGTCTAAAACCCTGGCGGAGAAGGCGGCCCTGGCGTACGCGGGGAGCACGGCCT  
GGACCTGGTACCATCATCCCGACGCTCGTGGTGGCCCGTTCATCAGCGGTCCATGCCGCCAGCCTC  
ATCACCGCGCTGGCGCTCATCACGGGGAACGCGCCCACTACTCGATCCTCAAGCAGGTGCAGCTCATCC  
ACCTCGACGACCTCTGCGACGCCGAGATCTTCTTTCGAGAACCCGGCCGCGGCCGGGCGCTACGCTG

CTCCTCGCACGACGTCACCATCCACGGCCTCGCCGCCATGCTCAGGGATAGGTACCCCGAGTACGACGTC  
CCGCAGAGGTTCCCCGGGATCCAGGACGACCTCCAGCCGGTGCCTTCTCGTCCAAGAAGCTCCAGGACC  
TCGGGTTACCTTCAGGTACAAGACGCTGGAGGACATGTTGACGCCGCCATCCGGACTTGCCAGGAGAA  
GGCCTCATCCCCCTGCCACTGCCGCCGAGGGGACGGCTTTGCCTCGGTGCGCGCACCCGGCGAGACG  
GAGGCGACGATTGGCGCTTAAGCAACAATCACCCGGCTCTCCCCGTCGATGATGCTATCAGCTATCTATC  
TCTTCGAGCTCCGCTGCCAATACGGAACCTACTTCCATGTTCAACGAATTGTTTTATCCCCTGGATTACG  
TATTGTTTTATGTTTTATACCCAAACAACGAATGTTTCTCAGTATTTTACTACAGCTAGCCCCTATAGT  
AGAGATTCTATTATATGAATAAGCTATCTGTAGAGGCTCTGGTGCAATATATATTTTCGAGTTATTTGGAT  
TACTAGCATAATTCAATTTTT

>BT067630.1\_a1

GTGTCTGCTCACTCAGTCTGCGCAAGAGCTCGCTCTCGGAGAAAAAACGCGGGAGGCGATAATGGAGG  
GAGGTGCCGGTGCAGAGCGAGAAAGGGAAGGTGCTGGTCACGGGGGCGTCGGGCTTCGTCGGCTCCTGGCT  
CGTCATGAAGCTCCTCCAGGCCGGCTACACCGTCCGGGCGACCGTGC GCGATCCC GCGAACGTTGGGAAG  
ACGAAGCCATTGATGGACCTTCCGGAGCAACGGAGCGCCTGTCCATATGGAAAGCCGACCTGGCGGAGG  
AAGGCAGCTTCCACGACGCCATCAGGGGCTGCACCGGCGTCTTCCACGTCGCCACGCCCATGGACTTCT  
GTCCAAAGACCCTGAGAATGAGGTAATCAAGCCGACGGTGGAAAGGGATGATAAGCATCATGCGGGCATGC  
AAGGAGGCCGGCACCGTGC GCGCATCGTCTTCACTTCTCCGCCGGGACGGTCAACCTGGAGGAGCGGC  
AGAGGCCCGTCTACGACGAGGAAAGCTGGACCGACGTCGACTTCTGCCGTGCGTCAAGATGACCGGATG  
GATGTACTTCGTGTCTAAAACCTGGCGGAGAAGGCGGCCCTGGCGTACGCGGCGGAGCACGGCCTGGAC  
CTGGTCACCATCATCCCGACGCTCGTGGTGGCCCGTTCATCAGCGCGTCCATGCCGCCAGCCTCATCA  
CCGCGTGGCGCTCATCACGGGGAACGCGCCCCACTACTCGATCCTCAAGCAGGTGCAGCTCATCCACCT  
CGACGACCTTGCAGCGCCGAGATCTTCTTTCGAGAACCCGGCCGCGGCCGGGCGCTACGTCTGTCTCC  
TCGCACGACGTCACCATCCACGGCCTCGCCGCCATGCTCAGGGATAGGTACCCCGAGTACGACGTCCCGC  
AGAGGTTCCCCGGGATCCAGGACGACCTCCAGCCGGTGCCTTCTCGTCCAAGAAGCTCCAGGACCTCGG  
GTTACCTTCAGGTACAAGACGCTGGAGGACATGTTGACGCCGCCATCCGGACTTGCCAGGAGAAGGGC  
CTCATCCCCCTGCCACTGCCGCCGAGGGGACGGCTTTGCCTCGGTGCGCGCACCCGGCGAGACGGAGG  
CGACGATTGGCGCTTAAGCAACAATCACCCGGCTCTCCCCGTCGATGATGCTATCAGCTATCTATCTTT  
CGAGCTCCGCTGCCAATACGGAACCTACTTCCATGTTCAACGAATTGTTTTATCCCCTGGATTACGTATT  
GTTTTATGTTTTATACCCAAACAACGAATGTTTCTCAGTATTTTACTACAGCTAGCCCCTATAGTAGAG  
ATTCTATTATATGAATAAGCTATCTGTAGAGGCTCTGGTGCAATATATATTTTCGAGTTATTTGGATT

>NM\_001112604.1\_anthocyaninless2\_a2

ATATTTAAAAAATCAATATTTGTTTGTATGAGTGTTTGATGAGTATATTGTACCTCTTGAACTGAA  
GCACACGATTAATTCTTTGTTAAAGAATGCCATGATAATAGTTTGCTATAAATGAAATTAATGTTAAATC  
AATTTGTTAAAAATTATGGTTTCTTCTGAATTTAGTTATTGCCGATAGAGAAAAAACATTGAAAAAATAT  
TTAGATCATATACGGCTGAATTTAGTTATTGATGATCTTATTTGTTATATTTTATTTGTTTGAGGAATAC  
ACGCTTATTTTACTTACCCTGTTTGTACTTTAGTCACTAGATTAACCTTTAGTTAATCGCTAAAGTA  
CCTCGTTGGTTTCAGTGACTAAACCAGACTAAAGAGCATTAAATTGATGTAATAATGACTATGTTGTCCA  
TATTAATTAGTGGATATTTGCTGCAAAAAGAAAGTGAAGAGGGCAAATAAGGTAAAAATCCTACTTTAAT  
CCCTTTTAGCCATCCCTTGGTGACTAAAGAATTAAGTTTAGTCACAACACTTTAGTCACCATATTTAAT  
TCTTTAGGGACTAAAAGTGACTAACTTTAGTCACCCCAAACCTAAACGGTACCTTAGATCTATTTATTTG  
AGGAATGCAAGTGTTTGAATAACTATTCTATTTAAATAAGATCTACCTAACGACGTACGGACATCTAACT  
AGTATAGAATTAACGTACACATGTATTGATTTGAGTGACCCATGGCTGATTCCAGTGATCAACAATAATC  
CTGCCAAGCATCAAGCTAATCCAAGGTGCCACGGAATGGTCTCGCCCGCCGCGCTGGCCACATATAACC  
AGCAGGTGACCGTCGGATTGGGTGGCGCTTGGCACGGAAAAAATTTGGTGCAGCACTGCTGCAAAACCAG  
AGTGTTTGCAGCCCTCACAAAAGGAGGATAGACCCACCTGCAGGTCCAGCAGATAACGTTTTAGTT  
GTATTATTGTTGCTGCGGGTGGGGTCTATCCTCTTTTTGTGAGGGGCTGCAAACTCTGGTTTGCAGC  
AGTGCTGCACCAATTTTTTCCCTTGGCACGTGTTCCGGTGGTAGCTGGCTCCTCCATGCAATGCCTAT  
GCCTGTCGTCGCGATCGCAACCACCAGTCAAGACGAATGGCAGGCAGCTAAGTAGCTAACAAACAACAGGC

TTGATTGTATGTACAGCAATATATATACATCTCGAGAAGCTCCTAGCAGAGATGCATCCATCTCGACGA  
CGATCCATCCATCTTAAAGCAAGCAGAGACATGGAGTCGTCGCCGCTGCTGCAGCTGCCGGCGGCACGCG  
TGGAGGCTCTGAGCCTCAGCGGCTCTCCGCCATCCCGCCGAGTACGTCCGCCCCGCCGACGAGCGAGC  
CGCCTCGGGGATGCCTTCGACCTGGCGCGCACCCATGCCAACGACCACACCGCGCCGAGGATCCCCGTC  
GTCGACATCTCCCGTTCTCGACAGCAGCAGCCAGCAGCAGCAGCGGGACGAATGCGTGGAGGCCGTGC  
GTGCCGCCGCCGCGACTGGGGCGTCATGCACATCGCCGGCCACGGCATCCCCGCCGAGCTCATGGACCG  
CCTGCGCGCCGACGGAACCGCTTCTTCGCCCTCCCCGTCCAGGACAAGGAGGCCTACGCCAACGACCCC  
GCCGCCGGCCGCTGCAGGGCTACGGCAGCCGCTCGCCACCAACACCTGCGGGCAGCGCGAGTGGGAGG  
ACTACCTCTTCCACCTTGTGCACCCCGACGGGCTCGCCGACCACGCGCTCTGGCCTGCGTACCCGCCGA  
CTACATCGCCGCCACCCGCGACTTCGGCCGCCGAACGCGGGACCTGGCCTCCACGCTGCTCGCCATCCTC  
TCCATGGGCCTCCTTGGCACAGACCGTGGCGACGCGCTAGAGAAGGCGCTCACCACCACCACCAGGA  
CAGCAGCTGACGACGACCTCCTCCTGCAGCTCAAGATCAACTACTACCCGAGGTGCCCGCAGCCGGAGCT  
GGCCGTCGGCGTGGAGGCCACACGGACGTACGCGCCTCTCCTTCATCCTCACAACGGCGTGGCCGGC  
CTGCAGGTGCTCCACGGCGCCCGCTGGGTGACGGCGCGCCACGAGCCGGGCACCATCATCGTCCACGTGG  
GGGACGCCCTGGAGATCCTCAGCAACGGCCGCTACACCAGCGTCTCCACCGCGGCCCTCGTCAACGGGA  
GGCCGTGCGCATCTCCTGGGTGCTTCTGCGAGCCGCCACCAGACTCCGTGCTGCTGCACCCGCTGCCG  
GAGCTTGTACGGAAGGCCACCCCGCAAGTTACGCCGCGCACATTCAAGCAGCACCTGGATCGCAAGC  
TTTTCAAGAAGAAACAGCAGCACAAGCAAAGCAGAGGAAGAGGATGGCGGCAATGGTGACCACCACCG  
CCACGAGCCGCCGCCGAGACCAACTGATGGGCTGCACATGTCTTCCATCCGCCACGCATATCTTCTC  
TCGCGAAATTAATAAGGATCCATCAGCATTTTCCATATATTATATTAGTTTCATGCTCCTACGTTACTA  
CGAGAAAAAATAGTATCTATGATATATAGAATCCATGTGTTAAAATATCACTGTAACACTAATATTAT  
ATATGTTGTTACGAAATCAATATAATAAAATAAATTGATATACCAAAACACTAATTATTATTCTATAGTT  
TTGTTAGAGTAACTAAAAGTTAAGATTTATATACTTTAAAAGATATATAAGATTGTACCATCACTAGTAA  
AAAATAACAATACCAATATTTTATAAATATGAGTAT

>DQ335126.1\_Bz1

ATCGCATTGCGATCGCATCGCAGGTGCGATCCGACGCTAGCGGCTAGCCTAGCCGAACAGCCTGAGCGCG  
CGAAGATGGCGCCCCGCCGACGGCGAGTCTCCCCGCCGCCGACGTGGCCGTGGTGCCTTCCCGTTACG  
CTCCCACGCGGCGGTGCTGCTCTCCATCGCGCGGCCCTGGCTGCCGCCGCGGCCGCTCCGGGGCCACG  
CTCTCGTTCTCTCCACCGCTCCTCCCTCGCGCAGCTCCGCAAGGCCAGCAGCGCCTCCGCCGGGCACG  
GGTCCCCGGGGAACCTGCGCTTCGTGAGGTACCGGACGGCGCGCCCGCGGCCGAGGAGACCGTGCCGGT  
GCCGCGGCAGATGCAGCTGTTTCATGGAGGCCGCGGAGGCCGGCGGGGTGAAGGCCTGGCTGGAGGCGGCC  
CGCGCCGCGGGCGGGCGGCCAGGGTGACCTGCGTGGTGGGCGACGCGTTCGTGTGGCCGGCGGCCGAGC  
CGGCCGCTCCGCCGGGGCGCCGTGGGTGCCGGTGTGGACGGCCGCGTCTGCGCGCTCCTGGCGCAT  
CCGACCGACGCGCTCCGGGAGGACGTTGGCGACCAGGCAGCAAACAGGGTGGACGGGCTACTGATCTCC  
CACCCGGGCTCGCCAGCTACCGCGTCCGTGACCTCCAGACGGCGTCTGCTCCGGCGACTTCAACTACG  
TCATCAACCTCCTCGTCCACCGCATGGGGCAGTGCCTCCCGCGCTCTGCCGCCGCGTGGCACTCAACAC  
GTTCCAGGCCTGGACCCGCCGACGTCACCGCGGCGCTCGCGGAGATCCTGCCCAACTGCGTCCCGTTC  
GGCCCTACCACCTCCTCCTCGCCGAGGACGACGCCGACACCGCCGACCAGCCGACCCGCACGGCTGCC  
TCGCTGGTGGGCCGCAACCCGCGCGCGGCGTGCCTACGCTTCGGCACGGTGGCGTGCCTCCGCG  
GCCGACGAGCTCCGCGAGCTGGCGGCCGGGCTGGAGGACTCGGGCGCGCCGTTCTGTGGTGCCTGCGC  
GAGGACTCGTGGCCGACCTCCCGCCGGTTTCTGGACCGCGCCGCGGGCACCGGGTCCGGGCTCGTGG  
TGCCCTGGGCGCCGAGGTGGCCGTGCTGCGCCACCTTCCGTGGGCGCGTTCGTGACGCACGCCGGGTG  
GGCGTGGTGTGGAGGGCTTGTCCAGCGGGGTGCCCATGGCGTGCCGCCCTTCTTCGGCGACCAGCGG  
ATGAACGCGCGGTCCGTGGCGCACGTGTGGGGTTTCGGCGCCGCGTTCGAGGGCGCTATGACGAGCGCCG  
GAGTGGCCACGGCCGTGGAGGAGCTGCTGCGCGGGGAGGAAGGGGCGCGGATGAGGGCAAGGGCCAAGGA  
GCTGCAGGCCTTGGTGGCCGAGGCGTTCGGGCCAGGCGGTGAGTGCAGGAAGAACTTCGACAGGTTCTGC  
GAGATAGTCTGTCGCGCGTGAAGGTCGTCTTGTGTTTCAGAGTTTTACCAACAGAAGAACAATGAA  
TTGGATGGCATGCTACGTCGATTCTTTTTTTGTTGATCCCTGAGTTGATACATTTTGTACTTGATAC

ATGAGTTGCAGCAGCAGCAGCAACAGCCTTCTGTACCTTGGCTTTGGATCTGTATTCTTGTCACCAGTTA  
TCTGAAAGCATCAATAACCTTCTGTCTTCTAAAAAAAAAAAAAAAAAAAA

>AF377543.1\_B73z2

ACAGGCTCCTCGCTGCCAACCCCGTCTACGGGAAGATCCCCGTGCTGCTCCTCCCCGACGGCCGCGCCAT  
ATGCGAGTCCGCAGTCATCATCCAGTGCATCGAGGACGTGGCGCGTGGAAGCGGCGGCGCCGAGGCTAGC  
AGCCTGCTGCTGCCGGACGACCCCTACGAGCGCGCCATGCACCGCTTCTGGACCGCCTTCATCGACGACA  
AGGTGAGCACCGAGCAGAGCACGGCAGCAAGTGTCTTTTCTTCAAGGTAACGTGCAACAACTGCCGTGC  
CTTTCTGCAGTTTTGGCCGGCGCTGGATGCCGTCTCCCTGGCGCCGACCCCGGAGCACGCGCGCAGGCC  
GTGGAAGACACCCGCGCCGCGCTGAGCCTCCTGGAGGTGGCGTTCAAGGACCGCAGCAACGGCAGGGCTT  
TCTTCTCCGGTGGCGACGCCGCGCCAGGCCTCCTGGACCTGGCCCTCGGATGCTTCTGCCGGCGCTCAG  
GGCCTGCGAACGGCTCCACGGCCTCTCACTCATCGACGCTCCGCGACGCCGCTGCTGGACGGGTGGAGC  
CAGCGCTTCGCCGCGCACCCCTGCAGCCAAGCGCGTCTGCCGACA
