# Supplementary material for: Promzea: a pipeline for discovery of co-regulatory motifs in maize and other plant species and its application to the anthocyanin and phlobaphene biosynthetic pathways and the Maize Development Atlas
Source: PubMed Central journal article supplement (PMC3658923; doi:10.1186/1471-2229-13-42), 2013-03-15
Supplement: 1471-2229-13-42-S6.pdf [file 1471-2229-13-42-S6.pdf]

[Home](#)

## Results Summary

./input/anthocyanin\_pathway.fas

Promzea - 00000496

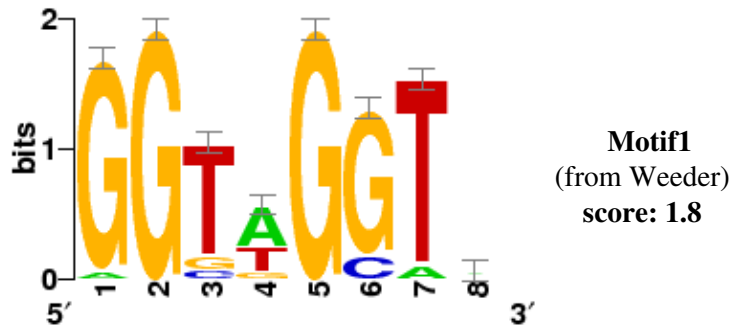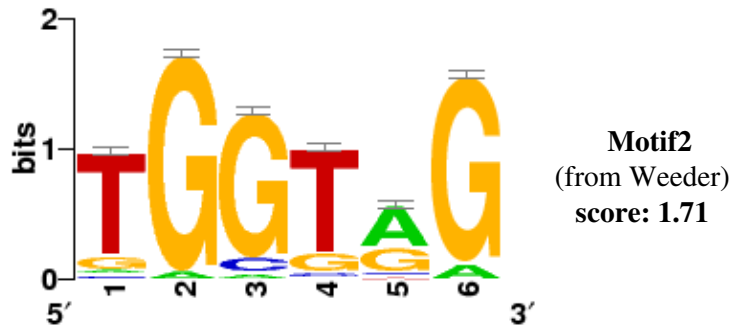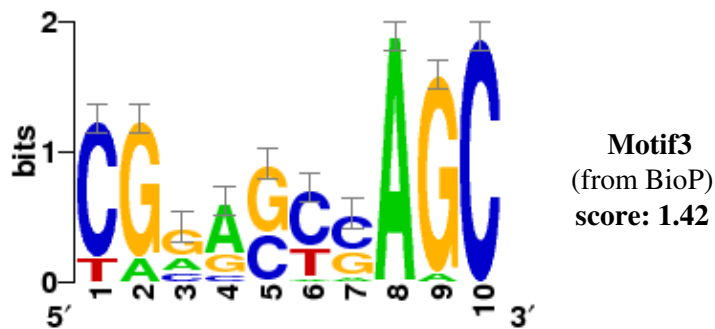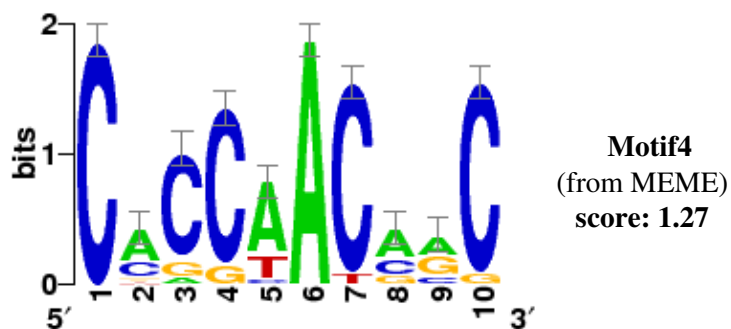

results - 00000496

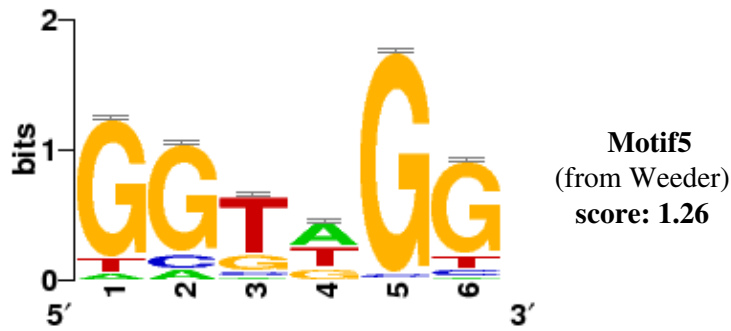

Compare your motifs to known promoter motif databases using STAMP website [motif file to copy in STAMP website](#)

Open the above link, copy content of the newly open file and paste in STAMP program link below In STAMP, under "Similarity Matching", we suggest selecting the plant motif databases: Athamap, AGRIS, PLACE, TRANSFAC; then submit

[STAMP website](#)

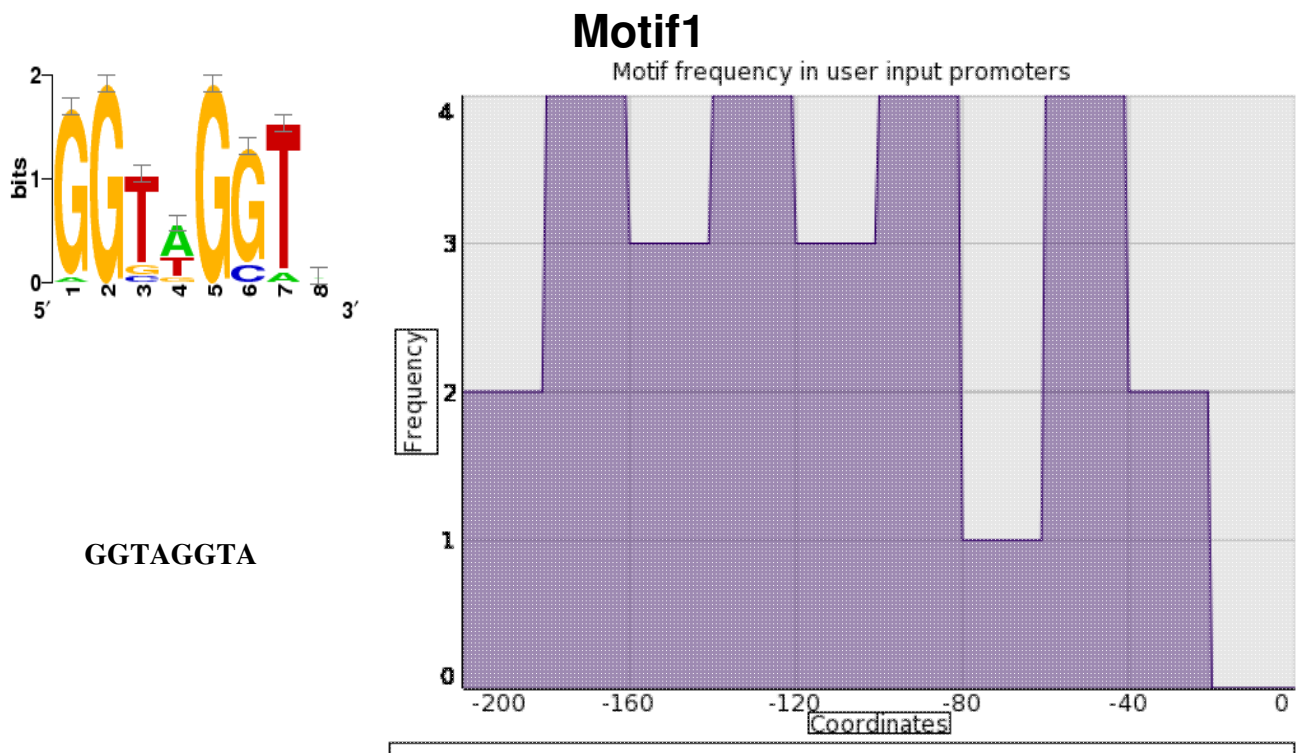

Motif1 annotation in the genome

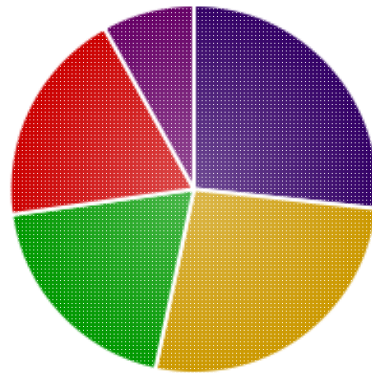

| Annotation | p-value  |
|------------|----------|
| GO:0009081 | 1.51e-04 |
| GO:0004084 | 1.51e-04 |
| GO:0006351 | 1.65e-03 |
| GO:0016459 | 1.83e-03 |
| others     | 8.43e-03 |

**Annotation complete description**

GO:0009081 => branched chain family amino acid metabolic process GO:0004084 => branched-chain-amino-acid transaminase activity GO:0006351 => transcription, DNA-dependent GO:0016459 => myosin complex GO:0003774 => motor activity GO:0016655 => oxidoreductase activity, acting on NADH or NADPH, quinone or similar compound as acceptor GO:0005971 => ribonucleoside-diphosphate reductase complex

Genome-wide Motif1 search results

Motif1 gene list of over-represented annotation(s)

**Motif2**

Motif frequency in user input promoters

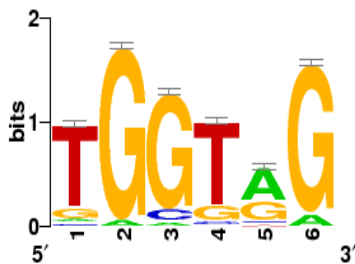

TGGTAG

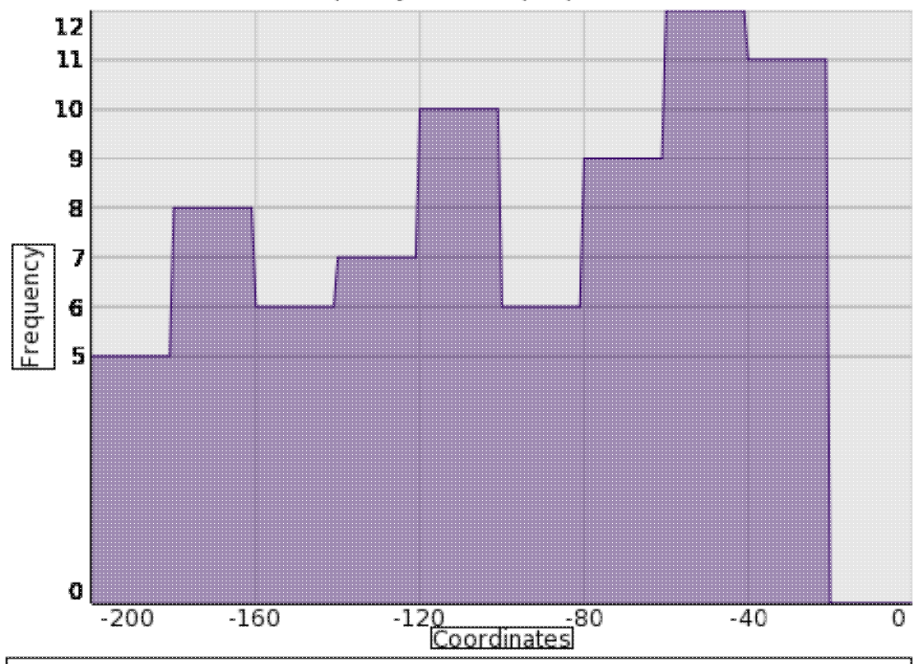

Motif2 annotation in the genome

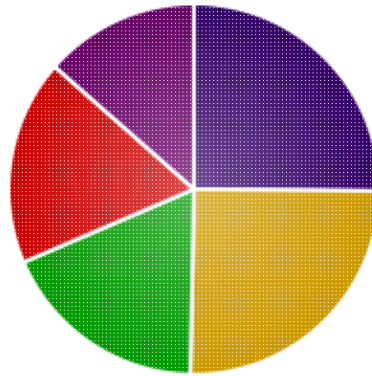

| Annotation | p-value  |
|------------|----------|
| GO:0009081 | 1.70e-04 |
| GO:0004084 | 1.70e-04 |
| GO:0006351 | 1.86e-03 |
| GO:0016459 | 2.06e-03 |
| GO:0003774 | 9.45e-03 |

**Annotation complete description**

GO:0009081 => branched chain family amino acid metabolic process  
 GO:0004084 => branched-chain-amino-acid transaminase activity  
 GO:0006351 => transcription, DNA-dependent  
 GO:0016459 => myosin complex  
 GO:0003774 => motor activity

Genome-wide Motif2 search results

Motif2 gene list of over-represented annotation(s)

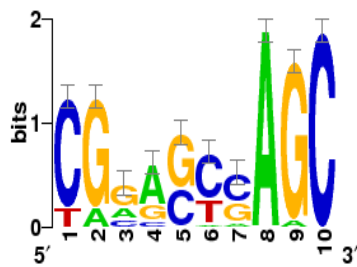

CGGAGCCAGC

**Motif3**

Motif frequency in user input promoters

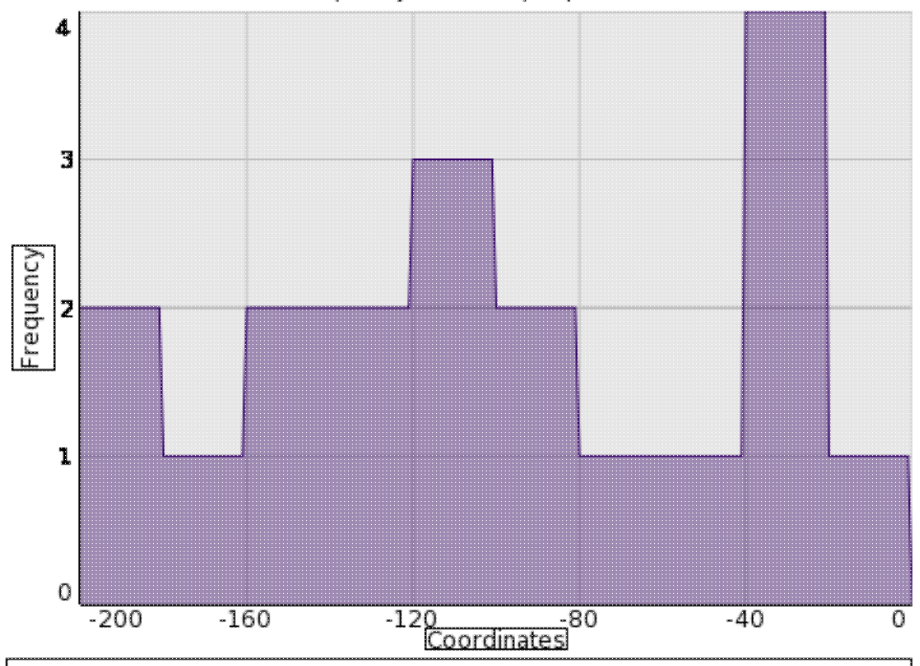

Motif3 annotation in the genome

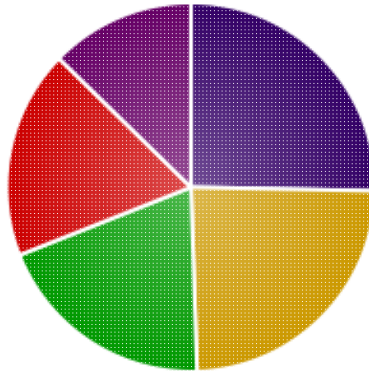

| Annotation | p-value  |
|------------|----------|
| GO:0008270 | 2.71e-04 |
| GO:0016459 | 3.96e-04 |
| GO:0003677 | 1.78e-03 |
| GO:0003676 | 2.65e-03 |
| others     | 4.63e-03 |

**Annotation complete description**

GO:0008270 => zinc ion binding GO:0016459 => myosin complex GO:0003677 => DNA binding GO:0003676 => nucleic acid binding GO:0009081 => branched chain family amino acid metabolic process GO:0004084 => branched-chain-amino-acid transaminase activity GO:0016987 => sigma factor activity

Genome-wide Motif3 search results

Motif3 gene list of over-represented annotation(s)

**Motif4**

Motif frequency in user input promoters

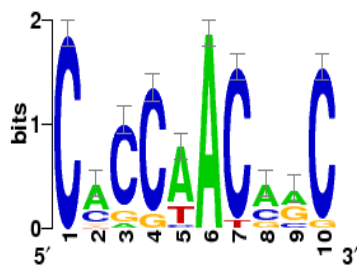

CACCAACAAC

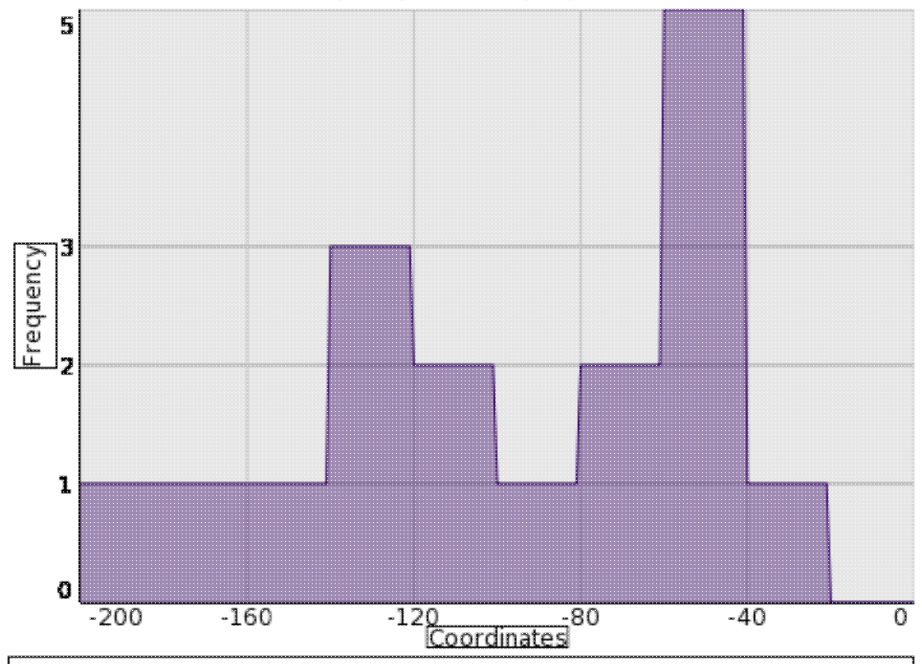

Motif4 annotation in the genome

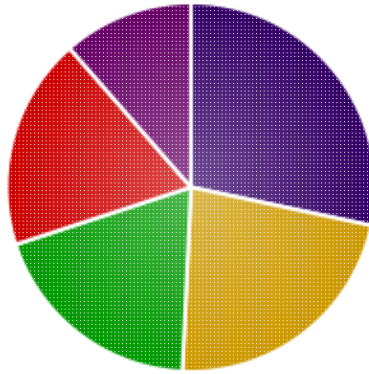

| Annotation | p-value  |
|------------|----------|
| GO:0016459 | 7.62e-05 |
| GO:0016021 | 5.54e-04 |
| GO:0003774 | 1.61e-03 |
| GO:0009081 | 1.98e-03 |
| others     | 1.98e-03 |

**Annotation complete description**

GO:0016459 => myosin complex GO:0016021 => integral to membrane GO:0003774 => motor activity  
 GO:0009081 => branched chain family amino acid metabolic process GO:0004084 =>  
 branched-chain-amino-acid transaminase activity GO:0008199 => ferric iron binding GO:0031072 => heat  
 shock protein binding

Genome-wide Motif4 search results

Motif4 gene list of over-represented annotation(s)

**Motif5**

Motif frequency in user input promoters

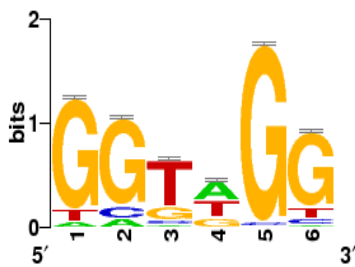

GGTAGG

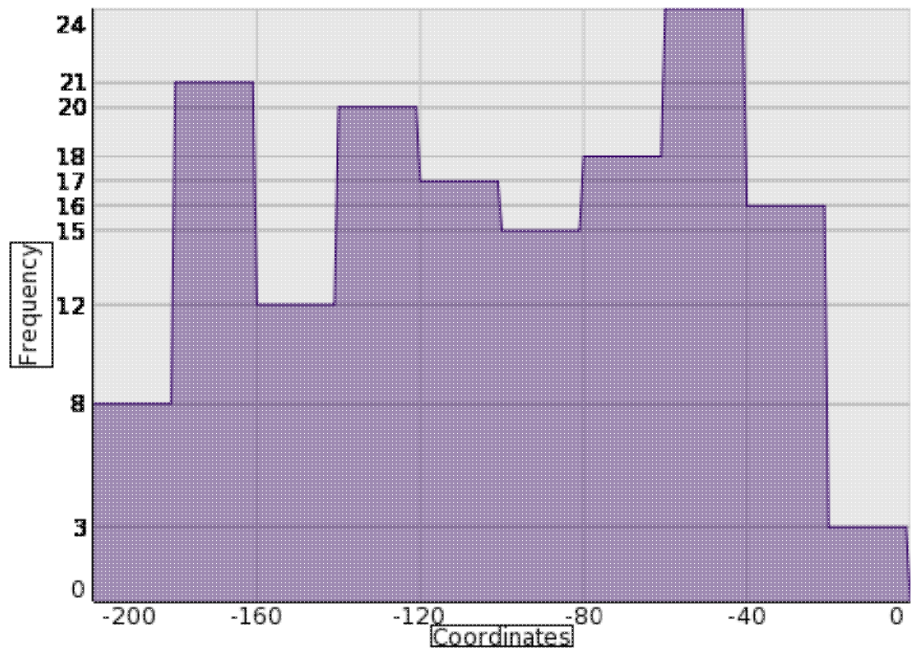

Motif5 annotation in the genome

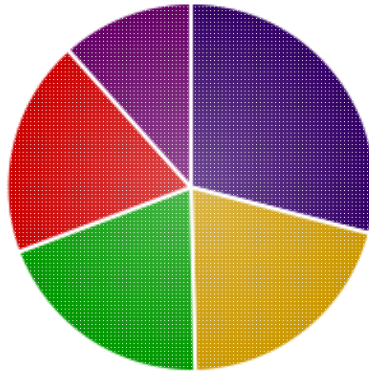

| Annotation | p-value  |
|------------|----------|
| GO:0016459 | 8.07e-05 |
| GO:0016021 | 1.25e-03 |
| GO:0003774 | 1.70e-03 |
| GO:0009081 | 2.04e-03 |
| others     | 2.04e-03 |

**Annotation complete description**

GO:0016459 => myosin complex GO:0016021 => integral to membrane GO:0003774 => motor activity  
GO:0009081 => branched chain family amino acid metabolic process GO:0004084 =>  
branched-chain-amino-acid transaminase activity GO:0008199 => ferric iron binding GO:0031072 => heat  
shock protein binding

Genome-wide Motif5 search results

Motif5 gene list of over-represented annotation(s)

Sequence logo generated by [weblogo](#)  
Graphic generated with [Chart::Clicker.Perl module](#)  
[Promzea program from the Raizada lab](#)
